# Supplementary material for: Few Open Access Journals&nbsp;are Plan S Compliant
Source: Preprints.org preprint supplement (doi:10.20944/preprints201901.0165.v1), 2019-01-16
Supplement: Supplementary file 1 [file supplementary]

## Sheet: Scholarly field
Radetiketter	Antall av Journal title
Agriculture	53
Agriculture | Geography. Anthropology. Recreation: Environmental sciences	8
Agriculture | Medicine: Therapeutics. Pharmacology	1
Agriculture | Science	5
Agriculture | Science: Biology (General)	5
Agriculture | Science: Biology (General): Ecology	1
Agriculture | Science: Botany	4
Agriculture | Social Sciences	2
Agriculture | Social Sciences: Communities. Classes. Races: Urban groups. The city. Urban sociology: Regional planning	1
Agriculture | Social Sciences: Industries. Land use. Labor: Industry: Rural industries	1
Agriculture | Social Sciences: Industries. Land use. Labor: Special industries and trades: Agricultural industries	3
Agriculture | Social Sciences: Social sciences (General)	1
Agriculture | Social Sciences: Sociology (General)	1
Agriculture | Technology	3
Agriculture | Technology | Science	2
Agriculture | Technology: Chemical technology: Food processing and manufacture	1
Agriculture | Technology: Environmental technology. Sanitary engineering	1
Agriculture | Technology: Home economics: Nutrition. Foods and food supply	2
Agriculture | Technology: Home economics: Nutrition. Foods and food supply | Geography. Anthropology. Recreation: Recreation. Leisure | Geography. Anthropology. Recreation: Human ecology. Anthropogeography | Geography. Anthropology. Recreation: Environmental sciences | Social Sciences: Communities. Classes. Races: Urban groups. The city. Urban sociology: Regional planning	1
Agriculture | Technology: Mechanical engineering and machinery	1
Agriculture: Agriculture (General)	112
Agriculture: Agriculture (General) | Agriculture: Animal culture	5
Agriculture: Agriculture (General) | Agriculture: Animal culture: Veterinary medicine	1
Agriculture: Agriculture (General) | Agriculture: Plant culture	13
Agriculture: Agriculture (General) | Education: Education (General)	1
Agriculture: Agriculture (General) | Education: Special aspects of education	1
Agriculture: Agriculture (General) | Geography. Anthropology. Recreation: Environmental sciences	10
Agriculture: Agriculture (General) | Geography. Anthropology. Recreation: Geography (General)	1
Agriculture: Agriculture (General) | Law: Law in general. Comparative and uniform law. Jurisprudence: Comparative law. International uniform law: Environmental law	1
Agriculture: Agriculture (General) | Medicine: Internal medicine: Specialties of internal medicine: Immunologic diseases. Allergy	1
Agriculture: Agriculture (General) | Medicine: Medicine (General)	2
Agriculture: Agriculture (General) | Philosophy. Psychology. Religion: Islam. Bahai Faith. Theosophy, etc.: Islam	1
Agriculture: Agriculture (General) | Science: Biology (General)	1
Agriculture: Agriculture (General) | Science: Botany	1
Agriculture: Agriculture (General) | Science: Botany: Plant ecology	1
Agriculture: Agriculture (General) | Science: Geology	1
Agriculture: Agriculture (General) | Science: Physics: Meteorology. Climatology	1
Agriculture: Agriculture (General) | Science: Science (General)	3
Agriculture: Agriculture (General) | Social Sciences: Commerce | Social Sciences: Economic history and conditions	1
Agriculture: Agriculture (General) | Social Sciences: Commerce: Business	5
Agriculture: Agriculture (General) | Social Sciences: Economic theory. Demography: Economics as a science	1
Agriculture: Agriculture (General) | Social Sciences: Industries. Land use. Labor: Economic growth, development, planning	2
Agriculture: Agriculture (General) | Social Sciences: Industries. Land use. Labor: Land use	1
Agriculture: Agriculture (General) | Social Sciences: Industries. Land use. Labor: Special industries and trades: Agricultural industries	4
Agriculture: Agriculture (General) | Social Sciences: Social history and conditions. Social problems. Social reform	1
Agriculture: Agriculture (General) | Technology	1
Agriculture: Agriculture (General) | Technology: Chemical technology: Biotechnology	4
Agriculture: Agriculture (General) | Technology: Engineering (General). Civil engineering (General)	2
Agriculture: Agriculture (General) | Technology: Environmental technology. Sanitary engineering	1
Agriculture: Agriculture (General) | Technology: Home economics: Nutrition. Foods and food supply	3
Agriculture: Agriculture (General) | Technology: Manufactures	1
Agriculture: Agriculture (General) | Technology: Mechanical engineering and machinery: Machine design and drawing	1
Agriculture: Agriculture (General) | Technology: Technology (General)	5
Agriculture: Agriculture (General) | Technology: Technology (General): Industrial engineering. Management engineering: Information technology	1
Agriculture: Animal culture	37
Agriculture: Animal culture | Medicine: Medicine (General) | Science: Science (General)	1
Agriculture: Animal culture | Science: Biology (General): Ecology | Science: Biology (General): Genetics | Science: Biology (General): Economic biology	1
Agriculture: Animal culture | Science: Biology (General): Genetics	2
Agriculture: Animal culture | Science: Physiology: Animal biochemistry	2
Agriculture: Animal culture | Science: Physiology: Neurophysiology and neuropsychology	1
Agriculture: Animal culture | Science: Zoology	3
Agriculture: Animal culture | Technology: Chemical technology: Biotechnology	1
Agriculture: Animal culture: Cattle | Agriculture: Animal culture: Veterinary medicine	1
Agriculture: Animal culture: Cattle: Dairy processing. Dairy products	1
Agriculture: Animal culture: Cattle: Dairying	1
Agriculture: Animal culture: Veterinary medicine	78
Agriculture: Animal culture: Veterinary medicine | Medicine	2
Agriculture: Animal culture: Veterinary medicine | Medicine: Medicine (General)	1
Agriculture: Animal culture: Veterinary medicine | Science: Biology (General)	1
Agriculture: Animal culture: Veterinary medicine | Science: Physiology: Animal biochemistry	1
Agriculture: Animal culture: Veterinary medicine | Science: Zoology	2
Agriculture: Aquaculture. Fisheries. Angling	33
Agriculture: Aquaculture. Fisheries. Angling | Agriculture: Agriculture (General)	1
Agriculture: Aquaculture. Fisheries. Angling | Agriculture: Animal culture	1
Agriculture: Aquaculture. Fisheries. Angling | Agriculture: Forestry	1
Agriculture: Aquaculture. Fisheries. Angling | Agriculture: Plant culture | Agriculture: Animal culture	1
Agriculture: Aquaculture. Fisheries. Angling | Geography. Anthropology. Recreation: Environmental sciences	1
Agriculture: Aquaculture. Fisheries. Angling | Geography. Anthropology. Recreation: Oceanography	4
Agriculture: Aquaculture. Fisheries. Angling | Geography. Anthropology. Recreation: Oceanography | Science: Biology (General)	1
Agriculture: Aquaculture. Fisheries. Angling | Naval Science: Naval architecture. Shipbuilding. Marine engineering	2
Agriculture: Aquaculture. Fisheries. Angling | Science: Biology (General)	1
Agriculture: Aquaculture. Fisheries. Angling | Science: Biology (General): Ecology	3
Agriculture: Aquaculture. Fisheries. Angling | Science: Zoology	2
Agriculture: Forestry	46
Agriculture: Forestry | Agriculture: Plant culture | Science: Botany: Plant ecology	1
Agriculture: Forestry | Fine Arts: Print media: Printmaking and engraving	1
Agriculture: Forestry | Geography. Anthropology. Recreation: Environmental sciences	1
Agriculture: Forestry | Geography. Anthropology. Recreation: Environmental sciences | Science: Biology (General): Ecology	1
Agriculture: Forestry | Geography. Anthropology. Recreation: Human ecology. Anthropogeography: Settlements: Cities. Urban geography	1
Agriculture: Forestry | Science: Botany	1
Agriculture: Forestry | Science: Natural history (General): General. Including nature conservation, geographical distribution	1
Agriculture: Forestry | Technology: Environmental technology. Sanitary engineering	1
Agriculture: Plant culture	32
Agriculture: Plant culture | Geography. Anthropology. Recreation: Environmental sciences	1
Agriculture: Plant culture | Geography. Anthropology. Recreation: Environmental sciences | Science: Botany: Plant ecology	1
Agriculture: Plant culture | Science: Biology (General)	2
Agriculture: Plant culture | Science: Biology (General): Genetics	1
Agriculture: Plant culture | Science: Botany	5
Agriculture: Plant culture | Science: Botany: Plant ecology	3
Agriculture: Plant culture | Science: Chemistry: Organic chemistry: Biochemistry	1
Agriculture: Plant culture | Science: Microbiology: Microbial ecology | Science: Botany: Plant ecology	1
Agriculture: Plant culture | Technology: Chemical technology: Biotechnology	2
Agriculture: Plant culture | Technology: Chemical technology: Biotechnology | Science: Botany	1
Auxiliary sciences of history	1
Auxiliary sciences of history | Bibliography. Library science. Information resources	2
Auxiliary sciences of history | History (General) and history of Europe	1
Auxiliary sciences of history | History (General) and history of Europe: History (General): Ancient history	1
Auxiliary sciences of history: Archaeology	50
Auxiliary sciences of history: Archaeology | History (General) and history of Europe: History (General)	3
Auxiliary sciences of history: Archaeology | History (General) and history of Europe: History (General): Ancient history	1
Auxiliary sciences of history: Archaeology | History (General) and history of Europe: History (General): Medieval history	2
Auxiliary sciences of history: Archaeology | History (General) and history of Europe: History (General): Medieval history | Language and Literature	1
Auxiliary sciences of history: Archaeology | History (General) and history of Europe: History of Italy	1
Auxiliary sciences of history: Archaeology | History (General) and history of Europe: History of the Greco-Roman World	1
Auxiliary sciences of history: Archaeology | History (General) and history of Europe: History of the Greco-Roman World | Language and Literature: Greek language and literature. Latin language and literature	1
Auxiliary sciences of history: Archaeology | History America: Latin America. Spanish America	1
Auxiliary sciences of history: Archaeology | Science: Mathematics: Instruments and machines: Electronic computers. Computer science	1
Auxiliary sciences of history: Archaeology | Social Sciences	1
Auxiliary sciences of history: Diplomatics. Archives. Seals	1
Auxiliary sciences of history: Diplomatics. Archives. Seals | Bibliography. Library science. Information resources	2
Auxiliary sciences of history: Diplomatics. Archives. Seals | History (General) and history of Europe: History (General)	1
Auxiliary sciences of history: History of Civilization	3
Auxiliary sciences of history: History of Civilization | History (General) and history of Europe: History (General)	1
Auxiliary sciences of history: History of Civilization | Language and Literature: Philology. Linguistics	1
Auxiliary sciences of history: History of Civilization | Philosophy. Psychology. Religion: Islam. Bahai Faith. Theosophy, etc.: Islam	1
Auxiliary sciences of history: History of Civilization | Social Sciences: Societies: secret, benevolent, etc.	1
Bibliography. Library science. Information resources	110
Bibliography. Library science. Information resources | Medicine	1
Bibliography. Library science. Information resources | Medicine | Science	1
Bibliography. Library science. Information resources | Medicine: Medicine (General)	2
Bibliography. Library science. Information resources | Philosophy. Psychology. Religion: Doctrinal Theology	1
Bibliography. Library science. Information resources | Philosophy. Psychology. Religion: Islam. Bahai Faith. Theosophy, etc.: Islam | Social Sciences	1
Bibliography. Library science. Information resources: Bibliography	1
Bibliography. Library science. Information resources: Information resources (General)	11
Bibliography. Library science. Information resources: Information resources (General) | Medicine: Medicine (General)	1
Education	141
Education | Auxiliary sciences of history	1
Education | Bibliography. Library science. Information resources	1
Education | Bibliography. Library science. Information resources: Information resources (General)	1
Education | Geography. Anthropology. Recreation: Recreation. Leisure: Sports	1
Education | Geography. Anthropology. Recreation: Recreation. Leisure: Sports | Medicine	1
Education | History (General) and history of Europe | History America: Latin America. Spanish America	1
Education | Language and Literature	3
Education | Language and Literature: Literature (General)	1
Education | Language and Literature: Philology. Linguistics	2
Education | Language and Literature: Philology. Linguistics: Communication. Mass media	1
Education | Medicine	1
Education | Medicine: Medicine (General)	2
Education | Music and books on Music: Musical instruction and study	1
Education | Philosophy. Psychology. Religion	1
Education | Philosophy. Psychology. Religion: Islam. Bahai Faith. Theosophy, etc.	1
Education | Philosophy. Psychology. Religion: Islam. Bahai Faith. Theosophy, etc.: Islam	3
Education | Philosophy. Psychology. Religion: Psychology	6
Education | Political science | Social Sciences	1
Education | Science	1
Education | Science: Biology (General)	1
Education | Science: Mathematics	3
Education | Science: Mathematics: Instruments and machines: Electronic computers. Computer science: Computer software	1
Education | Social Sciences	10
Education | Social Sciences: Commerce: Business	2
Education | Social Sciences: Industries. Land use. Labor: Labor. Work. Working class	1
Education | Social Sciences: Social sciences (General)	4
Education | Social Sciences: Sociology (General)	1
Education | Technology	4
Education | Technology: Technology (General): Industrial engineering. Management engineering: Information technology	1
Education: Education (General)	265
Education: Education (General) | Bibliography. Library science. Information resources	2
Education: Education (General) | Education: Special aspects of education	25
Education: Education (General) | Education: Special aspects of education | Education: Theory and practice of education	1
Education: Education (General) | Education: Theory and practice of education	12
Education: Education (General) | General Works | Geography. Anthropology. Recreation: Environmental sciences	1
Education: Education (General) | General Works: History of scholarship and learning. The humanities	1
Education: Education (General) | Geography. Anthropology. Recreation: Environmental sciences	1
Education: Education (General) | Geography. Anthropology. Recreation: Environmental sciences | Science: Physiology	1
Education: Education (General) | Geography. Anthropology. Recreation: Geography (General)	1
Education: Education (General) | Geography. Anthropology. Recreation: Recreation. Leisure: Sports	2
Education: Education (General) | History (General) and history of Europe: History (General)	3
Education: Education (General) | Language and Literature	14
Education: Education (General) | Language and Literature: English language	13
Education: Education (General) | Language and Literature: Languages and literature of Eastern Asia, Africa, Oceania: Japanese language and literature	1
Education: Education (General) | Language and Literature: Oriental languages and literatures	3
Education: Education (General) | Language and Literature: Philology. Linguistics	11
Education: Education (General) | Language and Literature: Philology. Linguistics: Communication. Mass media	2
Education: Education (General) | Language and Literature: Philology. Linguistics: Language. Linguistic theory. Comparative grammar	4
Education: Education (General) | Medicine: Medicine (General)	13
Education: Education (General) | Music and books on Music: Music	1
Education: Education (General) | Philosophy. Psychology. Religion: Islam. Bahai Faith. Theosophy, etc.	1
Education: Education (General) | Philosophy. Psychology. Religion: Islam. Bahai Faith. Theosophy, etc.: Islam	19
Education: Education (General) | Philosophy. Psychology. Religion: Philosophy (General)	3
Education: Education (General) | Philosophy. Psychology. Religion: Practical Theology: Practical religion. The Christian life	1
Education: Education (General) | Philosophy. Psychology. Religion: Psychology	3
Education: Education (General) | Philosophy. Psychology. Religion: Religions. Mythology. Rationalism: Religion (General)	3
Education: Education (General) | Science	2
Education: Education (General) | Science: Biology (General)	5
Education: Education (General) | Science: Chemistry	2
Education: Education (General) | Science: Chemistry: Organic chemistry: Biochemistry	1
Education: Education (General) | Science: Mathematics	25
Education: Education (General) | Science: Mathematics: Instruments and machines: Electronic computers. Computer science	1
Education: Education (General) | Science: Physics	8
Education: Education (General) | Science: Science (General)	10
Education: Education (General) | Social Sciences	2
Education: Education (General) | Social Sciences: Commerce: Business: Accounting. Bookkeeping	1
Education: Education (General) | Social Sciences: Commerce: Business: Vocational guidance. Career development	1
Education: Education (General) | Social Sciences: Economic theory. Demography: Economics as a science	3
Education: Education (General) | Social Sciences: Finance	1
Education: Education (General) | Social Sciences: Industries. Land use. Labor	1
Education: Education (General) | Social Sciences: Social pathology. Social and public welfare. Criminology	1
Education: Education (General) | Social Sciences: Social sciences (General)	11
Education: Education (General) | Technology: Engineering (General). Civil engineering (General)	1
Education: Education (General) | Technology: Technology (General)	3
Education: Education (General) | Technology: Technology (General): Industrial engineering. Management engineering: Information technology	3
Education: History of education	11
Education: History of education | Education: Special aspects of education	2
Education: History of education | Education: Special aspects of education | Education: Theory and practice of education	1
Education: History of education | Education: Theory and practice of education	2
Education: History of education | History (General) and history of Europe	1
Education: History of education | History (General) and history of Europe: History (General)	1
Education: Special aspects of education	165
Education: Special aspects of education | Education: Theory and practice of education	17
Education: Special aspects of education | Education: Theory and practice of education | Social Sciences: The family. Marriage. Woman	1
Education: Special aspects of education | Geography. Anthropology. Recreation: Environmental sciences	2
Education: Special aspects of education | Geography. Anthropology. Recreation: Geography (General)	4
Education: Special aspects of education | Geography. Anthropology. Recreation: Recreation. Leisure: Sports	9
Education: Special aspects of education | History (General) and history of Europe: History (General)	2
Education: Special aspects of education | History America: Latin America. Spanish America	2
Education: Special aspects of education | Language and Literature	4
Education: Special aspects of education | Language and Literature: English language	6
Education: Special aspects of education | Language and Literature: Literature (General)	3
Education: Special aspects of education | Language and Literature: Literature (General): Drama	1
Education: Special aspects of education | Language and Literature: Philology. Linguistics	4
Education: Special aspects of education | Language and Literature: Philology. Linguistics: Communication. Mass media	3
Education: Special aspects of education | Language and Literature: Philology. Linguistics: Communication. Mass media | Social Sciences: Commerce: Business: Business communication. Including business report writing, business correspondence	1
Education: Special aspects of education | Language and Literature: Philology. Linguistics: Language. Linguistic theory. Comparative grammar	4
Education: Special aspects of education | Language and Literature: Philology. Linguistics: Language. Linguistic theory. Comparative grammar: Language acquisition	3
Education: Special aspects of education | Law	2
Education: Special aspects of education | Law: Islamic law	1
Education: Special aspects of education | Law: Law in general. Comparative and uniform law. Jurisprudence	2
Education: Special aspects of education | Medicine	4
Education: Special aspects of education | Medicine: Internal medicine: Neurosciences. Biological psychiatry. Neuropsychiatry	2
Education: Special aspects of education | Medicine: Medicine (General)	7
Education: Special aspects of education | Medicine: Medicine (General): General works	1
Education: Special aspects of education | Medicine: Public aspects of medicine	3
Education: Special aspects of education | Philosophy. Psychology. Religion: Ethics	2
Education: Special aspects of education | Philosophy. Psychology. Religion: Islam. Bahai Faith. Theosophy, etc.: Islam	4
Education: Special aspects of education | Philosophy. Psychology. Religion: Philosophy (General)	5
Education: Special aspects of education | Philosophy. Psychology. Religion: Psychology	8
Education: Special aspects of education | Philosophy. Psychology. Religion: Psychology | Social Sciences	1
Education: Special aspects of education | Political science: Political institutions and public administration (General)	1
Education: Special aspects of education | Science: Biology (General)	2
Education: Special aspects of education | Science: Biology (General): Evolution	1
Education: Special aspects of education | Science: Mathematics	8
Education: Special aspects of education | Science: Mathematics: Instruments and machines: Electronic computers. Computer science	1
Education: Special aspects of education | Science: Mathematics: Instruments and machines: Electronic computers. Computer science: Computer software	1
Education: Special aspects of education | Science: Mathematics: Probabilities. Mathematical statistics	1
Education: Special aspects of education | Science: Physics	1
Education: Special aspects of education | Science: Science (General)	4
Education: Special aspects of education | Science: Science (General) | Social Sciences	1
Education: Special aspects of education | Social Sciences: Commerce: Business: Industrial psychology	1
Education: Special aspects of education | Social Sciences: Industries. Land use. Labor: Labor. Work. Working class: Industrial arbitration. Meditation and conciliation	1
Education: Special aspects of education | Social Sciences: Industries. Land use. Labor: Labor. Work. Working class: Vocational rehabilitation. Employment of people with disabilities	2
Education: Special aspects of education | Social Sciences: Social history and conditions. Social problems. Social reform	1
Education: Special aspects of education | Social Sciences: Social sciences (General)	6
Education: Special aspects of education | Social Sciences: Sociology (General)	2
Education: Special aspects of education | Social Sciences: The family. Marriage. Woman	1
Education: Special aspects of education | Social Sciences: The family. Marriage. Woman: Women. Feminism	1
Education: Special aspects of education | Technology	1
Education: Special aspects of education | Technology | Science	1
Education: Special aspects of education | Technology: Engineering (General). Civil engineering (General)	2
Education: Special aspects of education | Technology: Manufactures: Production management. Operations management	1
Education: Special aspects of education | Technology: Technology (General)	2
Education: Special aspects of education | Technology: Technology (General): Industrial engineering. Management engineering: Applied mathematics. Quantitative methods | Science: Mathematics	1
Education: Special aspects of education | Technology: Technology (General): Industrial engineering. Management engineering: Information technology	3
Education: Theory and practice of education	87
Education: Theory and practice of education | Geography. Anthropology. Recreation | Social Sciences	1
Education: Theory and practice of education | History (General) and history of Europe: History (General): Ancient history | Language and Literature: Greek language and literature. Latin language and literature	1
Education: Theory and practice of education | Language and Literature	1
Education: Theory and practice of education | Language and Literature: American literature	1
Education: Theory and practice of education | Language and Literature: English language	3
Education: Theory and practice of education | Language and Literature: Oriental languages and literatures	1
Education: Theory and practice of education | Language and Literature: Philology. Linguistics	2
Education: Theory and practice of education | Philosophy. Psychology. Religion: Islam. Bahai Faith. Theosophy, etc.: Islam	2
Education: Theory and practice of education | Philosophy. Psychology. Religion: Psychology	2
Education: Theory and practice of education | Science	3
Education: Theory and practice of education | Science: Mathematics	2
Education: Theory and practice of education | Social Sciences	1
Education: Theory and practice of education | Social Sciences: Social sciences (General)	1
Education: Theory and practice of education | Social Sciences: Societies: secret, benevolent, etc.	1
Education: Theory and practice of education | Social Sciences: Sociology (General)	1
Fine Arts	16
Fine Arts | Auxiliary sciences of history: Archaeology	1
Fine Arts | Education	2
Fine Arts | Education: Special aspects of education	1
Fine Arts | Geography. Anthropology. Recreation: Anthropology | Auxiliary sciences of history: Archaeology	1
Fine Arts | Geography. Anthropology. Recreation: Anthropology: Ethnology. Social and cultural anthropology | Geography. Anthropology. Recreation: Folklore	1
Fine Arts | Language and Literature	4
Fine Arts | Language and Literature: French literature - Italian literature - Spanish literature - Portuguese literature	1
Fine Arts | Language and Literature: Literature (General)	1
Fine Arts | Language and Literature: Literature (General): The performing arts. Show business	1
Fine Arts | Language and Literature: Philology. Linguistics: Communication. Mass media	1
Fine Arts | Music and books on Music: Music	1
Fine Arts | Philosophy. Psychology. Religion: Aesthetics	1
Fine Arts | Science: Chemistry: Analytical chemistry	1
Fine Arts | Social Sciences	4
Fine Arts: Architecture	46
Fine Arts: Architecture | Auxiliary sciences of history: Archaeology	1
Fine Arts: Architecture | Auxiliary sciences of history: Archaeology | History (General) and history of Europe: History of Asia	1
Fine Arts: Architecture | Geography. Anthropology. Recreation: Human ecology. Anthropogeography	1
Fine Arts: Architecture | Geography. Anthropology. Recreation: Human ecology. Anthropogeography: Settlements: Cities. Urban geography	1
Fine Arts: Architecture | History (General) and history of Europe: History (General)	1
Fine Arts: Architecture | History (General) and history of Europe: History of Italy	1
Fine Arts: Architecture | Social Sciences: Communities. Classes. Races: Urban groups. The city. Urban sociology	12
Fine Arts: Architecture | Social Sciences: Communities. Classes. Races: Urban groups. The city. Urban sociology: City planning	3
Fine Arts: Architecture | Social Sciences: Industries. Land use. Labor: Special industries and trades: Construction industry	1
Fine Arts: Architecture | Technology	1
Fine Arts: Architecture | Technology: Building construction	4
Fine Arts: Architecture | Technology: Building construction: Architectural engineering. Structural engineering of buildings	1
Fine Arts: Architecture | Technology: Engineering (General). Civil engineering (General)	6
Fine Arts: Architecture | Technology: Engineering (General). Civil engineering (General) | Technology: Building construction: Architectural engineering. Structural engineering of buildings | Technology: Technology (General): Industrial engineering. Management engineering	1
Fine Arts: Architecture: Aesthetics of cities. City planning and beautifying	10
Fine Arts: Architecture: Aesthetics of cities. City planning and beautifying | Geography. Anthropology. Recreation: Human ecology. Anthropogeography | Social Sciences: Communities. Classes. Races: Urban groups. The city. Urban sociology	1
Fine Arts: Architecture: Aesthetics of cities. City planning and beautifying | Law	1
Fine Arts: Architecture: Aesthetics of cities. City planning and beautifying | Political science | Social Sciences: Communities. Classes. Races: Urban groups. The city. Urban sociology: Regional planning | Social Sciences: Communities. Classes. Races: Urban groups. The city. Urban sociology: City planning	1
Fine Arts: Architecture: Aesthetics of cities. City planning and beautifying | Social Sciences: Communities. Classes. Races: Urban groups. The city. Urban sociology	2
Fine Arts: Architecture: Aesthetics of cities. City planning and beautifying | Social Sciences: Communities. Classes. Races: Urban groups. The city. Urban sociology: City planning	2
Fine Arts: Architecture: Aesthetics of cities. City planning and beautifying | Social Sciences: Communities. Classes. Races: Urban groups. The city. Urban sociology: Urban renewal. Urban redevelopment	1
Fine Arts: Architecture: Aesthetics of cities. City planning and beautifying | Social Sciences: Social sciences (General)	1
Fine Arts: Architecture: Aesthetics of cities. City planning and beautifying | Technology: Building construction	1
Fine Arts: Architecture: Architectural drawing and design	3
Fine Arts: Architecture: Architectural drawing and design | Education: Special aspects of education	1
Fine Arts: Architecture: Architectural drawing and design | Fine Arts: Architecture: Aesthetics of cities. City planning and beautifying	3
Fine Arts: Architecture: Architectural drawing and design | History (General) and history of Europe	1
Fine Arts: Arts in general	41
Fine Arts: Arts in general | Auxiliary sciences of history	1
Fine Arts: Arts in general | Education	1
Fine Arts: Arts in general | Education: Special aspects of education	2
Fine Arts: Arts in general | Fine Arts: Architecture	1
Fine Arts: Arts in general | Fine Arts: Architecture: Aesthetics of cities. City planning and beautifying	1
Fine Arts: Arts in general | Fine Arts: Visual arts	2
Fine Arts: Arts in general | General Works	1
Fine Arts: Arts in general | General Works: History of scholarship and learning. The humanities	3
Fine Arts: Arts in general | Geography. Anthropology. Recreation: Anthropology	1
Fine Arts: Arts in general | Geography. Anthropology. Recreation: Anthropology | Language and Literature: Literature (General)	1
Fine Arts: Arts in general | Geography. Anthropology. Recreation: Anthropology: Ethnology. Social and cultural anthropology	1
Fine Arts: Arts in general | Geography. Anthropology. Recreation: Anthropology: Ethnology. Social and cultural anthropology | History America: Latin America. Spanish America	1
Fine Arts: Arts in general | Geography. Anthropology. Recreation: Recreation. Leisure: Sports	1
Fine Arts: Arts in general | History (General) and history of Europe: History (General): Medieval history	1
Fine Arts: Arts in general | Language and Literature	4
Fine Arts: Arts in general | Language and Literature | Social Sciences	1
Fine Arts: Arts in general | Language and Literature: English language | Language and Literature: English literature	1
Fine Arts: Arts in general | Language and Literature: Literature (General)	2
Fine Arts: Arts in general | Language and Literature: Philology. Linguistics: Communication. Mass media | Language and Literature: Literature (General) | Language and Literature: French literature - Italian literature - Spanish literature - Portuguese literature	1
Fine Arts: Arts in general | Medicine: Internal medicine: Neurosciences. Biological psychiatry. Neuropsychiatry: Neurology. Diseases of the nervous system: Psychiatry: Therapeutics. Psychotherapy	1
Fine Arts: Arts in general | Music and books on Music: Musical instruction and study	1
Fine Arts: Arts in general | Philosophy. Psychology. Religion: Aesthetics	2
Fine Arts: Arts in general | Philosophy. Psychology. Religion: Philosophy (General)	3
Fine Arts: Arts in general | Philosophy. Psychology. Religion: Psychology	2
Fine Arts: Arts in general | Political science: Political theory | Philosophy. Psychology. Religion: Philosophy (General)	1
Fine Arts: Arts in general | Science	1
Fine Arts: Arts in general | Science: Mathematics: Instruments and machines: Electronic computers. Computer science | Social Sciences: Commerce: Business	1
Fine Arts: Arts in general | Social Sciences: Social sciences (General)	1
Fine Arts: Arts in general | Technology: Technology (General)	1
Fine Arts: Arts in general: History of the arts	20
Fine Arts: Arts in general: History of the arts | Fine Arts: Architecture: Aesthetics of cities. City planning and beautifying	1
Fine Arts: Arts in general: History of the arts | Fine Arts: Visual arts	4
Fine Arts: Arts in general: History of the arts | History (General) and history of Europe	2
Fine Arts: Arts in general: History of the arts | History (General) and history of Europe: History (General) | Social Sciences: Social history and conditions. Social problems. Social reform | Social Sciences: Sociology (General)	1
Fine Arts: Arts in general: History of the arts | History (General) and history of Europe: History (General): Medieval history	1
Fine Arts: Arts in general: History of the arts | History (General) and history of Europe: History (General): Modern history, 1453-	1
Fine Arts: Arts in general: History of the arts | History (General) and history of Europe: History (General): Modern history, 1453-: 1789-	1
Fine Arts: Arts in general: History of the arts | History (General) and history of Europe: History of France	1
Fine Arts: Decorative arts	1
Fine Arts: Drawing. Design. Illustration	9
Fine Arts: Drawing. Design. Illustration | Education: Education (General)	1
Fine Arts: Drawing. Design. Illustration | Fine Arts: Arts in general	1
Fine Arts: Drawing. Design. Illustration | Fine Arts: Print media	1
Fine Arts: Drawing. Design. Illustration | Fine Arts: Visual arts	2
Fine Arts: Drawing. Design. Illustration | Language and Literature: Literature (General)	3
Fine Arts: Drawing. Design. Illustration | Medicine: Medicine (General): Computer applications to medicine. Medical informatics | Science: Mathematics: Instruments and machines: Electronic computers. Computer science: Computer software	1
Fine Arts: Drawing. Design. Illustration | Technology: Engineering (General). Civil engineering (General): Engineering design	1
Fine Arts: Painting	1
Fine Arts: Print media	1
Fine Arts: Print media: Printmaking and engraving: Conservation and restoration of prints | Fine Arts: Architecture: Architectural drawing and design	1
Fine Arts: Print media: Printmaking and engraving: Conservation and restoration of prints | Fine Arts: Arts in general: History of the arts	1
Fine Arts: Visual arts	21
Fine Arts: Visual arts | Geography. Anthropology. Recreation: Anthropology: Ethnology. Social and cultural anthropology	1
Fine Arts: Visual arts | Language and Literature: Literature (General)	1
Fine Arts: Visual arts | Language and Literature: Literature (General): Drama: Motion pictures	2
Fine Arts: Visual arts | Language and Literature: Literature (General): The performing arts. Show business	1
Fine Arts: Visual arts | Language and Literature: Philology. Linguistics: Communication. Mass media	6
Fine Arts: Visual arts | Technology: Photography	1
General Works	100
General Works | Language and Literature	1
General Works | Medicine	1
General Works | Social Sciences	1
General Works | Social Sciences: Commerce	1
General Works | Social Sciences: Social sciences (General)	1
General Works: Academies and learned societies	1
General Works: History of scholarship and learning. The humanities	37
General Works: History of scholarship and learning. The humanities | Auxiliary sciences of history: History of Civilization	1
General Works: History of scholarship and learning. The humanities | Bibliography. Library science. Information resources: Information resources (General)	1
General Works: History of scholarship and learning. The humanities | General Works: Museums. Collectors and collecting	1
General Works: History of scholarship and learning. The humanities | Geography. Anthropology. Recreation	2
General Works: History of scholarship and learning. The humanities | Geography. Anthropology. Recreation: Anthropology | Language and Literature	1
General Works: History of scholarship and learning. The humanities | Geography. Anthropology. Recreation: Anthropology: Ethnology. Social and cultural anthropology	1
General Works: History of scholarship and learning. The humanities | History (General) and history of Europe: History of Italy	1
General Works: History of scholarship and learning. The humanities | History America: Latin America. Spanish America	1
General Works: History of scholarship and learning. The humanities | History America: Latin America. Spanish America | Language and Literature: French literature - Italian literature - Spanish literature - Portuguese literature	1
General Works: History of scholarship and learning. The humanities | Language and Literature	2
General Works: History of scholarship and learning. The humanities | Language and Literature: French literature - Italian literature - Spanish literature - Portuguese literature	1
General Works: History of scholarship and learning. The humanities | Language and Literature: Literature (General)	3
General Works: History of scholarship and learning. The humanities | Language and Literature: Philology. Linguistics	1
General Works: History of scholarship and learning. The humanities | Language and Literature: Philology. Linguistics: Communication. Mass media	2
General Works: History of scholarship and learning. The humanities | Medicine: Medicine (General): History of medicine. Medical expeditions	1
General Works: History of scholarship and learning. The humanities | Philosophy. Psychology. Religion: Islam. Bahai Faith. Theosophy, etc.: Islam	1
General Works: History of scholarship and learning. The humanities | Philosophy. Psychology. Religion: Philosophy (General)	3
General Works: History of scholarship and learning. The humanities | Political science | Philosophy. Psychology. Religion: Philosophy (General)	1
General Works: History of scholarship and learning. The humanities | Political science: Political science (General) | Philosophy. Psychology. Religion	1
General Works: History of scholarship and learning. The humanities | Science: Mathematics: Instruments and machines: Electronic computers. Computer science	2
General Works: History of scholarship and learning. The humanities | Science: Science (General) | Social Sciences: Social sciences (General)	1
General Works: History of scholarship and learning. The humanities | Social Sciences	5
General Works: History of scholarship and learning. The humanities | Social Sciences: Social sciences (General)	43
General Works: Museums. Collectors and collecting	7
General Works: Museums. Collectors and collecting | Auxiliary sciences of history: Archaeology	1
General Works: Museums. Collectors and collecting | Auxiliary sciences of history: Diplomatics. Archives. Seals	1
General Works: Museums. Collectors and collecting | Bibliography. Library science. Information resources	1
General Works: Museums. Collectors and collecting | Social Sciences: Sociology (General)	1
General Works: Periodicals	1
Geography. Anthropology. Recreation	9
Geography. Anthropology. Recreation | Auxiliary sciences of history: History of Civilization	1
Geography. Anthropology. Recreation | History (General) and history of Europe: History (General): Ancient history	1
Geography. Anthropology. Recreation | History (General) and history of Europe: History of Oceania (South Seas)	1
Geography. Anthropology. Recreation | History America	1
Geography. Anthropology. Recreation | Language and Literature: Philology. Linguistics: Language. Linguistic theory. Comparative grammar: Translating and interpreting	1
Geography. Anthropology. Recreation | Science: Astronomy: Geodesy | Science: Geology	1
Geography. Anthropology. Recreation | Science: Geology	3
Geography. Anthropology. Recreation | Social Sciences	3
Geography. Anthropology. Recreation | Social Sciences: Economic theory. Demography	1
Geography. Anthropology. Recreation | Social Sciences: Economic theory. Demography: Demography. Population. Vital events	1
Geography. Anthropology. Recreation | Social Sciences: Social history and conditions. Social problems. Social reform	1
Geography. Anthropology. Recreation | Social Sciences: Social sciences (General)	1
Geography. Anthropology. Recreation | Social Sciences: Social sciences and state - Asia (Asian studies only)	1
Geography. Anthropology. Recreation: Anthropology	30
Geography. Anthropology. Recreation: Anthropology | Auxiliary sciences of history: Archaeology	6
Geography. Anthropology. Recreation: Anthropology | Auxiliary sciences of history: Archaeology | History (General) and history of Europe: History of the Greco-Roman World | History (General) and history of Europe: History of Africa | History (General) and history of Europe: History (General) | Philosophy. Psychology. Religion: Religions. Mythology. Rationalism | Social Sciences: Economic history …	1
Geography. Anthropology. Recreation: Anthropology | Auxiliary sciences of history: Archaeology | Social Sciences: Social sciences (General)	1
Geography. Anthropology. Recreation: Anthropology | Auxiliary sciences of history: History of Civilization	1
Geography. Anthropology. Recreation: Anthropology | Geography. Anthropology. Recreation: Folklore | History (General) and history of Europe: History (General)	1
Geography. Anthropology. Recreation: Anthropology | History (General) and history of Europe: History (General)	1
Geography. Anthropology. Recreation: Anthropology | History (General) and history of Europe: History of the Greco-Roman World | History (General) and history of Europe: History (General): Ancient history	1
Geography. Anthropology. Recreation: Anthropology | History America: Latin America. Spanish America	3
Geography. Anthropology. Recreation: Anthropology | Language and Literature | Philosophy. Psychology. Religion	1
Geography. Anthropology. Recreation: Anthropology | Language and Literature: Literature (General): Drama: Dramatic representation. The theater	1
Geography. Anthropology. Recreation: Anthropology | Language and Literature: Philology. Linguistics	1
Geography. Anthropology. Recreation: Anthropology | Language and Literature: Philology. Linguistics: Communication. Mass media	1
Geography. Anthropology. Recreation: Anthropology | Language and Literature: Philology. Linguistics: Language. Linguistic theory. Comparative grammar	1
Geography. Anthropology. Recreation: Anthropology | Medicine: Internal medicine: Special situations and conditions: Geriatrics	1
Geography. Anthropology. Recreation: Anthropology | Political science: International relations	1
Geography. Anthropology. Recreation: Anthropology | Social Sciences	1
Geography. Anthropology. Recreation: Anthropology | Social Sciences: Communities. Classes. Races	1
Geography. Anthropology. Recreation: Anthropology | Social Sciences: Social sciences (General)	5
Geography. Anthropology. Recreation: Anthropology | Social Sciences: Sociology (General)	7
Geography. Anthropology. Recreation: Anthropology | Social Sciences: Sociology (General) | Social Sciences: Social sciences (General)	1
Geography. Anthropology. Recreation: Anthropology: Ethnology. Social and cultural anthropology	39
Geography. Anthropology. Recreation: Anthropology: Ethnology. Social and cultural anthropology | Auxiliary sciences of history: Archaeology	2
Geography. Anthropology. Recreation: Anthropology: Ethnology. Social and cultural anthropology | Geography. Anthropology. Recreation: Folklore	1
Geography. Anthropology. Recreation: Anthropology: Ethnology. Social and cultural anthropology | Geography. Anthropology. Recreation: Human ecology. Anthropogeography: Settlements: Cities. Urban geography | Social Sciences: Communities. Classes. Races: Urban groups. The city. Urban sociology	1
Geography. Anthropology. Recreation: Anthropology: Ethnology. Social and cultural anthropology | History (General) and history of Europe: History of Northern Europe. Scandinavia	1
Geography. Anthropology. Recreation: Anthropology: Ethnology. Social and cultural anthropology | History America: Latin America. Spanish America	1
Geography. Anthropology. Recreation: Anthropology: Ethnology. Social and cultural anthropology | History America: Latin America. Spanish America | Political science: Colonies and colonization. Emigration and immigration. International migration	1
Geography. Anthropology. Recreation: Anthropology: Ethnology. Social and cultural anthropology | Language and Literature	1
Geography. Anthropology. Recreation: Anthropology: Ethnology. Social and cultural anthropology | Language and Literature: French literature - Italian literature - Spanish literature - Portuguese literature	1
Geography. Anthropology. Recreation: Anthropology: Ethnology. Social and cultural anthropology | Language and Literature: Philology. Linguistics: Communication. Mass media	1
Geography. Anthropology. Recreation: Anthropology: Ethnology. Social and cultural anthropology | Language and Literature: Philology. Linguistics: Language. Linguistic theory. Comparative grammar	1
Geography. Anthropology. Recreation: Anthropology: Ethnology. Social and cultural anthropology | Language and Literature: Slavic languages. Baltic languages. Albanian languages	2
Geography. Anthropology. Recreation: Anthropology: Ethnology. Social and cultural anthropology | Philosophy. Psychology. Religion | Social Sciences: Social sciences (General)	1
Geography. Anthropology. Recreation: Anthropology: Ethnology. Social and cultural anthropology | Philosophy. Psychology. Religion: Islam. Bahai Faith. Theosophy, etc.: Islam	1
Geography. Anthropology. Recreation: Anthropology: Ethnology. Social and cultural anthropology | Philosophy. Psychology. Religion: Religions. Mythology. Rationalism: Religion (General)	2
Geography. Anthropology. Recreation: Anthropology: Ethnology. Social and cultural anthropology | Political science	1
Geography. Anthropology. Recreation: Anthropology: Ethnology. Social and cultural anthropology | Political science: Colonies and colonization. Emigration and immigration. International migration	1
Geography. Anthropology. Recreation: Anthropology: Ethnology. Social and cultural anthropology | Science: Science (General)	1
Geography. Anthropology. Recreation: Anthropology: Ethnology. Social and cultural anthropology | Social Sciences	2
Geography. Anthropology. Recreation: Anthropology: Ethnology. Social and cultural anthropology | Social Sciences: Commerce: Business	1
Geography. Anthropology. Recreation: Anthropology: Ethnology. Social and cultural anthropology | Social Sciences: Communities. Classes. Races	1
Geography. Anthropology. Recreation: Anthropology: Ethnology. Social and cultural anthropology | Social Sciences: Industries. Land use. Labor: Labor. Work. Working class | Social Sciences: Sociology (General)	1
Geography. Anthropology. Recreation: Anthropology: Ethnology. Social and cultural anthropology | Social Sciences: Industries. Land use. Labor: Management. Industrial management: Organizational behaviour, change and effectiveness. Corporate culture	1
Geography. Anthropology. Recreation: Anthropology: Ethnology. Social and cultural anthropology | Social Sciences: Social sciences (General)	2
Geography. Anthropology. Recreation: Anthropology: Ethnology. Social and cultural anthropology | Social Sciences: Sociology (General)	2
Geography. Anthropology. Recreation: Anthropology: Ethnology. Social and cultural anthropology | Social Sciences: The family. Marriage. Woman	1
Geography. Anthropology. Recreation: Anthropology: Physical anthropology. Somatology	1
Geography. Anthropology. Recreation: Anthropology: Physical anthropology. Somatology | Social Sciences: Social sciences (General)	1
Geography. Anthropology. Recreation: Anthropology: Physical anthropology. Somatology: Human evolution | Geography. Anthropology. Recreation: Anthropology: Prehistoric archaeology | Science: Geology: Paleontology	1
Geography. Anthropology. Recreation: Anthropology: Physical anthropology. Somatology: Human evolution: Fossil man. Human paleontology | Science: Geology: Paleontology	2
Geography. Anthropology. Recreation: Anthropology: Prehistoric archaeology	1
Geography. Anthropology. Recreation: Anthropology: Prehistoric archaeology | Auxiliary sciences of history: Archaeology	4
Geography. Anthropology. Recreation: Environmental sciences	60
Geography. Anthropology. Recreation: Environmental sciences | Geography. Anthropology. Recreation: Geography (General)	10
Geography. Anthropology. Recreation: Environmental sciences | Geography. Anthropology. Recreation: Oceanography	1
Geography. Anthropology. Recreation: Environmental sciences | Geography. Anthropology. Recreation: Oceanography | Science: Science (General)	1
Geography. Anthropology. Recreation: Environmental sciences | Law	2
Geography. Anthropology. Recreation: Environmental sciences | Law: Law in general. Comparative and uniform law. Jurisprudence	1
Geography. Anthropology. Recreation: Environmental sciences | Law: Law in general. Comparative and uniform law. Jurisprudence: Comparative law. International uniform law: Environmental law	1
Geography. Anthropology. Recreation: Environmental sciences | Medicine	3
Geography. Anthropology. Recreation: Environmental sciences | Medicine: Internal medicine: Neoplasms. Tumors. Oncology. Including cancer and carcinogens	1
Geography. Anthropology. Recreation: Environmental sciences | Medicine: Public aspects of medicine	3
Geography. Anthropology. Recreation: Environmental sciences | Political science	1
Geography. Anthropology. Recreation: Environmental sciences | Science	2
Geography. Anthropology. Recreation: Environmental sciences | Science: Biology (General)	2
Geography. Anthropology. Recreation: Environmental sciences | Science: Biology (General) | Social Sciences	1
Geography. Anthropology. Recreation: Environmental sciences | Science: Biology (General): Ecology	9
Geography. Anthropology. Recreation: Environmental sciences | Science: Chemistry	1
Geography. Anthropology. Recreation: Environmental sciences | Science: Chemistry: Analytical chemistry	1
Geography. Anthropology. Recreation: Environmental sciences | Science: Geology	5
Geography. Anthropology. Recreation: Environmental sciences | Science: Mathematics: Probabilities. Mathematical statistics	1
Geography. Anthropology. Recreation: Environmental sciences | Science: Physics: Meteorology. Climatology	3
Geography. Anthropology. Recreation: Environmental sciences | Science: Science (General)	1
Geography. Anthropology. Recreation: Environmental sciences | Social Sciences	3
Geography. Anthropology. Recreation: Environmental sciences | Social Sciences: Commerce: Business	1
Geography. Anthropology. Recreation: Environmental sciences | Social Sciences: Commerce: Business: Business ethics	1
Geography. Anthropology. Recreation: Environmental sciences | Social Sciences: Communities. Classes. Races: Urban groups. The city. Urban sociology: Regional planning	1
Geography. Anthropology. Recreation: Environmental sciences | Social Sciences: Industries. Land use. Labor: Management. Industrial management: Technological innovations. Automation	1
Geography. Anthropology. Recreation: Environmental sciences | Social Sciences: Industries. Land use. Labor: Special industries and trades: Energy industries. Energy policy. Fuel trade	1
Geography. Anthropology. Recreation: Environmental sciences | Social Sciences: Social sciences (General)	4
Geography. Anthropology. Recreation: Folklore	1
Geography. Anthropology. Recreation: Folklore | Language and Literature	1
Geography. Anthropology. Recreation: Folklore | Language and Literature: Languages and literature of Eastern Asia, Africa, Oceania: Chinese language and literature	1
Geography. Anthropology. Recreation: Geography (General)	108
Geography. Anthropology. Recreation: Geography (General) | History (General) and history of Europe: History (General)	3
Geography. Anthropology. Recreation: Geography (General) | History (General) and history of Europe: History of Asia	1
Geography. Anthropology. Recreation: Geography (General) | History America: Latin America. Spanish America	1
Geography. Anthropology. Recreation: Geography (General) | Philosophy. Psychology. Religion: Religions. Mythology. Rationalism: Religion (General)	1
Geography. Anthropology. Recreation: Geography (General) | Political science	1
Geography. Anthropology. Recreation: Geography (General) | Political science: Colonies and colonization. Emigration and immigration. International migration	1
Geography. Anthropology. Recreation: Geography (General) | Political science: International relations	2
Geography. Anthropology. Recreation: Geography (General) | Political science: Political science (General)	1
Geography. Anthropology. Recreation: Geography (General) | Science	1
Geography. Anthropology. Recreation: Geography (General) | Science: Astronomy: Geodesy	1
Geography. Anthropology. Recreation: Geography (General) | Science: Geology	4
Geography. Anthropology. Recreation: Geography (General) | Science: Mathematics: Instruments and machines: Electronic computers. Computer science: Computer software	1
Geography. Anthropology. Recreation: Geography (General) | Social Sciences: Communities. Classes. Races: Urban groups. The city. Urban sociology	2
Geography. Anthropology. Recreation: Geography (General) | Social Sciences: Communities. Classes. Races: Urban groups. The city. Urban sociology: City planning	1
Geography. Anthropology. Recreation: Geography (General) | Social Sciences: Communities. Classes. Races: Urban groups. The city. Urban sociology: Urbanization. City and country	1
Geography. Anthropology. Recreation: Geography (General) | Social Sciences: Economic theory. Demography: Economics as a science	1
Geography. Anthropology. Recreation: Geography (General) | Social Sciences: Industries. Land use. Labor: Economic growth, development, planning	1
Geography. Anthropology. Recreation: Geography (General) | Social Sciences: Social sciences (General)	5
Geography. Anthropology. Recreation: Geography (General) | Social Sciences: The family. Marriage. Woman: Women. Feminism	1
Geography. Anthropology. Recreation: Human ecology. Anthropogeography	4
Geography. Anthropology. Recreation: Human ecology. Anthropogeography | Geography. Anthropology. Recreation: Environmental sciences	3
Geography. Anthropology. Recreation: Human ecology. Anthropogeography | Geography. Anthropology. Recreation: Environmental sciences | Geography. Anthropology. Recreation: Geography (General)	1
Geography. Anthropology. Recreation: Human ecology. Anthropogeography | Geography. Anthropology. Recreation: Geography (General)	2
Geography. Anthropology. Recreation: Human ecology. Anthropogeography | Geography. Anthropology. Recreation: Geography (General) | Geography. Anthropology. Recreation: Mathematical geography. Cartography: Cartography	1
Geography. Anthropology. Recreation: Human ecology. Anthropogeography | Geography. Anthropology. Recreation: Physical geography | Geography. Anthropology. Recreation: Geography (General)	2
Geography. Anthropology. Recreation: Human ecology. Anthropogeography | Science: Biology (General): Ecology	1
Geography. Anthropology. Recreation: Human ecology. Anthropogeography | Science: Natural history (General)	1
Geography. Anthropology. Recreation: Human ecology. Anthropogeography | Social Sciences: Commerce: Commercial geography. Economic geography | Social Sciences: Communities. Classes. Races: Urban groups. The city. Urban sociology: Regional economics. Space in economics	1
Geography. Anthropology. Recreation: Human ecology. Anthropogeography | Social Sciences: Communities. Classes. Races: Urban groups. The city. Urban sociology	2
Geography. Anthropology. Recreation: Human ecology. Anthropogeography | Social Sciences: Social sciences (General)	1
Geography. Anthropology. Recreation: Human ecology. Anthropogeography: Settlements | Social Sciences: Industries. Land use. Labor: Land use	1
Geography. Anthropology. Recreation: Human ecology. Anthropogeography: Settlements: Cities. Urban geography	3
Geography. Anthropology. Recreation: Human ecology. Anthropogeography: Settlements: Cities. Urban geography | Geography. Anthropology. Recreation: Geography (General)	2
Geography. Anthropology. Recreation: Human ecology. Anthropogeography: Settlements: Cities. Urban geography | Science: Biology (General): Ecology	1
Geography. Anthropology. Recreation: Human ecology. Anthropogeography: Settlements: Cities. Urban geography | Social Sciences: Communities. Classes. Races: Human settlements. Communities	1
Geography. Anthropology. Recreation: Human ecology. Anthropogeography: Settlements: Cities. Urban geography | Social Sciences: Communities. Classes. Races: Urban groups. The city. Urban sociology	6
Geography. Anthropology. Recreation: Human ecology. Anthropogeography: Settlements: Cities. Urban geography | Social Sciences: Communities. Classes. Races: Urban groups. The city. Urban sociology: Urbanization. City and country	2
Geography. Anthropology. Recreation: Manners and customs (General) | History (General) and history of Europe: History of Asia	1
Geography. Anthropology. Recreation: Maps	1
Geography. Anthropology. Recreation: Mathematical geography. Cartography	3
Geography. Anthropology. Recreation: Mathematical geography. Cartography | Science: Astronomy: Geodesy	2
Geography. Anthropology. Recreation: Mathematical geography. Cartography: Cartography	7
Geography. Anthropology. Recreation: Mathematical geography. Cartography: Cartography: Cadastral mapping	4
Geography. Anthropology. Recreation: Oceanography	9
Geography. Anthropology. Recreation: Oceanography | Science: Biology (General)	3
Geography. Anthropology. Recreation: Oceanography | Science: Biology (General): Ecology	1
Geography. Anthropology. Recreation: Oceanography | Science: Geology	2
Geography. Anthropology. Recreation: Oceanography | Science: Physics: Meteorology. Climatology	1
Geography. Anthropology. Recreation: Oceanography | Science: Physics: Meteorology. Climatology | Science: Mathematics: Probabilities. Mathematical statistics	1
Geography. Anthropology. Recreation: Physical geography	3
Geography. Anthropology. Recreation: Physical geography | Geography. Anthropology. Recreation: Environmental sciences	2
Geography. Anthropology. Recreation: Physical geography | Geography. Anthropology. Recreation: Geography (General)	6
Geography. Anthropology. Recreation: Physical geography | Geography. Anthropology. Recreation: Oceanography	1
Geography. Anthropology. Recreation: Physical geography | Science: Geology	2
Geography. Anthropology. Recreation: Physical geography | Science: Geology | Science: Physics: Geomagnetism	1
Geography. Anthropology. Recreation: Recreation. Leisure	15
Geography. Anthropology. Recreation: Recreation. Leisure | Geography. Anthropology. Recreation: Geography (General)	1
Geography. Anthropology. Recreation: Recreation. Leisure | Social Sciences: Commerce: Business	1
Geography. Anthropology. Recreation: Recreation. Leisure | Social Sciences: Communities. Classes. Races: Urban groups. The city. Urban sociology	1
Geography. Anthropology. Recreation: Recreation. Leisure | Social Sciences: Economic history and conditions	1
Geography. Anthropology. Recreation: Recreation. Leisure: Dancing	3
Geography. Anthropology. Recreation: Recreation. Leisure: Dancing | Geography. Anthropology. Recreation: Folklore	1
Geography. Anthropology. Recreation: Recreation. Leisure: Recreation leadership. Administration of recreation services	3
Geography. Anthropology. Recreation: Recreation. Leisure: Recreation leadership. Administration of recreation services | Geography. Anthropology. Recreation: Geography (General)	1
Geography. Anthropology. Recreation: Recreation. Leisure: Recreation leadership. Administration of recreation services | Social Sciences: Communities. Classes. Races: Urban groups. The city. Urban sociology: The city as an economic factor. City promotion	1
Geography. Anthropology. Recreation: Recreation. Leisure: Sports	53
Geography. Anthropology. Recreation: Recreation. Leisure: Sports | History (General) and history of Europe	1
Geography. Anthropology. Recreation: Recreation. Leisure: Sports | Law: Law in general. Comparative and uniform law. Jurisprudence | Philosophy. Psychology. Religion: Ethics	1
Geography. Anthropology. Recreation: Recreation. Leisure: Sports | Medicine: Internal medicine: Special situations and conditions: Sports medicine	12
Geography. Anthropology. Recreation: Recreation. Leisure: Sports | Medicine: Internal medicine: Special situations and conditions: Sports medicine | Science: Human anatomy	1
Geography. Anthropology. Recreation: Recreation. Leisure: Sports | Medicine: Medicine (General)	1
Geography. Anthropology. Recreation: Recreation. Leisure: Sports | Philosophy. Psychology. Religion: Psychology	1
Geography. Anthropology. Recreation: Recreation. Leisure: Sports | Science: Mathematics: Instruments and machines: Electronic computers. Computer science	1
Geography. Anthropology. Recreation: Recreation. Leisure: Sports | Science: Physiology	1
Geography. Anthropology. Recreation: Recreation. Leisure: Sports | Social Sciences: Commerce: Business	1
History (General) and history of Europe	19
History (General) and history of Europe | History America	1
History (General) and history of Europe | History America: Latin America. Spanish America	1
History (General) and history of Europe | Language and Literature	2
History (General) and history of Europe | Language and Literature | Political science | Philosophy. Psychology. Religion | Social Sciences	1
History (General) and history of Europe | Language and Literature: French literature - Italian literature - Spanish literature - Portuguese literature	1
History (General) and history of Europe | Philosophy. Psychology. Religion	2
History (General) and history of Europe | Philosophy. Psychology. Religion: Christianity	1
History (General) and history of Europe | Philosophy. Psychology. Religion: Philosophy (General)	1
History (General) and history of Europe | Political science: Colonies and colonization. Emigration and immigration. International migration	1
History (General) and history of Europe | Political science: International relations	1
History (General) and history of Europe | Political science: Political theory | Social Sciences: Economic theory. Demography: Economics as a science	1
History (General) and history of Europe | Science: Chemistry	1
History (General) and history of Europe | Social Sciences	1
History (General) and history of Europe | Social Sciences: Social sciences (General)	3
History (General) and history of Europe | Social Sciences: Sociology (General)	1
History (General) and history of Europe: History (General)	49
History (General) and history of Europe: History (General) | Bibliography. Library science. Information resources: Information resources (General)	1
History (General) and history of Europe: History (General) | History America: Latin America. Spanish America	14
History (General) and history of Europe: History (General) | Language and Literature: Literature (General)	1
History (General) and history of Europe: History (General) | Military Science	1
History (General) and history of Europe: History (General) | Philosophy. Psychology. Religion: Christianity: History | Science: Natural history (General)	1
History (General) and history of Europe: History (General) | Philosophy. Psychology. Religion: Philosophy (General)	1
History (General) and history of Europe: History (General) | Philosophy. Psychology. Religion: Philosophy (General) | Science: Science (General)	1
History (General) and history of Europe: History (General) | Philosophy. Psychology. Religion: Religions. Mythology. Rationalism: Religion (General)	1
History (General) and history of Europe: History (General) | Philosophy. Psychology. Religion: Religions. Mythology. Rationalism: Religions of the world | Philosophy. Psychology. Religion: Religions. Mythology. Rationalism: History and principles of religions	1
History (General) and history of Europe: History (General) | Philosophy. Psychology. Religion: Speculative philosophy: Metaphysics | Philosophy. Psychology. Religion: Ethics	1
History (General) and history of Europe: History (General) | Political science: Political science (General)	1
History (General) and history of Europe: History (General) | Science: Mathematics: Instruments and machines: Electronic computers. Computer science: Computer software	1
History (General) and history of Europe: History (General) | Social Sciences	2
History (General) and history of Europe: History (General) | Social Sciences: Economic history and conditions	1
History (General) and history of Europe: History (General) | Social Sciences: Social history and conditions. Social problems. Social reform	1
History (General) and history of Europe: History (General) | Social Sciences: Social sciences (General)	2
History (General) and history of Europe: History (General) | Social Sciences: Sociology (General)	1
History (General) and history of Europe: History (General) | Social Sciences: The family. Marriage. Woman: Women. Feminism	1
History (General) and history of Europe: History (General): Ancient history	5
History (General) and history of Europe: History (General): Ancient history | History (General) and history of Europe: History (General): Medieval history | Language and Literature: Philology. Linguistics	1
History (General) and history of Europe: History (General): Ancient history | Language and Literature: Greek language and literature. Latin language and literature	2
History (General) and history of Europe: History (General): Ancient history | Language and Literature: Greek language and literature. Latin language and literature: Greek philology and language	1
History (General) and history of Europe: History (General): Medieval history	12
History (General) and history of Europe: History (General): Medieval history | Language and Literature	1
History (General) and history of Europe: History (General): Medieval history | Language and Literature: Philology. Linguistics: Language. Linguistic theory. Comparative grammar: Style. Composition. Rhetoric | Philosophy. Psychology. Religion	1
History (General) and history of Europe: History (General): Modern history, 1453-	14
History (General) and history of Europe: History (General): Modern history, 1453- | History (General) and history of Europe: History (General): Medieval history	3
History (General) and history of Europe: History (General): Modern history, 1453- | History (General) and history of Europe: History (General): Medieval history | Language and Literature: Literature (General)	1
History (General) and history of Europe: History (General): Modern history, 1453- | Language and Literature	1
History (General) and history of Europe: History (General): Modern history, 1453- | Law: Law of Europe	1
History (General) and history of Europe: History (General): Modern history, 1453-: 1789-	2
History (General) and history of Europe: History (General): Modern history, 1453-: 1789- | Science: Science (General)	1
History (General) and history of Europe: History (General): Modern history, 1453-: 1789-: Europe (General) | Political science	1
History (General) and history of Europe: History (General): Modern history, 1453-: 1789-: Europe (General) | Political science: International relations	1
History (General) and history of Europe: History (General): Modern history, 1453-: 1789-: Europe (General) | Social Sciences: Communities. Classes. Races: Urban groups. The city. Urban sociology: Regional economics. Space in economics	1
History (General) and history of Europe: History of Africa	1
History (General) and history of Europe: History of Africa | History (General) and history of Europe: History (General)	1
History (General) and history of Europe: History of Africa | Language and Literature: Languages and literature of Eastern Asia, Africa, Oceania: African languages and literature	1
History (General) and history of Europe: History of Africa | Medicine: Nursing	1
History (General) and history of Europe: History of Africa | Social Sciences	2
History (General) and history of Europe: History of Africa | Social Sciences: Social sciences (General)	1
History (General) and history of Europe: History of Africa | Social Sciences: Sociology (General)	1
History (General) and history of Europe: History of Asia	7
History (General) and history of Europe: History of Asia | History (General) and history of Europe: History of Africa	2
History (General) and history of Europe: History of Asia | History (General) and history of Europe: History of Africa | Social Sciences: Social sciences (General)	1
History (General) and history of Europe: History of Asia | Philosophy. Psychology. Religion: Islam. Bahai Faith. Theosophy, etc.: Islam	1
History (General) and history of Europe: History of Asia | Philosophy. Psychology. Religion: Religions. Mythology. Rationalism: History and principles of religions	1
History (General) and history of Europe: History of Asia | Social Sciences	1
History (General) and history of Europe: History of Asia | Social Sciences: Social sciences (General)	1
History (General) and history of Europe: History of Austria. Liechtenstein. Hungary. Czechoslovakia	1
History (General) and history of Europe: History of Austria. Liechtenstein. Hungary. Czechoslovakia: Hungary | Language and Literature	1
History (General) and history of Europe: History of Balkan Peninsula	2
History (General) and history of Europe: History of Balkan Peninsula | History (General) and history of Europe: History (General)	1
History (General) and history of Europe: History of Central Europe	1
History (General) and history of Europe: History of Central Europe | History (General) and history of Europe: History of Balkan Peninsula | History (General) and history of Europe: History of Eastern Europe	1
History (General) and history of Europe: History of Central Europe | History (General) and history of Europe: History of Eastern Europe	1
History (General) and history of Europe: History of Central Europe | Language and Literature: French literature - Italian literature - Spanish literature - Portuguese literature	1
History (General) and history of Europe: History of Eastern Europe	4
History (General) and history of Europe: History of Eastern Europe | Language and Literature: Slavic languages. Baltic languages. Albanian languages	1
History (General) and history of Europe: History of Eastern Europe | Social Sciences: Social sciences (General)	1
History (General) and history of Europe: History of Germany	1
History (General) and history of Europe: History of Germany | History (General) and history of Europe: History of France | Social Sciences	1
History (General) and history of Europe: History of Great Britain	1
History (General) and history of Europe: History of Great Britain | Language and Literature	1
History (General) and history of Europe: History of Great Britain | Language and Literature: English literature	2
History (General) and history of Europe: History of Greece	3
History (General) and history of Europe: History of Greece | History (General) and history of Europe: History (General): Medieval history	1
History (General) and history of Europe: History of Italy	2
History (General) and history of Europe: History of Italy | History (General) and history of Europe: History (General): Medieval history	1
History (General) and history of Europe: History of Italy | Language and Literature: French literature - Italian literature - Spanish literature - Portuguese literature	1
History (General) and history of Europe: History of Low Countries - Benelux Countries	2
History (General) and history of Europe: History of Northern Europe. Scandinavia: Norway	1
History (General) and history of Europe: History of Oceania (South Seas) | Language and Literature: Languages and literature of Eastern Asia, Africa, Oceania	1
History (General) and history of Europe: History of Poland | History (General) and history of Europe: History (General)	1
History (General) and history of Europe: History of Portugal	1
History (General) and history of Europe: History of Portugal | History (General) and history of Europe: History of Spain | History America: Latin America. Spanish America | Language and Literature: French literature - Italian literature - Spanish literature - Portuguese literature | Social Sciences	1
History (General) and history of Europe: History of Russia. Soviet Union. Former Soviet Republics	3
History (General) and history of Europe: History of Russia. Soviet Union. Former Soviet Republics | Philosophy. Psychology. Religion: Religions. Mythology. Rationalism: History and principles of religions	1
History (General) and history of Europe: History of Russia. Soviet Union. Former Soviet Republics | Political science: International relations	1
History (General) and history of Europe: History of Russia. Soviet Union. Former Soviet Republics | Political science: Political science (General)	1
History (General) and history of Europe: History of Spain	6
History (General) and history of Europe: History of Spain | History (General) and history of Europe: History (General)	1
History (General) and history of Europe: History of Spain | History (General) and history of Europe: History (General): Medieval history	3
History (General) and history of Europe: History of Spain | History (General) and history of Europe: History (General): Modern history, 1453-	1
History (General) and history of Europe: History of Spain | History (General) and history of Europe: History (General): Modern history, 1453-: 1789-	1
History (General) and history of Europe: History of Spain | History (General) and history of Europe: History (General): Modern history, 1453-: 1789-: Europe (General)	1
History (General) and history of Europe: History of Spain | Language and Literature: French literature - Italian literature - Spanish literature - Portuguese literature	2
History (General) and history of Europe: History of Spain | Language and Literature: French literature - Italian literature - Spanish literature - Portuguese literature | Social Sciences: Social sciences (General)	1
History (General) and history of Europe: History of the Greco-Roman World | History (General) and history of Europe: History (General): Ancient history	1
History (General) and history of Europe: History of the Greco-Roman World | Language and Literature: Greek language and literature. Latin language and literature	3
History (General) and history of Europe: History of the Greco-Roman World | Language and Literature: Greek language and literature. Latin language and literature: Greek philology and language	1
History (General) and history of Europe: History of the Greco-Roman World | Language and Literature: Philology. Linguistics	1
History America	2
History America | Language and Literature | Philosophy. Psychology. Religion	1
History America | Social Sciences: Social sciences (General)	1
History America: America	2
History America: America | History America: Latin America. Spanish America	1
History America: Latin America. Spanish America	29
History America: Latin America. Spanish America | Language and Literature: French literature - Italian literature - Spanish literature - Portuguese literature	4
History America: Latin America. Spanish America | Language and Literature: French literature - Italian literature - Spanish literature - Portuguese literature | Social Sciences	1
History America: Latin America. Spanish America | Philosophy. Psychology. Religion: Christianity | Philosophy. Psychology. Religion: Practical Theology	1
History America: Latin America. Spanish America | Political science	1
History America: Latin America. Spanish America | Political science | Social Sciences	1
History America: Latin America. Spanish America | Political science: Colonies and colonization. Emigration and immigration. International migration	1
History America: Latin America. Spanish America | Political science: Political theory	1
History America: Latin America. Spanish America | Social Sciences	10
History America: Latin America. Spanish America | Social Sciences: Social history and conditions. Social problems. Social reform	3
History America: Latin America. Spanish America | Social Sciences: Social sciences (General)	13
History America: United States	2
History America: United States | Social Sciences: Sociology (General)	1
History America: United States local history	1
Language and Literature	114
Language and Literature | Philosophy. Psychology. Religion	2
Language and Literature | Philosophy. Psychology. Religion: Aesthetics	1
Language and Literature | Philosophy. Psychology. Religion: Philosophy (General)	1
Language and Literature | Social Sciences	1
Language and Literature | Social Sciences: Social sciences (General)	2
Language and Literature: American literature	3
Language and Literature: American literature | Language and Literature: English literature	2
Language and Literature: American literature | Language and Literature: Literature (General)	1
Language and Literature: American literature | Social Sciences: Communities. Classes. Races	1
Language and Literature: English language	10
Language and Literature: English language | Language and Literature: English literature	6
Language and Literature: English language | Language and Literature: Oriental languages and literatures	1
Language and Literature: English language | Language and Literature: Philology. Linguistics	1
Language and Literature: English language | Language and Literature: Philology. Linguistics: Language. Linguistic theory. Comparative grammar	1
Language and Literature: English language | Language and Literature: Philology. Linguistics: Language. Linguistic theory. Comparative grammar: Language acquisition	1
Language and Literature: English language | Social Sciences: Social sciences (General)	1
Language and Literature: English literature	12
Language and Literature: English literature | Language and Literature: French literature - Italian literature - Spanish literature - Portuguese literature	1
Language and Literature: English literature | Language and Literature: French literature - Italian literature - Spanish literature - Portuguese literature | Political science: Colonies and colonization. Emigration and immigration. International migration	1
Language and Literature: English literature | Language and Literature: Literature (General)	1
Language and Literature: French literature - Italian literature - Spanish literature - Portuguese literature	44
Language and Literature: French literature - Italian literature - Spanish literature - Portuguese literature | Bibliography. Library science. Information resources	1
Language and Literature: French literature - Italian literature - Spanish literature - Portuguese literature | Law: Law in general. Comparative and uniform law. Jurisprudence	1
Language and Literature: French literature - Italian literature - Spanish literature - Portuguese literature | Medicine	1
Language and Literature: French literature - Italian literature - Spanish literature - Portuguese literature | Philosophy. Psychology. Religion: Philosophy (General)	1
Language and Literature: French literature - Italian literature - Spanish literature - Portuguese literature | Social Sciences	3
Language and Literature: French literature - Italian literature - Spanish literature - Portuguese literature | Social Sciences: Social sciences (General)	2
Language and Literature: German literature	2
Language and Literature: German literature | Language and Literature: French literature - Italian literature - Spanish literature - Portuguese literature	1
Language and Literature: German literature | Language and Literature: Germanic languages. Scandinavian languages	2
Language and Literature: German literature | Political science: Colonies and colonization. Emigration and immigration. International migration	1
Language and Literature: Germanic languages. Scandinavian languages	5
Language and Literature: Germanic languages. Scandinavian languages: North Germanic. Scandinavian	1
Language and Literature: Greek language and literature. Latin language and literature	4
Language and Literature: Greek language and literature. Latin language and literature | Philosophy. Psychology. Religion: Philosophy (General)	1
Language and Literature: Greek language and literature. Latin language and literature: Greek philology and language	1
Language and Literature: Indo-Iranian languages and literature	2
Language and Literature: Languages and literature of Eastern Asia, Africa, Oceania	7
Language and Literature: Languages and literature of Eastern Asia, Africa, Oceania: African languages and literature	5
Language and Literature: Languages and literature of Eastern Asia, Africa, Oceania: African languages and literature | Language and Literature: French literature - Italian literature - Spanish literature - Portuguese literature	1
Language and Literature: Languages and literature of Eastern Asia, Africa, Oceania: Chinese language and literature	2
Language and Literature: Languages and literature of Eastern Asia, Africa, Oceania: Japanese language and literature	4
Language and Literature: Literature (General)	53
Language and Literature: Literature (General) | Language and Literature: French literature - Italian literature - Spanish literature - Portuguese literature	13
Language and Literature: Literature (General) | Language and Literature: Slavic languages. Baltic languages. Albanian languages	4
Language and Literature: Literature (General) | Law	1
Language and Literature: Literature (General) | Philosophy. Psychology. Religion: Doctrinal Theology	1
Language and Literature: Literature (General) | Philosophy. Psychology. Religion: Philosophy (General)	3
Language and Literature: Literature (General) | Social Sciences	1
Language and Literature: Literature (General) | Social Sciences: The family. Marriage. Woman	1
Language and Literature: Literature (General) | Social Sciences: The family. Marriage. Woman: Women. Feminism	1
Language and Literature: Literature (General): Drama: Dramatic representation. The theater	3
Language and Literature: Literature (General): Drama: Dramatic representation. The theater | Social Sciences: Sociology (General)	1
Language and Literature: Literature (General): Drama: Motion pictures	3
Language and Literature: Literature (General): Drama: Motion pictures | Philosophy. Psychology. Religion: Philosophy (General)	2
Language and Literature: Literature (General): Journalism. The periodical press, etc.	4
Language and Literature: Literature (General): Oratory. Elocution, etc. | Language and Literature: French literature - Italian literature - Spanish literature - Portuguese literature	1
Language and Literature: Literature (General): The performing arts. Show business	4
Language and Literature: Literature (General): The performing arts. Show business | Language and Literature: Literature (General): Drama	1
Language and Literature: Literature (General): The performing arts. Show business | Music and books on Music: Music	1
Language and Literature: Literature (General): The performing arts. Show business | Philosophy. Psychology. Religion: Philosophy (General)	1
Language and Literature: Literature (General): The performing arts. Show business | Social Sciences: Commerce: Business	1
Language and Literature: Norwegian literature	1
Language and Literature: Oriental languages and literatures	4
Language and Literature: Philology. Linguistics	129
Language and Literature: Philology. Linguistics | Language and Literature: English literature	1
Language and Literature: Philology. Linguistics | Language and Literature: French literature - Italian literature - Spanish literature - Portuguese literature	15
Language and Literature: Philology. Linguistics | Language and Literature: Germanic languages. Scandinavian languages	1
Language and Literature: Philology. Linguistics | Language and Literature: Greek language and literature. Latin language and literature	2
Language and Literature: Philology. Linguistics | Language and Literature: Languages and literature of Eastern Asia, Africa, Oceania | Language and Literature: Germanic languages. Scandinavian languages	1
Language and Literature: Philology. Linguistics | Language and Literature: Literature (General)	19
Language and Literature: Philology. Linguistics | Language and Literature: Slavic languages. Baltic languages. Albanian languages	3
Language and Literature: Philology. Linguistics | Language and Literature: Ural-Altaic languages: Finnic. Baltic-Finnic	2
Language and Literature: Philology. Linguistics | Medicine: Otorhinolaryngology	5
Language and Literature: Philology. Linguistics | Philosophy. Psychology. Religion: Judaism	1
Language and Literature: Philology. Linguistics | Philosophy. Psychology. Religion: Philosophy (General)	1
Language and Literature: Philology. Linguistics | Philosophy. Psychology. Religion: Psychology: Consciousness. Cognition	1
Language and Literature: Philology. Linguistics | Social Sciences	1
Language and Literature: Philology. Linguistics | Social Sciences: Social sciences (General)	1
Language and Literature: Philology. Linguistics | Social Sciences: Sociology (General)	1
Language and Literature: Philology. Linguistics: Communication. Mass media	107
Language and Literature: Philology. Linguistics: Communication. Mass media | Bibliography. Library science. Information resources	3
Language and Literature: Philology. Linguistics: Communication. Mass media | Bibliography. Library science. Information resources: Information resources (General)	2
Language and Literature: Philology. Linguistics: Communication. Mass media | Language and Literature: French literature - Italian literature - Spanish literature - Portuguese literature	1
Language and Literature: Philology. Linguistics: Communication. Mass media | Language and Literature: Literature (General)	2
Language and Literature: Philology. Linguistics: Communication. Mass media | Language and Literature: Literature (General): Drama: Motion pictures	1
Language and Literature: Philology. Linguistics: Communication. Mass media | Language and Literature: Literature (General): Journalism. The periodical press, etc.	9
Language and Literature: Philology. Linguistics: Communication. Mass media | Language and Literature: Literature (General): Journalism. The periodical press, etc. | Social Sciences: Commerce: Business: Advertising	1
Language and Literature: Philology. Linguistics: Communication. Mass media | Medicine: Public aspects of medicine	2
Language and Literature: Philology. Linguistics: Communication. Mass media | Philosophy. Psychology. Religion	2
Language and Literature: Philology. Linguistics: Communication. Mass media | Philosophy. Psychology. Religion: Islam. Bahai Faith. Theosophy, etc.: Islam	3
Language and Literature: Philology. Linguistics: Communication. Mass media | Philosophy. Psychology. Religion: Philosophy (General)	1
Language and Literature: Philology. Linguistics: Communication. Mass media | Philosophy. Psychology. Religion: Religions. Mythology. Rationalism: Religion (General)	1
Language and Literature: Philology. Linguistics: Communication. Mass media | Political science	1
Language and Literature: Philology. Linguistics: Communication. Mass media | Political science: Political institutions and public administration (General)	1
Language and Literature: Philology. Linguistics: Communication. Mass media | Science: Astronomy	1
Language and Literature: Philology. Linguistics: Communication. Mass media | Science: Mathematics: Instruments and machines: Electronic computers. Computer science	1
Language and Literature: Philology. Linguistics: Communication. Mass media | Science: Science (General)	1
Language and Literature: Philology. Linguistics: Communication. Mass media | Social Sciences	8
Language and Literature: Philology. Linguistics: Communication. Mass media | Social Sciences: Commerce: Business | Social Sciences: Economic theory. Demography: Economics as a science	1
Language and Literature: Philology. Linguistics: Communication. Mass media | Social Sciences: Commerce: Business: Advertising	1
Language and Literature: Philology. Linguistics: Communication. Mass media | Social Sciences: Communities. Classes. Races	1
Language and Literature: Philology. Linguistics: Communication. Mass media | Social Sciences: Industries. Land use. Labor: Management. Industrial management: Public relations. Industrial publicity	2
Language and Literature: Philology. Linguistics: Communication. Mass media | Social Sciences: Social history and conditions. Social problems. Social reform	1
Language and Literature: Philology. Linguistics: Communication. Mass media | Social Sciences: Social history and conditions. Social problems. Social reform | Social Sciences: Social sciences (General)	1
Language and Literature: Philology. Linguistics: Communication. Mass media | Social Sciences: Social sciences (General)	12
Language and Literature: Philology. Linguistics: Communication. Mass media | Social Sciences: Sociology (General)	6
Language and Literature: Philology. Linguistics: Communication. Mass media: Oral communication. Speech	2
Language and Literature: Philology. Linguistics: Communication. Mass media: Oral communication. Speech | Language and Literature: French literature - Italian literature - Spanish literature - Portuguese literature	1
Language and Literature: Philology. Linguistics: Communication. Mass media: Oral communication. Speech | Language and Literature: Philology. Linguistics: Language. Linguistic theory. Comparative grammar	1
Language and Literature: Philology. Linguistics: Communication. Mass media: Oral communication. Speech | Philosophy. Psychology. Religion: Psychology	1
Language and Literature: Philology. Linguistics: Computational linguistics. Natural language processing	4
Language and Literature: Philology. Linguistics: Computational linguistics. Natural language processing | Language and Literature: Philology. Linguistics: Language. Linguistic theory. Comparative grammar	1
Language and Literature: Philology. Linguistics: Computational linguistics. Natural language processing | Language and Literature: Philology. Linguistics: Language. Linguistic theory. Comparative grammar: Semantics | Language and Literature: Philology. Linguistics: Language. Linguistic theory. Comparative grammar: Lexicography	1
Language and Literature: Philology. Linguistics: Language. Linguistic theory. Comparative grammar	47
Language and Literature: Philology. Linguistics: Language. Linguistic theory. Comparative grammar | Language and Literature: French literature - Italian literature - Spanish literature - Portuguese literature	1
Language and Literature: Philology. Linguistics: Language. Linguistic theory. Comparative grammar | Language and Literature: Greek language and literature. Latin language and literature: Greek philology and language	1
Language and Literature: Philology. Linguistics: Language. Linguistic theory. Comparative grammar | Language and Literature: Literature (General)	1
Language and Literature: Philology. Linguistics: Language. Linguistic theory. Comparative grammar | Language and Literature: Oriental languages and literatures	1
Language and Literature: Philology. Linguistics: Language. Linguistic theory. Comparative grammar | Law: Law in general. Comparative and uniform law. Jurisprudence: Comparative law. International uniform law	1
Language and Literature: Philology. Linguistics: Language. Linguistic theory. Comparative grammar: Discourse analysis	6
Language and Literature: Philology. Linguistics: Language. Linguistic theory. Comparative grammar: Discourse analysis | Language and Literature: French literature - Italian literature - Spanish literature - Portuguese literature	1
Language and Literature: Philology. Linguistics: Language. Linguistic theory. Comparative grammar: Discourse analysis | Language and Literature: Literature (General)	1
Language and Literature: Philology. Linguistics: Language. Linguistic theory. Comparative grammar: Discourse analysis | Language and Literature: Philology. Linguistics: Language. Linguistic theory. Comparative grammar: Lexicography	1
Language and Literature: Philology. Linguistics: Language. Linguistic theory. Comparative grammar: Language acquisition	3
Language and Literature: Philology. Linguistics: Language. Linguistic theory. Comparative grammar: Lexicography	1
Language and Literature: Philology. Linguistics: Language. Linguistic theory. Comparative grammar: Semantics	2
Language and Literature: Philology. Linguistics: Language. Linguistic theory. Comparative grammar: Semantics | Language and Literature: Philology. Linguistics: Language. Linguistic theory. Comparative grammar: Comparative grammar	1
Language and Literature: Philology. Linguistics: Language. Linguistic theory. Comparative grammar: Style. Composition. Rhetoric	1
Language and Literature: Philology. Linguistics: Language. Linguistic theory. Comparative grammar: Style. Composition. Rhetoric | Language and Literature: Literature (General): Oratory. Elocution, etc.	1
Language and Literature: Philology. Linguistics: Language. Linguistic theory. Comparative grammar: Style. Composition. Rhetoric | Language and Literature: Philology. Linguistics: Language. Linguistic theory. Comparative grammar: Discourse analysis | Language and Literature: Literature (General)	1
Language and Literature: Philology. Linguistics: Language. Linguistic theory. Comparative grammar: Translating and interpreting	13
Language and Literature: Philology. Linguistics: Language. Linguistic theory. Comparative grammar: Translating and interpreting | Language and Literature: Literature (General)	2
Language and Literature: Romanic languages	6
Language and Literature: Romanic languages | Language and Literature: French literature - Italian literature - Spanish literature - Portuguese literature	11
Language and Literature: Romanic languages | Language and Literature: Philology. Linguistics	13
Language and Literature: Romanic languages | Language and Literature: Philology. Linguistics | Language and Literature: French literature - Italian literature - Spanish literature - Portuguese literature	1
Language and Literature: Romanic languages | Language and Literature: Philology. Linguistics: Language. Linguistic theory. Comparative grammar	1
Language and Literature: Slavic languages. Baltic languages. Albanian languages	8
Language and Literature: Ural-Altaic languages: Finnic. Baltic-Finnic	1
Law	66
Law | Medicine	1
Law | Political science	2
Law | Political science: International relations	1
Law | Political science: International relations | Social Sciences: Social sciences (General)	1
Law | Political science: Political institutions and public administration (General)	2
Law | Political science: Political science (General)	2
Law | Social Sciences	5
Law | Social Sciences: Commerce	1
Law | Social Sciences: Commerce: Business	1
Law | Social Sciences: Communities. Classes. Races: Urban groups. The city. Urban sociology	1
Law | Social Sciences: Economic theory. Demography: Economics as a science	4
Law | Social Sciences: Industries. Land use. Labor: Economic growth, development, planning	1
Law | Social Sciences: Industries. Land use. Labor: Labor. Work. Working class	2
Law | Social Sciences: Industries. Land use. Labor: Labor. Work. Working class: Labor systems	1
Law | Social Sciences: Social history and conditions. Social problems. Social reform	1
Law | Social Sciences: Social sciences (General)	7
Law: Asia and Eurasia, Africa, Pacific Area, and Antarctica	1
Law: Asia and Eurasia, Africa, Pacific Area, and Antarctica: South Asia. Southeast Asia. East Asia	2
Law: Asia and Eurasia, Africa, Pacific Area, and Antarctica: South Asia. Southeast Asia. East Asia | Political science	1
Law: Islamic law	11
Law: Islamic law | Law: Law in general. Comparative and uniform law. Jurisprudence	1
Law: Islamic law | Philosophy. Psychology. Religion: Islam. Bahai Faith. Theosophy, etc.	2
Law: Islamic law | Philosophy. Psychology. Religion: Islam. Bahai Faith. Theosophy, etc.: Islam	2
Law: Islamic law | Social Sciences: Social sciences (General)	1
Law: Law in general. Comparative and uniform law. Jurisprudence	121
Law: Law in general. Comparative and uniform law. Jurisprudence | Bibliography. Library science. Information resources	2
Law: Law in general. Comparative and uniform law. Jurisprudence | Medicine: Medicine (General)	1
Law: Law in general. Comparative and uniform law. Jurisprudence | Philosophy. Psychology. Religion: Philosophy (General)	1
Law: Law in general. Comparative and uniform law. Jurisprudence | Political science	2
Law: Law in general. Comparative and uniform law. Jurisprudence | Political science: International relations	3
Law: Law in general. Comparative and uniform law. Jurisprudence | Political science: Political institutions and public administration (General)	3
Law: Law in general. Comparative and uniform law. Jurisprudence | Political science: Political science (General)	5
Law: Law in general. Comparative and uniform law. Jurisprudence | Science: Biology (General)	1
Law: Law in general. Comparative and uniform law. Jurisprudence | Social Sciences: Economic history and conditions	1
Law: Law in general. Comparative and uniform law. Jurisprudence | Social Sciences: Finance	1
Law: Law in general. Comparative and uniform law. Jurisprudence | Social Sciences: Social pathology. Social and public welfare. Criminology	1
Law: Law in general. Comparative and uniform law. Jurisprudence | Social Sciences: Social sciences (General)	6
Law: Law in general. Comparative and uniform law. Jurisprudence | Social Sciences: Sociology (General)	2
Law: Law in general. Comparative and uniform law. Jurisprudence | Social Sciences: The family. Marriage. Woman: Women. Feminism	1
Law: Law in general. Comparative and uniform law. Jurisprudence: Comparative law. International uniform law	2
Law: Law in general. Comparative and uniform law. Jurisprudence: Comparative law. International uniform law | Law: Law in general. Comparative and uniform law. Jurisprudence: Private international law. Conflict of laws	1
Law: Law in general. Comparative and uniform law. Jurisprudence: Comparative law. International uniform law | Political science: Political institutions and public administration (General)	1
Law: Law in general. Comparative and uniform law. Jurisprudence: Comparative law. International uniform law: Civil law	3
Law: Law in general. Comparative and uniform law. Jurisprudence: Comparative law. International uniform law: Civil law | Law: Law in general. Comparative and uniform law. Jurisprudence: Comparative law. International uniform law: Public law	2
Law: Law in general. Comparative and uniform law. Jurisprudence: Comparative law. International uniform law: Commercial law	3
Law: Law in general. Comparative and uniform law. Jurisprudence: Comparative law. International uniform law: Commercial law | Law: Law in general. Comparative and uniform law. Jurisprudence: Comparative law. International uniform law: Civil law	1
Law: Law in general. Comparative and uniform law. Jurisprudence: Comparative law. International uniform law: Criminal law and procedure	9
Law: Law in general. Comparative and uniform law. Jurisprudence: Comparative law. International uniform law: Criminal law and procedure | Medicine: Public aspects of medicine	1
Law: Law in general. Comparative and uniform law. Jurisprudence: Comparative law. International uniform law: Criminal law and procedure | Philosophy. Psychology. Religion: Psychology	1
Law: Law in general. Comparative and uniform law. Jurisprudence: Comparative law. International uniform law: Criminal law and procedure | Science: Science (General): Cybernetics	1
Law: Law in general. Comparative and uniform law. Jurisprudence: Comparative law. International uniform law: Criminal law and procedure | Social Sciences: Social pathology. Social and public welfare. Criminology	6
Law: Law in general. Comparative and uniform law. Jurisprudence: Comparative law. International uniform law: Environmental law	4
Law: Law in general. Comparative and uniform law. Jurisprudence: Comparative law. International uniform law: Environmental law | Social Sciences: Industries. Land use. Labor: Economic growth, development, planning	1
Law: Law in general. Comparative and uniform law. Jurisprudence: Comparative law. International uniform law: Medical legislation	3
Law: Law in general. Comparative and uniform law. Jurisprudence: Comparative law. International uniform law: Medical legislation | Medicine: Medicine (General): Medical philosophy. Medical ethics	1
Law: Law in general. Comparative and uniform law. Jurisprudence: Comparative law. International uniform law: Medical legislation | Medicine: Public aspects of medicine	1
Law: Law in general. Comparative and uniform law. Jurisprudence: Comparative law. International uniform law: Public finance	1
Law: Law in general. Comparative and uniform law. Jurisprudence: Comparative law. International uniform law: Public finance | Social Sciences: Economic theory. Demography: Economics as a science	1
Law: Law in general. Comparative and uniform law. Jurisprudence: Comparative law. International uniform law: Public finance | Social Sciences: Finance	3
Law: Law in general. Comparative and uniform law. Jurisprudence: Comparative law. International uniform law: Public finance | Social Sciences: Industries. Land use. Labor: Economic growth, development, planning	2
Law: Law in general. Comparative and uniform law. Jurisprudence: Comparative law. International uniform law: Public finance: Revenue. Taxation. Internal revenue	2
Law: Law in general. Comparative and uniform law. Jurisprudence: Comparative law. International uniform law: Public law	1
Law: Law in general. Comparative and uniform law. Jurisprudence: Comparative law. International uniform law: Public law | Political science: Political institutions and public administration (General)	1
Law: Law in general. Comparative and uniform law. Jurisprudence: Comparative law. International uniform law: Regulation of industry, trade, and commerce. Occupational law	1
Law: Law in general. Comparative and uniform law. Jurisprudence: Comparative law. International uniform law: Regulation of industry, trade, and commerce. Occupational law | Social Sciences: Industries. Land use. Labor: Labor. Work. Working class: Social insurance. Social security. Pension	1
Law: Law in general. Comparative and uniform law. Jurisprudence: Comparative law. International uniform law: Regulation of industry, trade, and commerce. Occupational law: Transportation and communication	2
Law: Law in general. Comparative and uniform law. Jurisprudence: Comparative law. International uniform law: Regulation of industry, trade, and commerce. Occupational law: Transportation and communication | Social Sciences: Industries. Land use. Labor: Management. Industrial management | Social Sciences: Transportation and communications	1
Law: Law in general. Comparative and uniform law. Jurisprudence: Jurisprudence. Philosophy and theory of law	17
Law: Law in general. Comparative and uniform law. Jurisprudence: Jurisprudence. Philosophy and theory of law | Law: Law in general. Comparative and uniform law. Jurisprudence: Comparative law. International uniform law	3
Law: Law in general. Comparative and uniform law. Jurisprudence: Jurisprudence. Philosophy and theory of law | Law: Law in general. Comparative and uniform law. Jurisprudence: Private international law. Conflict of laws	1
Law: Law in general. Comparative and uniform law. Jurisprudence: Jurisprudence. Philosophy and theory of law | Medicine: Medicine (General): Medical philosophy. Medical ethics	1
Law: Law in general. Comparative and uniform law. Jurisprudence: Jurisprudence. Philosophy and theory of law | Philosophy. Psychology. Religion: Psychology	1
Law: Law in general. Comparative and uniform law. Jurisprudence: Jurisprudence. Philosophy and theory of law | Philosophy. Psychology. Religion: Speculative philosophy | Philosophy. Psychology. Religion: Philosophy (General) | Philosophy. Psychology. Religion: Religions. Mythology. Rationalism: Philosophy of religion. Psychology of religion. Religion in relation to other subjects	1
Law: Law in general. Comparative and uniform law. Jurisprudence: Jurisprudence. Philosophy and theory of law | Social Sciences: Finance	1
Law: Law in general. Comparative and uniform law. Jurisprudence: Private international law. Conflict of laws	4
Law: Law in general. Comparative and uniform law. Jurisprudence: Private international law. Conflict of laws | Political science: International relations	1
Law: Law in general. Comparative and uniform law. Jurisprudence: Private international law. Conflict of laws | Social Sciences: Social sciences (General)	1
Law: Law in general. Comparative and uniform law. Jurisprudence: Private international law. Conflict of laws: Social legislation	1
Law: Law in general. Comparative and uniform law. Jurisprudence: Private international law. Conflict of laws: Social legislation | Social Sciences: Social sciences (General)	1
Law: Law of Europe	6
Law: Law of Europe | Law: Law in general. Comparative and uniform law. Jurisprudence	3
Law: Law of Europe: History of Law	2
Law: Law of nations	2
Law: Law of nations | Law: Law in general. Comparative and uniform law. Jurisprudence	4
Law: Law of nations | Social Sciences	1
Medicine	296
Medicine | Philosophy. Psychology. Religion: Psychology	2
Medicine | Science	8
Medicine | Science: Biology (General)	20
Medicine | Science: Biology (General): Cytology	1
Medicine | Science: Biology (General): Genetics	4
Medicine | Science: Human anatomy	2
Medicine | Science: Microbiology	2
Medicine | Science: Physiology	1
Medicine | Social Sciences	3
Medicine | Social Sciences: Industries. Land use. Labor: Labor. Work. Working class: Vocational rehabilitation. Employment of people with disabilities	1
Medicine | Social Sciences: Social history and conditions. Social problems. Social reform	1
Medicine | Social Sciences: Social pathology. Social and public welfare. Criminology	1
Medicine | Social Sciences: Social sciences (General)	1
Medicine | Social Sciences: The family. Marriage. Woman: Men	1
Medicine: Dentistry	100
Medicine: Dentistry | Medicine: Medicine (General)	4
Medicine: Dentistry | Medicine: Medicine (General): Medical physics. Medical radiology. Nuclear medicine	2
Medicine: Dentistry | Medicine: Surgery	2
Medicine: Dermatology	29
Medicine: Dermatology | Medicine: Internal medicine	1
Medicine: Dermatology | Medicine: Internal medicine: Infectious and parasitic diseases	1
Medicine: Dermatology | Medicine: Internal medicine: Specialties of internal medicine: Diseases of the circulatory (Cardiovascular) system | Medicine: Internal medicine: Specialties of internal medicine: Diseases of the genitourinary system. Urology	1
Medicine: Dermatology | Medicine: Internal medicine: Specialties of internal medicine: Immunologic diseases. Allergy	1
Medicine: Dermatology | Medicine: Pediatrics	1
Medicine: Dermatology | Medicine: Surgery	2
Medicine: Dermatology | Science: Biology (General)	1
Medicine: Gynecology and obstetrics	39
Medicine: Gynecology and obstetrics | Medicine: Internal medicine	1
Medicine: Gynecology and obstetrics | Medicine: Internal medicine: Infectious and parasitic diseases	1
Medicine: Gynecology and obstetrics | Medicine: Internal medicine: Neoplasms. Tumors. Oncology. Including cancer and carcinogens	3
Medicine: Gynecology and obstetrics | Medicine: Internal medicine: Special situations and conditions: Geriatrics	1
Medicine: Gynecology and obstetrics | Medicine: Public aspects of medicine	1
Medicine: Gynecology and obstetrics | Science: Biology (General): Reproduction	4
Medicine: Homeopathy	3
Medicine: Internal medicine	25
Medicine: Internal medicine | Medicine: Public aspects of medicine	1
Medicine: Internal medicine | Science: Biology (General)	1
Medicine: Internal medicine | Science: Biology (General): Genetics	2
Medicine: Internal medicine: Infectious and parasitic diseases	55
Medicine: Internal medicine: Infectious and parasitic diseases | Medicine: Public aspects of medicine	3
Medicine: Internal medicine: Infectious and parasitic diseases | Science: Microbiology	5
Medicine: Internal medicine: Infectious and parasitic diseases | Science: Zoology	1
Medicine: Internal medicine: Infectious and parasitic diseases | Social Sciences: Statistics	1
Medicine: Internal medicine: Medical emergencies. Critical care. Intensive care. First aid	39
Medicine: Internal medicine: Medical emergencies. Critical care. Intensive care. First aid | Medicine: Public aspects of medicine	1
Medicine: Internal medicine: Medical emergencies. Critical care. Intensive care. First aid | Military Science	1
Medicine: Internal medicine: Neoplasms. Tumors. Oncology. Including cancer and carcinogens	85
Medicine: Internal medicine: Neoplasms. Tumors. Oncology. Including cancer and carcinogens | Medicine: Internal medicine: Infectious and parasitic diseases	1
Medicine: Internal medicine: Neoplasms. Tumors. Oncology. Including cancer and carcinogens | Medicine: Public aspects of medicine	1
Medicine: Internal medicine: Neoplasms. Tumors. Oncology. Including cancer and carcinogens | Philosophy. Psychology. Religion: Psychology	1
Medicine: Internal medicine: Neoplasms. Tumors. Oncology. Including cancer and carcinogens | Science: Biology (General)	1
Medicine: Internal medicine: Neoplasms. Tumors. Oncology. Including cancer and carcinogens | Science: Biology (General): Cytology	6
Medicine: Internal medicine: Neoplasms. Tumors. Oncology. Including cancer and carcinogens | Science: Biology (General): Genetics	1
Medicine: Internal medicine: Neurosciences. Biological psychiatry. Neuropsychiatry	48
Medicine: Internal medicine: Neurosciences. Biological psychiatry. Neuropsychiatry | Medicine: Internal medicine: Special situations and conditions: Geriatrics	2
Medicine: Internal medicine: Neurosciences. Biological psychiatry. Neuropsychiatry | Philosophy. Psychology. Religion: Philosophy (General)	1
Medicine: Internal medicine: Neurosciences. Biological psychiatry. Neuropsychiatry | Philosophy. Psychology. Religion: Psychology	4
Medicine: Internal medicine: Neurosciences. Biological psychiatry. Neuropsychiatry | Philosophy. Psychology. Religion: Psychology: Consciousness. Cognition	1
Medicine: Internal medicine: Neurosciences. Biological psychiatry. Neuropsychiatry | Science: Biology (General)	2
Medicine: Internal medicine: Neurosciences. Biological psychiatry. Neuropsychiatry | Science: Human anatomy	1
Medicine: Internal medicine: Neurosciences. Biological psychiatry. Neuropsychiatry | Science: Mathematics	1
Medicine: Internal medicine: Neurosciences. Biological psychiatry. Neuropsychiatry | Science: Physiology: Neurophysiology and neuropsychology	4
Medicine: Internal medicine: Neurosciences. Biological psychiatry. Neuropsychiatry | Social Sciences: Sociology (General)	1
Medicine: Internal medicine: Neurosciences. Biological psychiatry. Neuropsychiatry: Neurology. Diseases of the nervous system	53
Medicine: Internal medicine: Neurosciences. Biological psychiatry. Neuropsychiatry: Neurology. Diseases of the nervous system | Medicine: Internal medicine: Special situations and conditions: Geriatrics	2
Medicine: Internal medicine: Neurosciences. Biological psychiatry. Neuropsychiatry: Neurology. Diseases of the nervous system | Science: Biology (General): Genetics	1
Medicine: Internal medicine: Neurosciences. Biological psychiatry. Neuropsychiatry: Neurology. Diseases of the nervous system | Science: Mathematics: Instruments and machines: Electronic computers. Computer science	1
Medicine: Internal medicine: Neurosciences. Biological psychiatry. Neuropsychiatry: Neurology. Diseases of the nervous system | Science: Physiology: Neurophysiology and neuropsychology	2
Medicine: Internal medicine: Neurosciences. Biological psychiatry. Neuropsychiatry: Neurology. Diseases of the nervous system: Psychiatry	37
Medicine: Internal medicine: Neurosciences. Biological psychiatry. Neuropsychiatry: Neurology. Diseases of the nervous system: Psychiatry | Medicine: Internal medicine: Special situations and conditions: Geriatrics	1
Medicine: Internal medicine: Neurosciences. Biological psychiatry. Neuropsychiatry: Neurology. Diseases of the nervous system: Psychiatry | Philosophy. Psychology. Religion: Psychology	5
Medicine: Internal medicine: Neurosciences. Biological psychiatry. Neuropsychiatry: Neurology. Diseases of the nervous system: Psychiatry | Science: Physiology: Neurophysiology and neuropsychology	1
Medicine: Internal medicine: Neurosciences. Biological psychiatry. Neuropsychiatry: Neurology. Diseases of the nervous system: Psychiatry | Social Sciences: Commerce: Business: Industrial psychology	1
Medicine: Internal medicine: Neurosciences. Biological psychiatry. Neuropsychiatry: Neurology. Diseases of the nervous system: Psychiatry: Therapeutics. Psychotherapy	10
Medicine: Internal medicine: Neurosciences. Biological psychiatry. Neuropsychiatry: Neurology. Diseases of the nervous system: Psychiatry: Therapeutics. Psychotherapy | Philosophy. Psychology. Religion	1
Medicine: Internal medicine: Neurosciences. Biological psychiatry. Neuropsychiatry: Neurology. Diseases of the nervous system: Psychiatry: Therapeutics. Psychotherapy | Philosophy. Psychology. Religion: Psychology	2
Medicine: Internal medicine: Neurosciences. Biological psychiatry. Neuropsychiatry: Neurology. Diseases of the nervous system: Psychiatry: Therapeutics. Psychotherapy | Social Sciences: Industries. Land use. Labor: Labor. Work. Working class	1
Medicine: Internal medicine: Special situations and conditions	5
Medicine: Internal medicine: Special situations and conditions | Medicine: Internal medicine: Medical emergencies. Critical care. Intensive care. First aid	2
Medicine: Internal medicine: Special situations and conditions | Philosophy. Psychology. Religion: Psychology	1
Medicine: Internal medicine: Special situations and conditions: Arctic medicine. Tropical medicine	14
Medicine: Internal medicine: Special situations and conditions: Arctic medicine. Tropical medicine | Medicine: Internal medicine: Infectious and parasitic diseases	2
Medicine: Internal medicine: Special situations and conditions: Arctic medicine. Tropical medicine | Medicine: Public aspects of medicine	2
Medicine: Internal medicine: Special situations and conditions: Arctic medicine. Tropical medicine | Medicine: Public aspects of medicine: Toxicology. Poisons | Science: Zoology	1
Medicine: Internal medicine: Special situations and conditions: Arctic medicine. Tropical medicine | Science: Biology (General)	1
Medicine: Internal medicine: Special situations and conditions: Arctic medicine. Tropical medicine | Science: Microbiology	1
Medicine: Internal medicine: Special situations and conditions: Geriatrics	16
Medicine: Internal medicine: Special situations and conditions: Geriatrics | Medicine: Public aspects of medicine	1
Medicine: Internal medicine: Special situations and conditions: Geriatrics | Social Sciences: Social sciences (General)	1
Medicine: Internal medicine: Special situations and conditions: Industrial medicine. Industrial hygiene	5
Medicine: Internal medicine: Special situations and conditions: Industrial medicine. Industrial hygiene | Medicine: Public aspects of medicine	2
Medicine: Internal medicine: Special situations and conditions: Sports medicine	27
Medicine: Internal medicine: Special situations and conditions: Sports medicine | Science: Biology (General)	1
Medicine: Internal medicine: Special situations and conditions: Sports medicine | Science: Physiology	1
Medicine: Internal medicine: Specialties of internal medicine	7
Medicine: Internal medicine: Specialties of internal medicine | Medicine: Internal medicine: Infectious and parasitic diseases	1
Medicine: Internal medicine: Specialties of internal medicine: Diseases of the blood and blood-forming organs	21
Medicine: Internal medicine: Specialties of internal medicine: Diseases of the blood and blood-forming organs | Medicine: Internal medicine: Neoplasms. Tumors. Oncology. Including cancer and carcinogens	2
Medicine: Internal medicine: Specialties of internal medicine: Diseases of the blood and blood-forming organs | Medicine: Internal medicine: Specialties of internal medicine: Immunologic diseases. Allergy	1
Medicine: Internal medicine: Specialties of internal medicine: Diseases of the circulatory (Cardiovascular) system	79
Medicine: Internal medicine: Specialties of internal medicine: Diseases of the circulatory (Cardiovascular) system | Medicine: Internal medicine: Neoplasms. Tumors. Oncology. Including cancer and carcinogens	1
Medicine: Internal medicine: Specialties of internal medicine: Diseases of the circulatory (Cardiovascular) system | Medicine: Internal medicine: Specialties of internal medicine: Diseases of the respiratory system	4
Medicine: Internal medicine: Specialties of internal medicine: Diseases of the digestive system. Gastroenterology	45
Medicine: Internal medicine: Specialties of internal medicine: Diseases of the digestive system. Gastroenterology | Medicine: Internal medicine: Neoplasms. Tumors. Oncology. Including cancer and carcinogens	1
Medicine: Internal medicine: Specialties of internal medicine: Diseases of the endocrine glands. Clinical endocrinology	36
Medicine: Internal medicine: Specialties of internal medicine: Diseases of the endocrine glands. Clinical endocrinology | Medicine: Internal medicine: Specialties of internal medicine: Diseases of the digestive system. Gastroenterology	1
Medicine: Internal medicine: Specialties of internal medicine: Diseases of the endocrine glands. Clinical endocrinology | Medicine: Internal medicine: Specialties of internal medicine: Diseases of the genitourinary system. Urology	1
Medicine: Internal medicine: Specialties of internal medicine: Diseases of the endocrine glands. Clinical endocrinology | Science: Biology (General): Reproduction	1
Medicine: Internal medicine: Specialties of internal medicine: Diseases of the genitourinary system. Urology	46
Medicine: Internal medicine: Specialties of internal medicine: Diseases of the genitourinary system. Urology | Medicine: Internal medicine: Neoplasms. Tumors. Oncology. Including cancer and carcinogens	3
Medicine: Internal medicine: Specialties of internal medicine: Diseases of the musculoskeletal system	23
Medicine: Internal medicine: Specialties of internal medicine: Diseases of the musculoskeletal system | Medicine: Internal medicine: Neoplasms. Tumors. Oncology. Including cancer and carcinogens	1
Medicine: Internal medicine: Specialties of internal medicine: Diseases of the musculoskeletal system | Medicine: Internal medicine: Neurosciences. Biological psychiatry. Neuropsychiatry: Neurology. Diseases of the nervous system	1
Medicine: Internal medicine: Specialties of internal medicine: Diseases of the musculoskeletal system | Science	1
Medicine: Internal medicine: Specialties of internal medicine: Diseases of the musculoskeletal system | Science: Human anatomy	1
Medicine: Internal medicine: Specialties of internal medicine: Diseases of the respiratory system	32
Medicine: Internal medicine: Specialties of internal medicine: Diseases of the respiratory system | Medicine: Internal medicine: Infectious and parasitic diseases	1
Medicine: Internal medicine: Specialties of internal medicine: Diseases of the respiratory system | Medicine: Internal medicine: Neoplasms. Tumors. Oncology. Including cancer and carcinogens	1
Medicine: Internal medicine: Specialties of internal medicine: Diseases of the respiratory system | Medicine: Internal medicine: Specialties of internal medicine: Immunologic diseases. Allergy	1
Medicine: Internal medicine: Specialties of internal medicine: Immunologic diseases. Allergy	32
Medicine: Internal medicine: Specialties of internal medicine: Immunologic diseases. Allergy | Medicine: Internal medicine: Infectious and parasitic diseases	1
Medicine: Internal medicine: Specialties of internal medicine: Immunologic diseases. Allergy | Medicine: Internal medicine: Neoplasms. Tumors. Oncology. Including cancer and carcinogens	1
Medicine: Internal medicine: Specialties of internal medicine: Immunologic diseases. Allergy | Medicine: Internal medicine: Special situations and conditions: Geriatrics	1
Medicine: Internal medicine: Specialties of internal medicine: Immunologic diseases. Allergy | Medicine: Public aspects of medicine: Toxicology. Poisons	1
Medicine: Internal medicine: Specialties of internal medicine: Immunologic diseases. Allergy | Science: Biology (General)	1
Medicine: Internal medicine: Specialties of internal medicine: Nutritional diseases. Deficiency diseases	7
Medicine: Internal medicine: Specialties of internal medicine: Nutritional diseases. Deficiency diseases | Medicine: Public aspects of medicine	2
Medicine: Medicine (General)	327
Medicine: Medicine (General) | Medicine: Internal medicine	4
Medicine: Medicine (General) | Medicine: Internal medicine: Infectious and parasitic diseases	1
Medicine: Medicine (General) | Medicine: Internal medicine: Specialties of internal medicine | Medicine: Public aspects of medicine	1
Medicine: Medicine (General) | Medicine: Pharmacy and materia medica	2
Medicine: Medicine (General) | Medicine: Public aspects of medicine	22
Medicine: Medicine (General) | Medicine: Public aspects of medicine | Social Sciences: Social sciences (General)	1
Medicine: Medicine (General) | Medicine: Public aspects of medicine: Toxicology. Poisons	1
Medicine: Medicine (General) | Medicine: Surgery	2
Medicine: Medicine (General) | Medicine: Surgery | Medicine: Internal medicine: Neoplasms. Tumors. Oncology. Including cancer and carcinogens	1
Medicine: Medicine (General) | Medicine: Therapeutics. Pharmacology	2
Medicine: Medicine (General) | Military Science	2
Medicine: Medicine (General) | Philosophy. Psychology. Religion: Psychology	1
Medicine: Medicine (General) | Science	1
Medicine: Medicine (General) | Science: Biology (General)	18
Medicine: Medicine (General) | Science: Biology (General): Cytology	2
Medicine: Medicine (General) | Science: Biology (General): Genetics	4
Medicine: Medicine (General) | Science: Biology (General): Reproduction	1
Medicine: Medicine (General) | Science: Chemistry	2
Medicine: Medicine (General) | Science: Chemistry: Organic chemistry: Biochemistry	1
Medicine: Medicine (General) | Science: Mathematics	1
Medicine: Medicine (General) | Science: Microbiology	2
Medicine: Medicine (General) | Science: Science (General)	3
Medicine: Medicine (General) | Social Sciences: Social history and conditions. Social problems. Social reform	2
Medicine: Medicine (General) | Social Sciences: Social pathology. Social and public welfare. Criminology	2
Medicine: Medicine (General) | Social Sciences: Social sciences (General)	2
Medicine: Medicine (General) | Social Sciences: Sociology (General)	1
Medicine: Medicine (General): Computer applications to medicine. Medical informatics	25
Medicine: Medicine (General): Computer applications to medicine. Medical informatics | Medicine: Internal medicine: Neoplasms. Tumors. Oncology. Including cancer and carcinogens	1
Medicine: Medicine (General): Computer applications to medicine. Medical informatics | Medicine: Internal medicine: Neurosciences. Biological psychiatry. Neuropsychiatry	1
Medicine: Medicine (General): Computer applications to medicine. Medical informatics | Medicine: Internal medicine: Neurosciences. Biological psychiatry. Neuropsychiatry: Neurology. Diseases of the nervous system	1
Medicine: Medicine (General): Computer applications to medicine. Medical informatics | Medicine: Internal medicine: Neurosciences. Biological psychiatry. Neuropsychiatry: Neurology. Diseases of the nervous system: Psychiatry | Philosophy. Psychology. Religion: Psychology: Consciousness. Cognition	1
Medicine: Medicine (General): Computer applications to medicine. Medical informatics | Medicine: Medicine (General): Medical technology	3
Medicine: Medicine (General): Computer applications to medicine. Medical informatics | Medicine: Pathology	1
Medicine: Medicine (General): Computer applications to medicine. Medical informatics | Medicine: Public aspects of medicine	3
Medicine: Medicine (General): Computer applications to medicine. Medical informatics | Medicine: Surgery	1
Medicine: Medicine (General): Computer applications to medicine. Medical informatics | Science: Biology (General)	3
Medicine: Medicine (General): Computer applications to medicine. Medical informatics | Science: Mathematics: Analysis	1
Medicine: Medicine (General): Computer applications to medicine. Medical informatics | Science: Mathematics: Instruments and machines: Electronic computers. Computer science: Computer software	1
Medicine: Medicine (General): Computer applications to medicine. Medical informatics | Science: Science (General)	1
Medicine: Medicine (General): Computer applications to medicine. Medical informatics | Science: Science (General): Cybernetics: Information theory	1
Medicine: Medicine (General): Computer applications to medicine. Medical informatics | Social Sciences	1
Medicine: Medicine (General): General works	5
Medicine: Medicine (General): General works | Medicine: Internal medicine: Medical emergencies. Critical care. Intensive care. First aid	1
Medicine: Medicine (General): General works | Medicine: Medicine (General): Medical philosophy. Medical ethics	1
Medicine: Medicine (General): History of medicine. Medical expeditions	7
Medicine: Medicine (General): History of medicine. Medical expeditions | Social Sciences	1
Medicine: Medicine (General): Medical philosophy. Medical ethics	9
Medicine: Medicine (General): Medical philosophy. Medical ethics | Philosophy. Psychology. Religion: Ethics	4
Medicine: Medicine (General): Medical philosophy. Medical ethics | Social Sciences: Commerce: Business: Business ethics	1
Medicine: Medicine (General): Medical philosophy. Medical ethics | Social Sciences: Social sciences (General)	1
Medicine: Medicine (General): Medical physics. Medical radiology. Nuclear medicine	37
Medicine: Medicine (General): Medical physics. Medical radiology. Nuclear medicine | Medicine: Internal medicine: Neoplasms. Tumors. Oncology. Including cancer and carcinogens	7
Medicine: Medicine (General): Medical physics. Medical radiology. Nuclear medicine | Medicine: Medicine (General): Medical technology	1
Medicine: Medicine (General): Medical physics. Medical radiology. Nuclear medicine | Medicine: Surgery	1
Medicine: Medicine (General): Medical physics. Medical radiology. Nuclear medicine | Medicine: Therapeutics. Pharmacology	1
Medicine: Medicine (General): Medical physics. Medical radiology. Nuclear medicine | Science: Biology (General)	1
Medicine: Medicine (General): Medical physics. Medical radiology. Nuclear medicine | Science: Physics: Nuclear and particle physics. Atomic energy. Radioactivity: Radioactivity and radioactive substances	1
Medicine: Medicine (General): Medical technology	20
Medicine: Medicine (General): Medical technology | Medicine: Internal medicine: Specialties of internal medicine: Diseases of the circulatory (Cardiovascular) system	1
Medicine: Medicine (General): Medical technology | Medicine: Medicine (General): Medical philosophy. Medical ethics	1
Medicine: Medicine (General): Medical technology | Medicine: Surgery: Orthopedic surgery	1
Medicine: Medicine (General): Medical technology | Science: Biology (General): Genetics	1
Medicine: Nursing	63
Medicine: Nursing | Medicine: Dermatology	1
Medicine: Nursing | Medicine: Gynecology and obstetrics	4
Medicine: Nursing | Medicine: Internal medicine: Medical emergencies. Critical care. Intensive care. First aid	1
Medicine: Nursing | Medicine: Internal medicine: Neoplasms. Tumors. Oncology. Including cancer and carcinogens	1
Medicine: Nursing | Medicine: Internal medicine: Neurosciences. Biological psychiatry. Neuropsychiatry: Neurology. Diseases of the nervous system: Psychiatry	2
Medicine: Nursing | Medicine: Internal medicine: Special situations and conditions: Geriatrics	1
Medicine: Nursing | Medicine: Internal medicine: Specialties of internal medicine: Diseases of the endocrine glands. Clinical endocrinology	1
Medicine: Nursing | Medicine: Internal medicine: Specialties of internal medicine: Diseases of the genitourinary system. Urology	1
Medicine: Nursing | Medicine: Internal medicine: Specialties of internal medicine: Nutritional diseases. Deficiency diseases	1
Medicine: Nursing | Medicine: Medicine (General)	3
Medicine: Nursing | Medicine: Medicine (General) | Medicine: Public aspects of medicine	1
Medicine: Nursing | Medicine: Pediatrics	1
Medicine: Nursing | Medicine: Public aspects of medicine	3
Medicine: Nursing | Medicine: Surgery	2
Medicine: Nursing | Medicine: Therapeutics. Pharmacology	1
Medicine: Nursing | Social Sciences	1
Medicine: Nursing | Social Sciences: Social sciences (General)	1
Medicine: Ophthalmology	40
Medicine: Ophthalmology | Medicine: Internal medicine: Neurosciences. Biological psychiatry. Neuropsychiatry: Neurology. Diseases of the nervous system	1
Medicine: Ophthalmology | Science: Physics: Optics. Light	1
Medicine: Other systems of medicine	13
Medicine: Other systems of medicine | Medicine: Homeopathy	2
Medicine: Other systems of medicine | Medicine: Internal medicine	1
Medicine: Other systems of medicine | Medicine: Internal medicine: Special situations and conditions: Arctic medicine. Tropical medicine | Medicine: Public aspects of medicine | Philosophy. Psychology. Religion: Practical Theology: Practical religion. The Christian life	1
Medicine: Other systems of medicine | Medicine: Therapeutics. Pharmacology	1
Medicine: Other systems of medicine | Science: Botany	1
Medicine: Other systems of medicine: Chiropractic	1
Medicine: Other systems of medicine: Mental healing	1
Medicine: Other systems of medicine: Mental healing | Medicine: Internal medicine: Neurosciences. Biological psychiatry. Neuropsychiatry	1
Medicine: Other systems of medicine: Mental healing | Medicine: Internal medicine: Neurosciences. Biological psychiatry. Neuropsychiatry: Neurology. Diseases of the nervous system: Psychiatry	2
Medicine: Other systems of medicine: Miscellaneous systems and treatments	6
Medicine: Other systems of medicine: Miscellaneous systems and treatments | Medicine: Internal medicine: Specialties of internal medicine: Nutritional diseases. Deficiency diseases	1
Medicine: Other systems of medicine: Miscellaneous systems and treatments | Medicine: Therapeutics. Pharmacology	2
Medicine: Other systems of medicine: Miscellaneous systems and treatments | Music and books on Music: Music	1
Medicine: Other systems of medicine: Miscellaneous systems and treatments | Science	1
Medicine: Other systems of medicine: Osteopathy	4
Medicine: Otorhinolaryngology	17
Medicine: Otorhinolaryngology | Medicine: Internal medicine: Special situations and conditions: Industrial medicine. Industrial hygiene	1
Medicine: Otorhinolaryngology | Medicine: Internal medicine: Specialties of internal medicine: Immunologic diseases. Allergy	1
Medicine: Otorhinolaryngology | Medicine: Surgery	4
Medicine: Pathology	22
Medicine: Pathology | Medicine: Internal medicine: Specialties of internal medicine: Immunologic diseases. Allergy	1
Medicine: Pathology | Science: Biology (General)	1
Medicine: Pathology | Science: Chemistry: Organic chemistry: Biochemistry	1
Medicine: Pathology | Science: Microbiology	1
Medicine: Pediatrics	55
Medicine: Pediatrics | Medicine: Gynecology and obstetrics	4
Medicine: Pediatrics | Medicine: Internal medicine: Medical emergencies. Critical care. Intensive care. First aid	1
Medicine: Pediatrics | Medicine: Internal medicine: Neurosciences. Biological psychiatry. Neuropsychiatry: Neurology. Diseases of the nervous system	1
Medicine: Pediatrics | Medicine: Internal medicine: Neurosciences. Biological psychiatry. Neuropsychiatry: Neurology. Diseases of the nervous system: Psychiatry	1
Medicine: Pediatrics | Medicine: Internal medicine: Specialties of internal medicine: Diseases of the circulatory (Cardiovascular) system	1
Medicine: Pediatrics | Medicine: Internal medicine: Specialties of internal medicine: Diseases of the endocrine glands. Clinical endocrinology	1
Medicine: Pediatrics | Medicine: Internal medicine: Specialties of internal medicine: Diseases of the genitourinary system. Urology	1
Medicine: Pediatrics | Medicine: Internal medicine: Specialties of internal medicine: Diseases of the musculoskeletal system	1
Medicine: Pediatrics | Medicine: Public aspects of medicine	2
Medicine: Pediatrics | Medicine: Surgery	5
Medicine: Pediatrics | Medicine: Surgery: Anesthesiology	1
Medicine: Pediatrics | Philosophy. Psychology. Religion: Psychology	1
Medicine: Pharmacy and materia medica	42
Medicine: Pharmacy and materia medica | Medicine: Public aspects of medicine	1
Medicine: Pharmacy and materia medica | Science: Biology (General): Life	1
Medicine: Pharmacy and materia medica | Science: Botany	1
Medicine: Pharmacy and materia medica | Science: Chemistry	4
Medicine: Pharmacy and materia medica | Science: Chemistry: Analytical chemistry	1
Medicine: Public aspects of medicine	155
Medicine: Public aspects of medicine | Military Science	1
Medicine: Public aspects of medicine | Philosophy. Psychology. Religion: Psychology	1
Medicine: Public aspects of medicine | Science: Biology (General)	1
Medicine: Public aspects of medicine | Science: Biology (General): Evolution	1
Medicine: Public aspects of medicine | Science: Microbiology	1
Medicine: Public aspects of medicine | Social Sciences: Commerce: Business	1
Medicine: Public aspects of medicine | Social Sciences: Communities. Classes. Races	1
Medicine: Public aspects of medicine | Social Sciences: Economic theory. Demography	2
Medicine: Public aspects of medicine | Social Sciences: Industries. Land use. Labor: Labor. Work. Working class	1
Medicine: Public aspects of medicine | Social Sciences: Industries. Land use. Labor: Labor. Work. Working class: Industrial hygiene. Industrial welfare	1
Medicine: Public aspects of medicine | Social Sciences: Social pathology. Social and public welfare. Criminology	5
Medicine: Public aspects of medicine | Social Sciences: Social sciences (General)	2
Medicine: Public aspects of medicine | Social Sciences: Sociology (General)	2
Medicine: Public aspects of medicine | Social Sciences: The family. Marriage. Woman	2
Medicine: Public aspects of medicine | Social Sciences: The family. Marriage. Woman: Women. Feminism	1
Medicine: Public aspects of medicine: Toxicology. Poisons	10
Medicine: Public aspects of medicine: Toxicology. Poisons | Social Sciences: Industries. Land use. Labor: Labor. Work. Working class: Industrial hygiene. Industrial welfare	1
Medicine: Surgery	50
Medicine: Surgery | Medicine: Gynecology and obstetrics	2
Medicine: Surgery | Medicine: Internal medicine	1
Medicine: Surgery | Medicine: Internal medicine: Medical emergencies. Critical care. Intensive care. First aid	2
Medicine: Surgery | Medicine: Internal medicine: Neoplasms. Tumors. Oncology. Including cancer and carcinogens	3
Medicine: Surgery | Medicine: Internal medicine: Neurosciences. Biological psychiatry. Neuropsychiatry	1
Medicine: Surgery | Medicine: Internal medicine: Neurosciences. Biological psychiatry. Neuropsychiatry: Neurology. Diseases of the nervous system	5
Medicine: Surgery | Medicine: Internal medicine: Specialties of internal medicine: Diseases of the circulatory (Cardiovascular) system	7
Medicine: Surgery | Medicine: Internal medicine: Specialties of internal medicine: Diseases of the digestive system. Gastroenterology	3
Medicine: Surgery | Medicine: Internal medicine: Specialties of internal medicine: Diseases of the genitourinary system. Urology	2
Medicine: Surgery | Medicine: Internal medicine: Specialties of internal medicine: Diseases of the musculoskeletal system	2
Medicine: Surgery | Medicine: Internal medicine: Specialties of internal medicine: Diseases of the respiratory system	1
Medicine: Surgery | Medicine: Pathology	1
Medicine: Surgery: Anesthesiology	23
Medicine: Surgery: Anesthesiology | Medicine: Gynecology and obstetrics	1
Medicine: Surgery: Anesthesiology | Medicine: Internal medicine: Medical emergencies. Critical care. Intensive care. First aid	4
Medicine: Surgery: Anesthesiology | Medicine: Internal medicine: Specialties of internal medicine: Diseases of the circulatory (Cardiovascular) system	1
Medicine: Surgery: Anesthesiology | Medicine: Pharmacy and materia medica	1
Medicine: Surgery: Anesthesiology | Medicine: Therapeutics. Pharmacology	1
Medicine: Surgery: Orthopedic surgery	33
Medicine: Surgery: Orthopedic surgery | Medicine: Internal medicine: Neurosciences. Biological psychiatry. Neuropsychiatry: Neurology. Diseases of the nervous system	1
Medicine: Surgery: Orthopedic surgery | Medicine: Internal medicine: Special situations and conditions: Geriatrics	1
Medicine: Surgery: Orthopedic surgery | Medicine: Internal medicine: Specialties of internal medicine: Diseases of the musculoskeletal system	12
Medicine: Therapeutics. Pharmacology	75
Medicine: Therapeutics. Pharmacology | Medicine: Internal medicine: Infectious and parasitic diseases	2
Medicine: Therapeutics. Pharmacology | Medicine: Internal medicine: Infectious and parasitic diseases | Science: Microbiology	1
Medicine: Therapeutics. Pharmacology | Medicine: Internal medicine: Neurosciences. Biological psychiatry. Neuropsychiatry	3
Medicine: Therapeutics. Pharmacology | Medicine: Internal medicine: Specialties of internal medicine: Diseases of the circulatory (Cardiovascular) system	1
Medicine: Therapeutics. Pharmacology | Medicine: Internal medicine: Specialties of internal medicine: Diseases of the genitourinary system. Urology	1
Medicine: Therapeutics. Pharmacology | Medicine: Internal medicine: Specialties of internal medicine: Immunologic diseases. Allergy	1
Medicine: Therapeutics. Pharmacology | Medicine: Pathology | Medicine: Internal medicine: Specialties of internal medicine: Immunologic diseases. Allergy	1
Medicine: Therapeutics. Pharmacology | Medicine: Pharmacy and materia medica	13
Medicine: Therapeutics. Pharmacology | Medicine: Public aspects of medicine	1
Medicine: Therapeutics. Pharmacology | Medicine: Public aspects of medicine: Toxicology. Poisons	2
Medicine: Therapeutics. Pharmacology | Philosophy. Psychology. Religion: Psychology	1
Medicine: Therapeutics. Pharmacology | Science: Chemistry: Organic chemistry: Biochemistry	2
Medicine: Therapeutics. Pharmacology | Social Sciences: Industries. Land use. Labor: Labor. Work. Working class: Industrial hygiene. Industrial welfare	1
Military Science	17
Military Science | Political science	1
Military Science | Political science: International relations | Political science: Political institutions and public administration (General)	1
Military Science | Political science: Political science (General)	2
Music and books on Music	4
Music and books on Music: Literature on music	2
Music and books on Music: Literature on music | Music and books on Music: Music	1
Music and books on Music: Music	18
Music and books on Music: Music | Science: Physics: Acoustics. Sound	1
Music and books on Music: Musical instruction and study	5
Naval Science	7
Naval Science | Medicine	1
Naval Science | Social Sciences: Social sciences (General)	1
Naval Science: Naval architecture. Shipbuilding. Marine engineering	7
Naval Science: Naval architecture. Shipbuilding. Marine engineering | Geography. Anthropology. Recreation: Oceanography	1
Philosophy. Psychology. Religion	20
Philosophy. Psychology. Religion | Science: Mathematics	1
Philosophy. Psychology. Religion | Social Sciences	2
Philosophy. Psychology. Religion | Social Sciences: Communities. Classes. Races	1
Philosophy. Psychology. Religion | Social Sciences: Social sciences (General)	1
Philosophy. Psychology. Religion | Social Sciences: Sociology (General)	1
Philosophy. Psychology. Religion: Aesthetics	5
Philosophy. Psychology. Religion: Aesthetics | Philosophy. Psychology. Religion: Ethics	1
Philosophy. Psychology. Religion: Aesthetics | Philosophy. Psychology. Religion: Philosophy (General)	1
Philosophy. Psychology. Religion: Buddhism	1
Philosophy. Psychology. Religion: Christian Denominations | Philosophy. Psychology. Religion: Christianity | Philosophy. Psychology. Religion: Practical Theology: Practical religion. The Christian life	1
Philosophy. Psychology. Religion: Christian Denominations | Philosophy. Psychology. Religion: Christianity: History	1
Philosophy. Psychology. Religion: Christianity	7
Philosophy. Psychology. Religion: Christianity | Philosophy. Psychology. Religion: Practical Theology: Practical religion. The Christian life	2
Philosophy. Psychology. Religion: Christianity | Science: Mathematics	1
Philosophy. Psychology. Religion: Doctrinal Theology	6
Philosophy. Psychology. Religion: Ethics	9
Philosophy. Psychology. Religion: Ethics | Science: Mathematics: Instruments and machines: Electronic computers. Computer science	1
Philosophy. Psychology. Religion: Ethics | Social Sciences	2
Philosophy. Psychology. Religion: Ethics: Religious ethics	1
Philosophy. Psychology. Religion: Islam. Bahai Faith. Theosophy, etc.	9
Philosophy. Psychology. Religion: Islam. Bahai Faith. Theosophy, etc. | Philosophy. Psychology. Religion: Philosophy (General)	1
Philosophy. Psychology. Religion: Islam. Bahai Faith. Theosophy, etc. | Philosophy. Psychology. Religion: Religions. Mythology. Rationalism	1
Philosophy. Psychology. Religion: Islam. Bahai Faith. Theosophy, etc. | Social Sciences: Economic theory. Demography	1
Philosophy. Psychology. Religion: Islam. Bahai Faith. Theosophy, etc. | Social Sciences: Economic theory. Demography: Economics as a science	1
Philosophy. Psychology. Religion: Islam. Bahai Faith. Theosophy, etc. | Social Sciences: Finance	1
Philosophy. Psychology. Religion: Islam. Bahai Faith. Theosophy, etc. | Social Sciences: Social sciences (General)	1
Philosophy. Psychology. Religion: Islam. Bahai Faith. Theosophy, etc. | Social Sciences: Sociology (General)	1
Philosophy. Psychology. Religion: Islam. Bahai Faith. Theosophy, etc.: Islam	71
Philosophy. Psychology. Religion: Islam. Bahai Faith. Theosophy, etc.: Islam | Philosophy. Psychology. Religion: Practical Theology	1
Philosophy. Psychology. Religion: Islam. Bahai Faith. Theosophy, etc.: Islam | Philosophy. Psychology. Religion: Practical Theology: Practical religion. The Christian life: Moral theology	1
Philosophy. Psychology. Religion: Islam. Bahai Faith. Theosophy, etc.: Islam | Philosophy. Psychology. Religion: Psychology	4
Philosophy. Psychology. Religion: Islam. Bahai Faith. Theosophy, etc.: Islam | Philosophy. Psychology. Religion: Religions. Mythology. Rationalism	1
Philosophy. Psychology. Religion: Islam. Bahai Faith. Theosophy, etc.: Islam | Philosophy. Psychology. Religion: Religions. Mythology. Rationalism: History and principles of religions	1
Philosophy. Psychology. Religion: Islam. Bahai Faith. Theosophy, etc.: Islam | Philosophy. Psychology. Religion: Religions. Mythology. Rationalism: Philosophy of religion. Psychology of religion. Religion in relation to other subjects	1
Philosophy. Psychology. Religion: Islam. Bahai Faith. Theosophy, etc.: Islam | Philosophy. Psychology. Religion: Religions. Mythology. Rationalism: Religion (General)	1
Philosophy. Psychology. Religion: Islam. Bahai Faith. Theosophy, etc.: Islam | Science: Science (General)	1
Philosophy. Psychology. Religion: Islam. Bahai Faith. Theosophy, etc.: Islam | Social Sciences: Commerce: Business	3
Philosophy. Psychology. Religion: Islam. Bahai Faith. Theosophy, etc.: Islam | Social Sciences: Economic theory. Demography: Economics as a science	10
Philosophy. Psychology. Religion: Islam. Bahai Faith. Theosophy, etc.: Islam | Social Sciences: Finance	6
Philosophy. Psychology. Religion: Islam. Bahai Faith. Theosophy, etc.: Islam | Social Sciences: Finance: Banking	2
Philosophy. Psychology. Religion: Islam. Bahai Faith. Theosophy, etc.: Islam | Social Sciences: Social sciences (General)	1
Philosophy. Psychology. Religion: Islam. Bahai Faith. Theosophy, etc.: Islam | Social Sciences: Sociology (General)	1
Philosophy. Psychology. Religion: Judaism	2
Philosophy. Psychology. Religion: Judaism | Philosophy. Psychology. Religion: Philosophy (General)	1
Philosophy. Psychology. Religion: Logic	1
Philosophy. Psychology. Religion: Logic | Philosophy. Psychology. Religion: Philosophy (General)	3
Philosophy. Psychology. Religion: Logic | Science: Mathematics: Instruments and machines: Electronic computers. Computer science	1
Philosophy. Psychology. Religion: Philosophy (General)	89
Philosophy. Psychology. Religion: Philosophy (General) | Philosophy. Psychology. Religion: Ethics	5
Philosophy. Psychology. Religion: Philosophy (General) | Philosophy. Psychology. Religion: Religions. Mythology. Rationalism	1
Philosophy. Psychology. Religion: Philosophy (General) | Philosophy. Psychology. Religion: Religions. Mythology. Rationalism: Philosophy of religion. Psychology of religion. Religion in relation to other subjects	2
Philosophy. Psychology. Religion: Philosophy (General) | Science: Biology (General)	1
Philosophy. Psychology. Religion: Philosophy (General) | Science: Mathematics: Instruments and machines: Electronic computers. Computer science	1
Philosophy. Psychology. Religion: Philosophy (General) | Social Sciences	3
Philosophy. Psychology. Religion: Philosophy (General) | Social Sciences: Economic theory. Demography	1
Philosophy. Psychology. Religion: Philosophy (General) | Social Sciences: Social sciences (General)	3
Philosophy. Psychology. Religion: Philosophy (General) | Social Sciences: Sociology (General)	4
Philosophy. Psychology. Religion: Philosophy (General): By period	1
Philosophy. Psychology. Religion: Philosophy (General): By period: Modern	2
Philosophy. Psychology. Religion: Practical Theology	5
Philosophy. Psychology. Religion: Practical Theology | Philosophy. Psychology. Religion: Doctrinal Theology	4
Philosophy. Psychology. Religion: Practical Theology | Social Sciences: Economic theory. Demography: Economics as a science	1
Philosophy. Psychology. Religion: Practical Theology: Practical religion. The Christian life	3
Philosophy. Psychology. Religion: Practical Theology: Practical religion. The Christian life: Moral theology	3
Philosophy. Psychology. Religion: Practical Theology: Practical religion. The Christian life: Moral theology | Philosophy. Psychology. Religion: Doctrinal Theology	1
Philosophy. Psychology. Religion: Psychology	162
Philosophy. Psychology. Religion: Psychology | Philosophy. Psychology. Religion: Philosophy (General)	2
Philosophy. Psychology. Religion: Psychology | Philosophy. Psychology. Religion: Religions. Mythology. Rationalism: Philosophy of religion. Psychology of religion. Religion in relation to other subjects	1
Philosophy. Psychology. Religion: Psychology | Science: Mathematics	1
Philosophy. Psychology. Religion: Psychology | Science: Physiology: Neurophysiology and neuropsychology	2
Philosophy. Psychology. Religion: Psychology | Social Sciences	3
Philosophy. Psychology. Religion: Psychology | Social Sciences: Commerce: Business: Industrial psychology	3
Philosophy. Psychology. Religion: Psychology | Social Sciences: Communities. Classes. Races: Urban groups. The city. Urban sociology	1
Philosophy. Psychology. Religion: Psychology | Social Sciences: Economic theory. Demography: Economics as a science	2
Philosophy. Psychology. Religion: Psychology | Social Sciences: Industries. Land use. Labor: Labor. Work. Working class: Vocational rehabilitation. Employment of people with disabilities | Social Sciences: Social sciences (General)	1
Philosophy. Psychology. Religion: Psychology | Social Sciences: Industries. Land use. Labor: Management. Industrial management: Organizational behaviour, change and effectiveness. Corporate culture	1
Philosophy. Psychology. Religion: Psychology | Social Sciences: Social history and conditions. Social problems. Social reform	1
Philosophy. Psychology. Religion: Psychology | Social Sciences: Social pathology. Social and public welfare. Criminology	1
Philosophy. Psychology. Religion: Psychology | Social Sciences: Social sciences (General)	5
Philosophy. Psychology. Religion: Psychology | Social Sciences: Sociology (General)	1
Philosophy. Psychology. Religion: Psychology: Consciousness. Cognition	10
Philosophy. Psychology. Religion: Psychology: Consciousness. Cognition | Science: Mathematics: Instruments and machines: Electronic computers. Computer science: Computer software	1
Philosophy. Psychology. Religion: Psychology: Consciousness. Cognition | Science: Physiology: Neurophysiology and neuropsychology	1
Philosophy. Psychology. Religion: Religions. Mythology. Rationalism	11
Philosophy. Psychology. Religion: Religions. Mythology. Rationalism: History and principles of religions | Philosophy. Psychology. Religion: Religions. Mythology. Rationalism: Philosophy of religion. Psychology of religion. Religion in relation to other subjects	1
Philosophy. Psychology. Religion: Religions. Mythology. Rationalism: Philosophy of religion. Psychology of religion. Religion in relation to other subjects	3
Philosophy. Psychology. Religion: Religions. Mythology. Rationalism: Philosophy of religion. Psychology of religion. Religion in relation to other subjects | Philosophy. Psychology. Religion: Practical Theology	1
Philosophy. Psychology. Religion: Religions. Mythology. Rationalism: Religion (General)	20
Philosophy. Psychology. Religion: Religions. Mythology. Rationalism: Religion (General) | Philosophy. Psychology. Religion: Practical Theology	1
Philosophy. Psychology. Religion: Religions. Mythology. Rationalism: Religion (General) | Philosophy. Psychology. Religion: Religions. Mythology. Rationalism: History and principles of religions	2
Philosophy. Psychology. Religion: Religions. Mythology. Rationalism: Religion (General) | Philosophy. Psychology. Religion: Religions. Mythology. Rationalism: Philosophy of religion. Psychology of religion. Religion in relation to other subjects	2
Philosophy. Psychology. Religion: Religions. Mythology. Rationalism: Religion (General) | Philosophy. Psychology. Religion: Religions. Mythology. Rationalism: Religions of the world	1
Philosophy. Psychology. Religion: Religions. Mythology. Rationalism: Religion (General) | Social Sciences	2
Philosophy. Psychology. Religion: Religions. Mythology. Rationalism: Religion (General) | Social Sciences: Social sciences (General)	3
Philosophy. Psychology. Religion: Religions. Mythology. Rationalism: Religion (General) | Social Sciences: The family. Marriage. Woman: Women. Feminism	1
Philosophy. Psychology. Religion: Speculative philosophy | Philosophy. Psychology. Religion: Ethics	1
Philosophy. Psychology. Religion: Speculative philosophy | Philosophy. Psychology. Religion: Philosophy (General)	5
Philosophy. Psychology. Religion: Speculative philosophy: Epistemology. Theory of knowledge | Philosophy. Psychology. Religion: Ethics	2
Philosophy. Psychology. Religion: Speculative philosophy: Epistemology. Theory of knowledge | Philosophy. Psychology. Religion: Speculative philosophy: Metaphysics | Philosophy. Psychology. Religion: Philosophy (General)	1
Philosophy. Psychology. Religion: Speculative philosophy: Epistemology. Theory of knowledge | Science: Science (General)	1
Philosophy. Psychology. Religion: Speculative philosophy: Metaphysics	4
Philosophy. Psychology. Religion: Speculative philosophy: Metaphysics | Philosophy. Psychology. Religion: Philosophy (General)	1
Philosophy. Psychology. Religion: The Bible	5
Philosophy. Psychology. Religion: The Bible | Philosophy. Psychology. Religion: Practical Theology	1
Political science	35
Political science | Philosophy. Psychology. Religion: Ethics	1
Political science | Philosophy. Psychology. Religion: Philosophy (General)	1
Political science | Social Sciences	14
Political science | Social Sciences: Commerce: Business | Social Sciences: Economic theory. Demography: Economics as a science	1
Political science | Social Sciences: Economic theory. Demography	2
Political science | Social Sciences: Industries. Land use. Labor: Economic growth, development, planning	1
Political science | Social Sciences: Social history and conditions. Social problems. Social reform	1
Political science | Social Sciences: Social sciences (General)	3
Political science | Social Sciences: Sociology (General)	1
Political science: Colonies and colonization. Emigration and immigration. International migration	7
Political science: Colonies and colonization. Emigration and immigration. International migration | Social Sciences: Communities. Classes. Races	1
Political science: Colonies and colonization. Emigration and immigration. International migration | Social Sciences: Communities. Classes. Races: Urban groups. The city. Urban sociology: City population. Including children in cities, immigration	4
Political science: Colonies and colonization. Emigration and immigration. International migration | Social Sciences: Economic theory. Demography: Demography. Population. Vital events	1
Political science: Colonies and colonization. Emigration and immigration. International migration | Social Sciences: Sociology (General)	1
Political science: International relations	47
Political science: International relations | Political science: Colonies and colonization. Emigration and immigration. International migration	1
Political science: International relations | Political science: Political institutions and public administration (General)	2
Political science: International relations | Political science: Political science (General)	5
Political science: International relations | Political science: Political theory	1
Political science: International relations | Social Sciences	3
Political science: International relations | Social Sciences: Commerce: Business	1
Political science: International relations | Social Sciences: Industries. Land use. Labor: Economic growth, development, planning	1
Political science: International relations | Social Sciences: Social sciences (General)	2
Political science: International relations | Social Sciences: Sociology (General)	1
Political science: Political institutions and public administration - Asia (Asian studies only)	6
Political science: Political institutions and public administration - Asia (Asian studies only) | Social Sciences: Commerce: Business	1
Political science: Political institutions and public administration - Asia (Asian studies only) | Social Sciences: Communities. Classes. Races: Urban groups. The city. Urban sociology: Urbanization. City and country	1
Political science: Political institutions and public administration - Asia (Asian studies only) | Social Sciences: Social sciences and state - Asia (Asian studies only)	2
Political science: Political institutions and public administration (General)	39
Political science: Political institutions and public administration (General) | Political science: Political science (General)	5
Political science: Political institutions and public administration (General) | Political science: Political theory	1
Political science: Political institutions and public administration (General) | Science: Mathematics: Probabilities. Mathematical statistics	1
Political science: Political institutions and public administration (General) | Social Sciences	1
Political science: Political institutions and public administration (General) | Social Sciences: Commerce	1
Political science: Political institutions and public administration (General) | Social Sciences: Commerce: Business	1
Political science: Political institutions and public administration (General) | Social Sciences: Commerce: Business: Personnel management. Employment management	1
Political science: Political institutions and public administration (General) | Social Sciences: Communities. Classes. Races: Urban groups. The city. Urban sociology: Regional planning	1
Political science: Political institutions and public administration (General) | Social Sciences: Economic theory. Demography	1
Political science: Political institutions and public administration (General) | Social Sciences: Industries. Land use. Labor: Management. Industrial management	1
Political science: Political institutions and public administration (General) | Social Sciences: Social history and conditions. Social problems. Social reform	1
Political science: Political institutions and public administration (General) | Social Sciences: Social pathology. Social and public welfare. Criminology	2
Political science: Political institutions and public administration (General) | Social Sciences: Social sciences (General)	3
Political science: Political science (General)	43
Political science: Political science (General) | Philosophy. Psychology. Religion: Ethics	1
Political science: Political science (General) | Philosophy. Psychology. Religion: Philosophy (General)	2
Political science: Political science (General) | Social Sciences	1
Political science: Political science (General) | Social Sciences: Communities. Classes. Races: Human settlements. Communities	1
Political science: Political science (General) | Social Sciences: Economic theory. Demography: Economics as a science	4
Political science: Political science (General) | Social Sciences: Industries. Land use. Labor: Labor. Work. Working class: Employee participation in management. Employee ownership. Industrial democracy. Works councils	1
Political science: Political science (General) | Social Sciences: Social history and conditions. Social problems. Social reform	1
Political science: Political science (General) | Social Sciences: Social sciences (General)	5
Political science: Political science (General) | Social Sciences: Sociology (General)	3
Political science: Political theory	6
Political science: Political theory | Philosophy. Psychology. Religion: Ethics	1
Political science: Political theory | Philosophy. Psychology. Religion: Philosophy (General)	1
Science	61
Science: Astronomy	7
Science: Astronomy | Science: Geology	1
Science: Astronomy | Science: Physics	1
Science: Astronomy | Science: Physics: Geophysics. Cosmic physics	2
Science: Astronomy: Astrophysics	1
Science: Astronomy: Astrophysics | Science: Mathematics: Analysis	1
Science: Astronomy: Astrophysics | Science: Physics	2
Science: Astronomy: Astrophysics | Science: Physics: Nuclear and particle physics. Atomic energy. Radioactivity	1
Science: Astronomy: Geodesy	6
Science: Astronomy: Geodesy | Science: Physics: Geophysics. Cosmic physics	1
Science: Biology (General)	152
Science: Biology (General) | Science: Botany	10
Science: Biology (General) | Science: Chemistry	3
Science: Biology (General) | Science: Chemistry: Organic chemistry	1
Science: Biology (General) | Science: Chemistry: Organic chemistry: Biochemistry	7
Science: Biology (General) | Science: Geology	1
Science: Biology (General) | Science: Mathematics	3
Science: Biology (General) | Science: Microbiology	7
Science: Biology (General) | Science: Microbiology | Science: Physiology | Science: Zoology | Science: Botany	1
Science: Biology (General) | Science: Natural history (General): General. Including nature conservation, geographical distribution	2
Science: Biology (General) | Science: Physics	1
Science: Biology (General) | Science: Physiology	1
Science: Biology (General) | Science: Zoology	4
Science: Biology (General) | Science: Zoology | Science: Botany	1
Science: Biology (General) | Science: Zoology | Science: Chemistry	1
Science: Biology (General) | Social Sciences: Statistics	1
Science: Biology (General): Cytology	15
Science: Biology (General): Cytology | Science: Physiology: Animal biochemistry	1
Science: Biology (General): Ecology	41
Science: Biology (General): Ecology | Science: Biology (General): Genetics	1
Science: Biology (General): Ecology | Science: Biology (General): Life | Science: Geology	1
Science: Biology (General): Ecology | Science: Geology	1
Science: Biology (General): Ecology | Science: Microbiology: Microbial ecology	1
Science: Biology (General): Ecology | Science: Natural history (General): General. Including nature conservation, geographical distribution	5
Science: Biology (General): Ecology | Science: Physiology: Animal biochemistry	1
Science: Biology (General): Ecology | Science: Zoology	1
Science: Biology (General): Ecology | Science: Zoology | Science: Botany	1
Science: Biology (General): Ecology | Social Sciences: Economic theory. Demography: Economics as a science	1
Science: Biology (General): Evolution	5
Science: Biology (General): Evolution | Science: Biology (General): Cytology	1
Science: Biology (General): Evolution | Science: Biology (General): Ecology	2
Science: Biology (General): Evolution | Science: Biology (General): Genetics	2
Science: Biology (General): Evolution | Science: Biology (General): Life	1
Science: Biology (General): Evolution | Science: Botany: Plant ecology	1
Science: Biology (General): Genetics	41
Science: Biology (General): Genetics | Science: Biology (General): Cytology	3
Science: Biology (General): Genetics | Science: Biology (General): Cytology | Science: Microbiology	1
Science: Biology (General): Genetics | Science: Biology (General): Life	1
Science: Biology (General): Genetics | Science: Chemistry: Organic chemistry: Biochemistry	1
Science: Biology (General): Genetics | Science: Microbiology	2
Science: Biology (General): Genetics | Science: Zoology	1
Science: Biology (General): Life	1
Science: Biology (General): Life | Science: Microbiology	1
Science: Biology (General): Reproduction | Science: Zoology	1
Science: Biology (General): Reproduction | Social Sciences: Social sciences (General)	1
Science: Botany	41
Science: Botany: Plant ecology	4
Science: Chemistry	74
Science: Chemistry: Analytical chemistry	8
Science: Chemistry: Crystallography	5
Science: Chemistry: Crystallography | Science: Chemistry: Analytical chemistry	1
Science: Chemistry: General. Including alchemy	1
Science: Chemistry: Inorganic chemistry	3
Science: Chemistry: Inorganic chemistry | Science: Chemistry: General. Including alchemy	1
Science: Chemistry: Organic chemistry	5
Science: Chemistry: Organic chemistry | Science: Botany	1
Science: Chemistry: Organic chemistry: Biochemistry	16
Science: Chemistry: Physical and theoretical chemistry	1
Science: Geology	55
Science: Geology | Science: Chemistry	1
Science: Geology | Science: Natural history (General): General. Including nature conservation, geographical distribution	1
Science: Geology | Science: Physics: Geophysics. Cosmic physics	1
Science: Geology | Science: Physics: Meteorology. Climatology | Science: Physics: Geophysics. Cosmic physics	1
Science: Geology: Dynamic and structural geology	3
Science: Geology: Dynamic and structural geology | Science: Physics: Geophysics. Cosmic physics	1
Science: Geology: Mineralogy	2
Science: Geology: Paleontology	3
Science: Geology: Paleontology | Science: Botany	1
Science: Geology: Petrology	2
Science: Geology: Stratigraphy	2
Science: Geology: Stratigraphy | Science: Geology: Petrology | Science: Geology: Dynamic and structural geology	1
Science: Geology: Stratigraphy | Social Sciences: Transportation and communications: Cellular telephone services industry. Wireless telephone industry	1
Science: Human anatomy	5
Science: Mathematics	134
Science: Mathematics | Social Sciences	1
Science: Mathematics | Social Sciences: Commerce: Business: Business mathematics. Commercial arithmetic. Including tables, etc.	1
Science: Mathematics | Social Sciences: Industries. Land use. Labor: Industry	1
Science: Mathematics | Social Sciences: Statistics	1
Science: Mathematics: Analysis	7
Science: Mathematics: Analysis | Social Sciences: Commerce: Business: Business mathematics. Commercial arithmetic. Including tables, etc.	1
Science: Mathematics: Instruments and machines: Electronic computers. Computer science	91
Science: Mathematics: Instruments and machines: Electronic computers. Computer science | Science: Mathematics: Analytic mechanics	2
Science: Mathematics: Instruments and machines: Electronic computers. Computer science | Science: Mathematics: Probabilities. Mathematical statistics	1
Science: Mathematics: Instruments and machines: Electronic computers. Computer science | Social Sciences: Economic theory. Demography	1
Science: Mathematics: Instruments and machines: Electronic computers. Computer science | Social Sciences: Economic theory. Demography: Economics as a science	3
Science: Mathematics: Instruments and machines: Electronic computers. Computer science | Social Sciences: Finance	1
Science: Mathematics: Instruments and machines: Electronic computers. Computer science | Social Sciences: Social pathology. Social and public welfare. Criminology	1
Science: Mathematics: Instruments and machines: Electronic computers. Computer science | Social Sciences: Social sciences (General)	1
Science: Mathematics: Instruments and machines: Electronic computers. Computer science: Computer software	18
Science: Mathematics: Instruments and machines: Electronic computers. Computer science: Computer software | Science: Mathematics: Analysis	1
Science: Mathematics: Instruments and machines: Electronic computers. Computer science: Computer software | Social Sciences: Finance	1
Science: Mathematics: Probabilities. Mathematical statistics	8
Science: Mathematics: Probabilities. Mathematical statistics | Science: Mathematics: Analysis	1
Science: Mathematics: Probabilities. Mathematical statistics | Social Sciences	1
Science: Mathematics: Probabilities. Mathematical statistics | Social Sciences: Commerce: Business	1
Science: Mathematics: Probabilities. Mathematical statistics | Social Sciences: Commerce: Business: Business mathematics. Commercial arithmetic. Including tables, etc.	1
Science: Mathematics: Probabilities. Mathematical statistics | Social Sciences: Statistics	1
Science: Microbiology	34
Science: Microbiology | Science: Chemistry	1
Science: Microbiology | Science: Zoology	1
Science: Microbiology: Microbial ecology	4
Science: Natural history (General): General. Including nature conservation, geographical distribution	11
Science: Natural history (General): General. Including nature conservation, geographical distribution | Science: Zoology	1
Science: Natural history (General): Microscopy	1
Science: Physics	50
Science: Physics | Science: Chemistry	2
Science: Physics | Science: Chemistry | Science: Mathematics	1
Science: Physics | Science: Mathematics: Instruments and machines: Electronic computers. Computer science	1
Science: Physics: Acoustics. Sound	1
Science: Physics: Acoustics. Sound | Science: Mathematics: Instruments and machines: Electronic computers. Computer science	1
Science: Physics: Acoustics. Sound | Science: Physics: Optics. Light	1
Science: Physics: Atomic physics. Constitution and properties of matter	3
Science: Physics: Descriptive and experimental mechanics	1
Science: Physics: Descriptive and experimental mechanics | Science: Mathematics	1
Science: Physics: Electricity and magnetism	3
Science: Physics: Electricity and magnetism: Electricity	1
Science: Physics: Geophysics. Cosmic physics	6
Science: Physics: Heat	3
Science: Physics: Heat: Thermodynamics	1
Science: Physics: Heat: Thermodynamics | Science: Mathematics: Analysis	1
Science: Physics: Heat: Thermodynamics | Science: Physics: Descriptive and experimental mechanics	1
Science: Physics: Meteorology. Climatology	20
Science: Physics: Meteorology. Climatology | Science: Physics: Geophysics. Cosmic physics	2
Science: Physics: Meteorology. Climatology | Social Sciences: Economic theory. Demography	1
Science: Physics: Meteorology. Climatology | Social Sciences: Social sciences (General)	2
Science: Physics: Nuclear and particle physics. Atomic energy. Radioactivity	13
Science: Physics: Nuclear and particle physics. Atomic energy. Radioactivity: Elementary particle physics	1
Science: Physics: Optics. Light	5
Science: Physics: Optics. Light | Science: Chemistry	1
Science: Physics: Optics. Light | Science: Mathematics: Instruments and machines: Electronic computers. Computer science	1
Science: Physics: Optics. Light | Science: Physics: Atomic physics. Constitution and properties of matter	1
Science: Physics: Optics. Light | Science: Physics: Descriptive and experimental mechanics	1
Science: Physiology	6
Science: Physiology | Science: Chemistry: Organic chemistry: Biochemistry	2
Science: Physiology: Animal biochemistry | Science: Chemistry: Organic chemistry: Biochemistry	1
Science: Physiology: Neurophysiology and neuropsychology	1
Science: Physiology: Neurophysiology and neuropsychology | Science: Chemistry: Organic chemistry: Biochemistry	1
Science: Science (General)	59
Science: Science (General) | Science: Chemistry: Crystallography	1
Science: Science (General) | Science: Mathematics	1
Science: Science (General) | Social Sciences	1
Science: Science (General) | Social Sciences: Economic theory. Demography: Economics as a science	1
Science: Science (General) | Social Sciences: Social pathology. Social and public welfare. Criminology	1
Science: Science (General) | Social Sciences: Social sciences (General)	26
Science: Science (General) | Social Sciences: Sociology (General)	1
Science: Science (General): Cybernetics	2
Science: Science (General): Cybernetics | Science: Mathematics: Instruments and machines: Electronic computers. Computer science	1
Science: Science (General): Cybernetics | Science: Physics	1
Science: Science (General): Cybernetics: Information theory	2
Science: Science (General): Cybernetics: Information theory | Science: Mathematics: Instruments and machines: Electronic computers. Computer science	1
Science: Zoology	62
Science: Zoology | Science: Botany	6
Social Sciences	162
Social Sciences: Commerce	6
Social Sciences: Commerce | Social Sciences: Economic history and conditions	1
Social Sciences: Commerce | Social Sciences: Economic theory. Demography	1
Social Sciences: Commerce | Social Sciences: Economic theory. Demography: Economics as a science	1
Social Sciences: Commerce | Social Sciences: Finance	5
Social Sciences: Commerce | Social Sciences: Sociology (General)	1
Social Sciences: Commerce: Balance of trade	1
Social Sciences: Commerce: Business	192
Social Sciences: Commerce: Business | Social Sciences: Commerce: Commercial geography. Economic geography	1
Social Sciences: Commerce: Business | Social Sciences: Communities. Classes. Races: Urban groups. The city. Urban sociology: Urban renewal. Urban redevelopment	1
Social Sciences: Commerce: Business | Social Sciences: Economic history and conditions	1
Social Sciences: Commerce: Business | Social Sciences: Economic history and conditions | Social Sciences: Economic theory. Demography: Economics as a science	1
Social Sciences: Commerce: Business | Social Sciences: Economic theory. Demography	6
Social Sciences: Commerce: Business | Social Sciences: Economic theory. Demography: Economics as a science	43
Social Sciences: Commerce: Business | Social Sciences: Economic theory. Demography: Economics as a science | Social Sciences: Social sciences (General)	1
Social Sciences: Commerce: Business | Social Sciences: Finance	21
Social Sciences: Commerce: Business | Social Sciences: Finance: Banking	1
Social Sciences: Commerce: Business | Social Sciences: Social sciences (General)	2
Social Sciences: Commerce: Business | Social Sciences: Sociology (General)	1
Social Sciences: Commerce: Business: Accounting. Bookkeeping	41
Social Sciences: Commerce: Business: Accounting. Bookkeeping | Social Sciences: Economic theory. Demography: Economics as a science	1
Social Sciences: Commerce: Business: Accounting. Bookkeeping | Social Sciences: Finance	18
Social Sciences: Commerce: Business: Business communication. Including business report writing, business correspondence	1
Social Sciences: Commerce: Business: Business ethics	1
Social Sciences: Commerce: Business: Business records management	2
Social Sciences: Commerce: Business: Industrial psychology	1
Social Sciences: Commerce: Business: Industrial psychology | Social Sciences: Commerce: Business: Personnel management. Employment management	1
Social Sciences: Commerce: Business: Marketing. Distribution of products	11
Social Sciences: Commerce: Business: Marketing. Distribution of products | Social Sciences: Finance	2
Social Sciences: Commerce: Business: Markets. Fairs | Social Sciences: Commerce: Business: Marketing. Distribution of products	1
Social Sciences: Commerce: Business: Personnel management. Employment management	7
Social Sciences: Commerce: Business: Shipment of goods. Delivery of goods	1
Social Sciences: Commerce: Business: Shipment of goods. Delivery of goods | Social Sciences: Transportation and communications	2
Social Sciences: Commerce: Business: Vocational guidance. Career development | Social Sciences: Commerce: Business: Personnel management. Employment management	1
Social Sciences: Commerce: Commercial geography. Economic geography | Social Sciences: Economic theory. Demography: Economics as a science	1
Social Sciences: Communities. Classes. Races	5
Social Sciences: Communities. Classes. Races | Social Sciences: Social sciences (General)	1
Social Sciences: Communities. Classes. Races | Social Sciences: Sociology (General)	1
Social Sciences: Communities. Classes. Races: Human settlements. Communities	1
Social Sciences: Communities. Classes. Races: Human settlements. Communities | Social Sciences: Economic theory. Demography: Demography. Population. Vital events	2
Social Sciences: Communities. Classes. Races: Human settlements. Communities | Social Sciences: Sociology (General)	1
Social Sciences: Communities. Classes. Races: Urban groups. The city. Urban sociology	6
Social Sciences: Communities. Classes. Races: Urban groups. The city. Urban sociology | Social Sciences: Social sciences (General)	1
Social Sciences: Communities. Classes. Races: Urban groups. The city. Urban sociology: City planning	4
Social Sciences: Communities. Classes. Races: Urban groups. The city. Urban sociology: City population. Including children in cities, immigration	1
Social Sciences: Communities. Classes. Races: Urban groups. The city. Urban sociology: City population. Including children in cities, immigration | Social Sciences: Economic theory. Demography: Demography. Population. Vital events	1
Social Sciences: Communities. Classes. Races: Urban groups. The city. Urban sociology: Metropolitan areas	1
Social Sciences: Communities. Classes. Races: Urban groups. The city. Urban sociology: Regional economics. Space in economics	8
Social Sciences: Communities. Classes. Races: Urban groups. The city. Urban sociology: Regional economics. Space in economics | Social Sciences: Communities. Classes. Races: Urban groups. The city. Urban sociology: Regional planning	1
Social Sciences: Communities. Classes. Races: Urban groups. The city. Urban sociology: Regional economics. Space in economics | Social Sciences: Economic theory. Demography: Economics as a science	1
Social Sciences: Communities. Classes. Races: Urban groups. The city. Urban sociology: Regional planning	1
Social Sciences: Communities. Classes. Races: Urban groups. The city. Urban sociology: Regional planning | Social Sciences: Communities. Classes. Races: Urban groups. The city. Urban sociology: City planning	2
Social Sciences: Communities. Classes. Races: Urban groups. The city. Urban sociology: Urbanization. City and country	3
Social Sciences: Economic history and conditions	3
Social Sciences: Economic history and conditions | Social Sciences: Economic theory. Demography	5
Social Sciences: Economic history and conditions | Social Sciences: Economic theory. Demography: Economics as a science	12
Social Sciences: Economic history and conditions: Economic geography of the oceans (General)	1
Social Sciences: Economic theory. Demography	17
Social Sciences: Economic theory. Demography | Social Sciences: Social sciences (General)	1
Social Sciences: Economic theory. Demography: Demography. Population. Vital events	14
Social Sciences: Economic theory. Demography: Demography. Population. Vital events | Social Sciences: Social sciences (General)	1
Social Sciences: Economic theory. Demography: Economics as a science	93
Social Sciences: Economic theory. Demography: Economics as a science | Social Sciences: Social sciences (General)	2
Social Sciences: Finance	26
Social Sciences: Finance | Social Sciences: Economic theory. Demography	5
Social Sciences: Finance | Social Sciences: Economic theory. Demography: Economics as a science	5
Social Sciences: Finance: Banking	2
Social Sciences: Finance: Banking | Social Sciences: Economic theory. Demography: Economics as a science	1
Social Sciences: Finance: Insurance	2
Social Sciences: Industries. Land use. Labor	2
Social Sciences: Industries. Land use. Labor | Social Sciences: Commerce: Business	1
Social Sciences: Industries. Land use. Labor | Social Sciences: Economic theory. Demography	1
Social Sciences: Industries. Land use. Labor | Social Sciences: Finance	1
Social Sciences: Industries. Land use. Labor | Social Sciences: Social sciences (General)	1
Social Sciences: Industries. Land use. Labor | Social Sciences: Transportation and communications	1
Social Sciences: Industries. Land use. Labor: Economic growth, development, planning	23
Social Sciences: Industries. Land use. Labor: Economic growth, development, planning | Social Sciences: Commerce: Business	4
Social Sciences: Industries. Land use. Labor: Economic growth, development, planning | Social Sciences: Commerce: Business: Accounting. Bookkeeping | Social Sciences: Commerce: Business: Marketing. Distribution of products	1
Social Sciences: Industries. Land use. Labor: Economic growth, development, planning | Social Sciences: Communities. Classes. Races: Human settlements. Communities	2
Social Sciences: Industries. Land use. Labor: Economic growth, development, planning | Social Sciences: Communities. Classes. Races: Urban groups. The city. Urban sociology: Regional economics. Space in economics	2
Social Sciences: Industries. Land use. Labor: Economic growth, development, planning | Social Sciences: Economic history and conditions	1
Social Sciences: Industries. Land use. Labor: Economic growth, development, planning | Social Sciences: Economic theory. Demography	1
Social Sciences: Industries. Land use. Labor: Economic growth, development, planning | Social Sciences: Economic theory. Demography: Demography. Population. Vital events	1
Social Sciences: Industries. Land use. Labor: Economic growth, development, planning | Social Sciences: Economic theory. Demography: Economics as a science	7
Social Sciences: Industries. Land use. Labor: Economic growth, development, planning | Social Sciences: Finance	2
Social Sciences: Industries. Land use. Labor: Economic growth, development, planning | Social Sciences: Industries. Land use. Labor: Labor. Work. Working class	1
Social Sciences: Industries. Land use. Labor: Economic growth, development, planning | Social Sciences: Social sciences (General)	2
Social Sciences: Industries. Land use. Labor: Industry	2
Social Sciences: Industries. Land use. Labor: Industry: Rural industries | Social Sciences: Sociology (General) | Social Sciences: Social sciences (General)	1
Social Sciences: Industries. Land use. Labor: Industry: Small and medium-sized businesses, artisans, handicrafts, trades | Social Sciences: Commerce: Business	2
Social Sciences: Industries. Land use. Labor: Labor. Work. Working class	4
Social Sciences: Industries. Land use. Labor: Labor. Work. Working class | Social Sciences: Commerce: Business: Industrial psychology	1
Social Sciences: Industries. Land use. Labor: Labor. Work. Working class | Social Sciences: Sociology (General)	2
Social Sciences: Industries. Land use. Labor: Labor. Work. Working class: Labor in politics. Political activity of the working class	2
Social Sciences: Industries. Land use. Labor: Labor. Work. Working class: Labor market. Labor supply. Labor demand	2
Social Sciences: Industries. Land use. Labor: Labor. Work. Working class: Labor market. Labor supply. Labor demand | Social Sciences: Social sciences (General)	1
Social Sciences: Industries. Land use. Labor: Labor. Work. Working class: Labor policy. Labor and the state	1
Social Sciences: Industries. Land use. Labor: Labor. Work. Working class: Labor policy. Labor and the state | Social Sciences: Economic theory. Demography: Economics as a science	1
Social Sciences: Industries. Land use. Labor: Labor. Work. Working class: Professions (General). Professional employees	2
Social Sciences: Industries. Land use. Labor: Labor. Work. Working class: Social insurance. Social security. Pension	1
Social Sciences: Industries. Land use. Labor: Labor. Work. Working class: Trade unions. Labor unions. Workers associations	1
Social Sciences: Industries. Land use. Labor: Labor. Work. Working class: Vocational rehabilitation. Employment of people with disabilities	1
Social Sciences: Industries. Land use. Labor: Labor. Work. Working class: Vocational rehabilitation. Employment of people with disabilities | Social Sciences: Social history and conditions. Social problems. Social reform	1
Social Sciences: Industries. Land use. Labor: Land use	2
Social Sciences: Industries. Land use. Labor: Land use | Social Sciences: Economic history and conditions	1
Social Sciences: Industries. Land use. Labor: Land use: Real estate business	1
Social Sciences: Industries. Land use. Labor: Land use: Real estate business | Social Sciences: Communities. Classes. Races: Urban groups. The city. Urban sociology: Regional economics. Space in economics	1
Social Sciences: Industries. Land use. Labor: Large industry. Factory system. Big business | Social Sciences: Commerce: Business	1
Social Sciences: Industries. Land use. Labor: Management. Industrial management	25
Social Sciences: Industries. Land use. Labor: Management. Industrial management | Social Sciences: Commerce: Business	33
Social Sciences: Industries. Land use. Labor: Management. Industrial management | Social Sciences: Commerce: Business | Social Sciences: Economic theory. Demography: Economics as a science	1
Social Sciences: Industries. Land use. Labor: Management. Industrial management | Social Sciences: Commerce: Business: Accounting. Bookkeeping	1
Social Sciences: Industries. Land use. Labor: Management. Industrial management | Social Sciences: Commerce: Business: Marketing. Distribution of products	2
Social Sciences: Industries. Land use. Labor: Management. Industrial management | Social Sciences: Commerce: Business: Personnel management. Employment management	2
Social Sciences: Industries. Land use. Labor: Management. Industrial management | Social Sciences: Economic theory. Demography	1
Social Sciences: Industries. Land use. Labor: Management. Industrial management | Social Sciences: Economic theory. Demography: Economics as a science	3
Social Sciences: Industries. Land use. Labor: Management. Industrial management | Social Sciences: Finance	2
Social Sciences: Industries. Land use. Labor: Management. Industrial management | Social Sciences: Industries. Land use. Labor: Economic growth, development, planning	2
Social Sciences: Industries. Land use. Labor: Management. Industrial management | Social Sciences: Industries. Land use. Labor: Economic growth, development, planning | Social Sciences: Finance	1
Social Sciences: Industries. Land use. Labor: Management. Industrial management | Social Sciences: Industries. Land use. Labor: Large industry. Factory system. Big business	1
Social Sciences: Industries. Land use. Labor: Management. Industrial management: Competition | Social Sciences: Finance	1
Social Sciences: Industries. Land use. Labor: Management. Industrial management: Management of special enterprises	2
Social Sciences: Industries. Land use. Labor: Management. Industrial management: Organizational behaviour, change and effectiveness. Corporate culture	3
Social Sciences: Industries. Land use. Labor: Management. Industrial management: Organizational behaviour, change and effectiveness. Corporate culture | Social Sciences: Commerce: Business: Industrial psychology	1
Social Sciences: Industries. Land use. Labor: Management. Industrial management: Public relations. Industrial publicity	1
Social Sciences: Industries. Land use. Labor: Management. Industrial management: Risk in industry. Risk management	2
Social Sciences: Industries. Land use. Labor: Management. Industrial management: Risk in industry. Risk management | Social Sciences: Finance	2
Social Sciences: Industries. Land use. Labor: Management. Industrial management: Social responsibility of business	1
Social Sciences: Industries. Land use. Labor: Management. Industrial management: Social responsibility of business | Social Sciences: Commerce: Business: Business ethics	1
Social Sciences: Industries. Land use. Labor: Management. Industrial management: Technological innovations. Automation	4
Social Sciences: Industries. Land use. Labor: Management. Industrial management: Technological innovations. Automation | Social Sciences: Commerce: Business	1
Social Sciences: Industries. Land use. Labor: Management. Industrial management: Technological innovations. Automation | Social Sciences: Industries. Land use. Labor: Economic growth, development, planning	1
Social Sciences: Industries. Land use. Labor: Management. Industrial management: Work groups. Team work in industry. Quality circles | Social Sciences: Industries. Land use. Labor: Labor. Work. Working class	1
Social Sciences: Industries. Land use. Labor: Special industries and trades	1
Social Sciences: Industries. Land use. Labor: Special industries and trades: Agricultural industries	3
Social Sciences: Industries. Land use. Labor: Special industries and trades: Construction industry	2
Social Sciences: Industries. Land use. Labor: Special industries and trades: Energy industries. Energy policy. Fuel trade	3
Social Sciences: Industries. Land use. Labor: Special industries and trades: Pharmaceutical industry	1
Social Sciences: Social history and conditions. Social problems. Social reform	13
Social Sciences: Social history and conditions. Social problems. Social reform | Social Sciences: Communities. Classes. Races	1
Social Sciences: Social history and conditions. Social problems. Social reform | Social Sciences: Economic history and conditions	2
Social Sciences: Social history and conditions. Social problems. Social reform | Social Sciences: Social sciences (General)	3
Social Sciences: Social history and conditions. Social problems. Social reform | Social Sciences: Sociology (General)	2
Social Sciences: Social pathology. Social and public welfare. Criminology	27
Social Sciences: Social pathology. Social and public welfare. Criminology | Social Sciences: Industries. Land use. Labor: Labor. Work. Working class: Labor market. Labor supply. Labor demand	1
Social Sciences: Social pathology. Social and public welfare. Criminology | Social Sciences: Social history and conditions. Social problems. Social reform	2
Social Sciences: Social pathology. Social and public welfare. Criminology | Social Sciences: Social sciences (General)	4
Social Sciences: Social sciences (General)	170
Social Sciences: Social sciences and state - Asia (Asian studies only)	3
Social Sciences: Social sciences and state - Asia (Asian studies only) | Social Sciences: Sociology (General)	1
Social Sciences: Socialism. Communism. Anarchism | Social Sciences: Economic history and conditions	1
Social Sciences: Socialism. Communism. Anarchism | Social Sciences: Social sciences (General)	1
Social Sciences: Societies: secret, benevolent, etc. | Social Sciences: Social sciences (General)	1
Social Sciences: Sociology (General)	68
Social Sciences: Sociology (General) | Social Sciences: Economic theory. Demography	1
Social Sciences: Sociology (General) | Social Sciences: Economic theory. Demography: Economics as a science	2
Social Sciences: Sociology (General) | Social Sciences: Social sciences (General)	7
Social Sciences: Statistics	11
Social Sciences: Statistics | Social Sciences: Commerce: Business	1
Social Sciences: Statistics | Social Sciences: Economic theory. Demography	1
Social Sciences: Statistics | Social Sciences: Economic theory. Demography: Economics as a science	1
Social Sciences: The family. Marriage. Woman	6
Social Sciences: The family. Marriage. Woman | Social Sciences: Social history and conditions. Social problems. Social reform	1
Social Sciences: The family. Marriage. Woman | Social Sciences: Social sciences (General)	2
Social Sciences: The family. Marriage. Woman | Social Sciences: Sociology (General)	1
Social Sciences: The family. Marriage. Woman: Men | Social Sciences: Sociology (General)	1
Social Sciences: The family. Marriage. Woman: Men | Social Sciences: The family. Marriage. Woman: Women. Feminism	1
Social Sciences: The family. Marriage. Woman: Women. Feminism	24
Social Sciences: The family. Marriage. Woman: Women. Feminism | Social Sciences: Communities. Classes. Races	1
Social Sciences: The family. Marriage. Woman: Women. Feminism | Social Sciences: Social history and conditions. Social problems. Social reform	1
Social Sciences: The family. Marriage. Woman: Women. Feminism | Social Sciences: Social sciences (General)	1
Social Sciences: The family. Marriage. Woman: Women. Feminism | Social Sciences: Sociology (General)	1
Social Sciences: Transportation and communications	3
Technology	46
Technology | Geography. Anthropology. Recreation: Environmental sciences	1
Technology | Language and Literature	1
Technology | Law: Law in general. Comparative and uniform law. Jurisprudence	1
Technology | Medicine | Science	2
Technology | Medicine: Dentistry	1
Technology | Philosophy. Psychology. Religion: Philosophy (General)	1
Technology | Philosophy. Psychology. Religion: Psychology	1
Technology | Science	25
Technology | Science: Biology (General)	1
Technology | Science: Biology (General): Ecology	1
Technology | Science: Chemistry	1
Technology | Science: Physics	1
Technology | Science: Physics | Science: Chemistry	1
Technology | Science: Physics: Acoustics. Sound	1
Technology | Science: Physics: Geophysics. Cosmic physics	1
Technology | Science: Physics: Optics. Light	1
Technology | Science: Science (General)	3
Technology | Social Sciences	5
Technology | Social Sciences: Industries. Land use. Labor: Economic growth, development, planning	1
Technology | Social Sciences: Sociology (General)	1
Technology: Bridge engineering | Technology: Building construction	1
Technology: Building construction	19
Technology: Building construction | Social Sciences: Economic theory. Demography	1
Technology: Building construction: Architectural engineering. Structural engineering of buildings	4
Technology: Building construction: Details in building design and construction. Including walls, roofs	1
Technology: Building construction: Systems of building construction. Including fireproof construction, concrete construction	1
Technology: Chemical technology	21
Technology: Chemical technology | Medicine: Dentistry	1
Technology: Chemical technology | Science	3
Technology: Chemical technology | Science: Chemistry	5
Technology: Chemical technology | Science: Physics	1
Technology: Chemical technology | Social Sciences: Industries. Land use. Labor: Special industries and trades: Energy industries. Energy policy. Fuel trade	1
Technology: Chemical technology: Biotechnology	28
Technology: Chemical technology: Biotechnology | Geography. Anthropology. Recreation: Environmental sciences	1
Technology: Chemical technology: Biotechnology | Medicine	2
Technology: Chemical technology: Biotechnology | Medicine: Medicine (General)	3
Technology: Chemical technology: Biotechnology | Medicine: Medicine (General): Computer applications to medicine. Medical informatics | Science: Biology (General)	1
Technology: Chemical technology: Biotechnology | Medicine: Medicine (General): Medical technology	3
Technology: Chemical technology: Biotechnology | Science: Biology (General)	6
Technology: Chemical technology: Biotechnology | Science: Biology (General) | Science: Chemistry: Organic chemistry: Biochemistry	1
Technology: Chemical technology: Biotechnology | Science: Biology (General): Genetics	2
Technology: Chemical technology: Biotechnology | Science: Microbiology	1
Technology: Chemical technology: Biotechnology | Science: Physics	2
Technology: Chemical technology: Biotechnology | Science: Physiology	2
Technology: Chemical technology: Biotechnology | Technology: Chemical technology: Food processing and manufacture	2
Technology: Chemical technology: Chemical engineering	15
Technology: Chemical technology: Chemical engineering | Social Sciences: Industries. Land use. Labor: Special industries and trades: Chemical industries	1
Technology: Chemical technology: Chemical engineering | Technology: Chemical technology: Biotechnology | Medicine: Medicine (General): Medical technology	1
Technology: Chemical technology: Chemical engineering | Technology: Chemical technology: Biotechnology | Medicine: Therapeutics. Pharmacology	1
Technology: Chemical technology: Chemical engineering | Technology: Engineering (General). Civil engineering (General): Environmental engineering	1
Technology: Chemical technology: Chemicals: Manufacture, use, etc. | Science: Chemistry: Inorganic chemistry	1
Technology: Chemical technology: Chemicals: Manufacture, use, etc. | Technology: Chemical technology: Textile bleaching, dyeing, printing, etc. | Science: Biology (General) | Science: Physics	1
Technology: Chemical technology: Clay industries. Ceramics. Glass	6
Technology: Chemical technology: Clay industries. Ceramics. Glass | Medicine	1
Technology: Chemical technology: Fermentation industries. Beverages. Alcohol	2
Technology: Chemical technology: Food processing and manufacture	27
Technology: Chemical technology: Fuel | Social Sciences: Industries. Land use. Labor: Special industries and trades: Energy industries. Energy policy. Fuel trade	1
Technology: Chemical technology: Fuel | Technology: Chemical technology: Biotechnology	1
Technology: Chemical technology: Gas industry	2
Technology: Chemical technology: Industrial electrochemistry | Technology: Chemical technology: Gas industry	1
Technology: Chemical technology: Low temperature engineering. Cryogenic engineering. Refrigeration	1
Technology: Chemical technology: Oils, fats, and waxes	2
Technology: Chemical technology: Oils, fats, and waxes: Petroleum refining. Petroleum products	5
Technology: Chemical technology: Oils, fats, and waxes: Petroleum refining. Petroleum products | Science: Geology: Petrology	1
Technology: Chemical technology: Oils, fats, and waxes: Petroleum refining. Petroleum products | Technology: Chemical technology: Gas industry	1
Technology: Chemical technology: Oils, fats, and waxes: Petroleum refining. Petroleum products | Technology: Engineering (General). Civil engineering (General): Engineering geology. Rock mechanics. Soil mechanics. Underground construction	1
Technology: Chemical technology: Polymers and polymer manufacture	4
Technology: Chemical technology: Polymers and polymer manufacture | Technology: Technology (General): Industrial engineering. Management engineering: Automation	1
Technology: Chemical technology: Textile bleaching, dyeing, printing, etc.	2
Technology: Chemical technology: Textile bleaching, dyeing, printing, etc. | Social Sciences	1
Technology: Chemical technology: Textile bleaching, dyeing, printing, etc. | Social Sciences: Industries. Land use. Labor: Large industry. Factory system. Big business	1
Technology: Electrical engineering. Electronics. Nuclear engineering	44
Technology: Electrical engineering. Electronics. Nuclear engineering | Geography. Anthropology. Recreation: Environmental sciences	1
Technology: Electrical engineering. Electronics. Nuclear engineering | Science: Mathematics: Instruments and machines: Electronic computers. Computer science	2
Technology: Electrical engineering. Electronics. Nuclear engineering | Science: Mathematics: Instruments and machines: Electronic computers. Computer science: Computer software	1
Technology: Electrical engineering. Electronics. Nuclear engineering | Science: Physics	1
Technology: Electrical engineering. Electronics. Nuclear engineering | Science: Physics: Electricity and magnetism: Electricity	1
Technology: Electrical engineering. Electronics. Nuclear engineering | Social Sciences: Industries. Land use. Labor: Economic growth, development, planning	1
Technology: Electrical engineering. Electronics. Nuclear engineering | Social Sciences: Transportation and communications: Cellular telephone services industry. Wireless telephone industry	1
Technology: Electrical engineering. Electronics. Nuclear engineering | Technology: Engineering (General). Civil engineering (General)	2
Technology: Electrical engineering. Electronics. Nuclear engineering | Technology: Engineering (General). Civil engineering (General) | Science: Natural history (General): Microscopy | Science: Physics: Descriptive and experimental mechanics	1
Technology: Electrical engineering. Electronics. Nuclear engineering | Technology: Engineering (General). Civil engineering (General): Transportation engineering	1
Technology: Electrical engineering. Electronics. Nuclear engineering | Technology: Environmental technology. Sanitary engineering	1
Technology: Electrical engineering. Electronics. Nuclear engineering | Technology: Mechanical engineering and machinery	2
Technology: Electrical engineering. Electronics. Nuclear engineering | Technology: Mechanical engineering and machinery | Technology: Engineering (General). Civil engineering (General): Mechanics of engineering. Applied mechanics	1
Technology: Electrical engineering. Electronics. Nuclear engineering | Technology: Mechanical engineering and machinery: Renewable energy sources	1
Technology: Electrical engineering. Electronics. Nuclear engineering | Technology: Technology (General): Industrial engineering. Management engineering: Information technology	2
Technology: Electrical engineering. Electronics. Nuclear engineering: Applications of electric power	3
Technology: Electrical engineering. Electronics. Nuclear engineering: Applications of electric power | Science: Geology	1
Technology: Electrical engineering. Electronics. Nuclear engineering: Distribution or transmission of electric power | Technology: Electrical engineering. Electronics. Nuclear engineering: Production of electric energy or power. Powerplants. Central stations	1
Technology: Electrical engineering. Electronics. Nuclear engineering: Electronics	8
Technology: Electrical engineering. Electronics. Nuclear engineering: Electronics | Medicine: Medicine (General): Medical technology	1
Technology: Electrical engineering. Electronics. Nuclear engineering: Electronics | Science	1
Technology: Electrical engineering. Electronics. Nuclear engineering: Electronics | Science: Mathematics: Instruments and machines: Electronic computers. Computer science	1
Technology: Electrical engineering. Electronics. Nuclear engineering: Electronics | Science: Physics: Optics. Light	1
Technology: Electrical engineering. Electronics. Nuclear engineering: Electronics | Technology: Mechanical engineering and machinery: Control engineering systems. Automatic machinery (General)	1
Technology: Electrical engineering. Electronics. Nuclear engineering: Electronics | Technology: Technology (General): Industrial engineering. Management engineering: Information technology	1
Technology: Electrical engineering. Electronics. Nuclear engineering: Electronics: Computer engineering. Computer hardware	12
Technology: Electrical engineering. Electronics. Nuclear engineering: Electronics: Computer engineering. Computer hardware | Bibliography. Library science. Information resources	1
Technology: Electrical engineering. Electronics. Nuclear engineering: Electronics: Computer engineering. Computer hardware | Science	2
Technology: Electrical engineering. Electronics. Nuclear engineering: Electronics: Computer engineering. Computer hardware | Science: Mathematics: Instruments and machines: Electronic computers. Computer science	12
Technology: Electrical engineering. Electronics. Nuclear engineering: Electronics: Computer engineering. Computer hardware | Science: Mathematics: Instruments and machines: Electronic computers. Computer science: Computer software	3
Technology: Electrical engineering. Electronics. Nuclear engineering: Electronics: Computer engineering. Computer hardware | Technology: Engineering (General). Civil engineering (General)	1
Technology: Electrical engineering. Electronics. Nuclear engineering: Electronics: Computer engineering. Computer hardware | Technology: Engineering (General). Civil engineering (General): Mechanics of engineering. Applied mechanics	1
Technology: Electrical engineering. Electronics. Nuclear engineering: Electronics: Computer engineering. Computer hardware | Technology: Technology (General): Industrial engineering. Management engineering: Information technology	2
Technology: Electrical engineering. Electronics. Nuclear engineering: Electronics: Computer engineering. Computer hardware | Technology: Technology (General): Industrial engineering. Management engineering: Information technology | Science: Mathematics: Instruments and machines: Electronic computers. Computer science	1
Technology: Electrical engineering. Electronics. Nuclear engineering: Materials of engineering and construction. Mechanics of materials	35
Technology: Electrical engineering. Electronics. Nuclear engineering: Materials of engineering and construction. Mechanics of materials | Science: Biology (General)	1
Technology: Electrical engineering. Electronics. Nuclear engineering: Materials of engineering and construction. Mechanics of materials | Science: Chemistry	1
Technology: Electrical engineering. Electronics. Nuclear engineering: Materials of engineering and construction. Mechanics of materials | Science: Mathematics: Instruments and machines: Electronic computers. Computer science: Computer software	1
Technology: Electrical engineering. Electronics. Nuclear engineering: Materials of engineering and construction. Mechanics of materials | Science: Natural history (General): Microscopy	1
Technology: Electrical engineering. Electronics. Nuclear engineering: Materials of engineering and construction. Mechanics of materials | Science: Physics: Atomic physics. Constitution and properties of matter	1
Technology: Electrical engineering. Electronics. Nuclear engineering: Materials of engineering and construction. Mechanics of materials | Technology: Building construction	1
Technology: Electrical engineering. Electronics. Nuclear engineering: Materials of engineering and construction. Mechanics of materials | Technology: Chemical technology	3
Technology: Electrical engineering. Electronics. Nuclear engineering: Materials of engineering and construction. Mechanics of materials | Technology: Chemical technology: Biotechnology	2
Technology: Electrical engineering. Electronics. Nuclear engineering: Materials of engineering and construction. Mechanics of materials | Technology: Chemical technology: Polymers and polymer manufacture	1
Technology: Electrical engineering. Electronics. Nuclear engineering: Materials of engineering and construction. Mechanics of materials | Technology: Electrical engineering. Electronics. Nuclear engineering: Production of electric energy or power. Powerplants. Central stations	1
Technology: Electrical engineering. Electronics. Nuclear engineering: Materials of engineering and construction. Mechanics of materials | Technology: Engineering (General). Civil engineering (General): Applied optics. Photonics	2
Technology: Electrical engineering. Electronics. Nuclear engineering: Materials of engineering and construction. Mechanics of materials | Technology: Mechanical engineering and machinery	3
Technology: Electrical engineering. Electronics. Nuclear engineering: Nuclear engineering. Atomic power	8
Technology: Electrical engineering. Electronics. Nuclear engineering: Nuclear engineering. Atomic power | Political science: International relations	1
Technology: Electrical engineering. Electronics. Nuclear engineering: Nuclear engineering. Atomic power | Science: Physics: Nuclear and particle physics. Atomic energy. Radioactivity	2
Technology: Electrical engineering. Electronics. Nuclear engineering: Production of electric energy or power. Powerplants. Central stations	4
Technology: Electrical engineering. Electronics. Nuclear engineering: Production of electric energy or power. Powerplants. Central stations | Technology: Chemical technology: Industrial electrochemistry	1
Technology: Electrical engineering. Electronics. Nuclear engineering: Production of electric energy or power. Powerplants. Central stations | Technology: Mechanical engineering and machinery: Renewable energy sources	3
Technology: Electrical engineering. Electronics. Nuclear engineering: Production of electric energy or power. Powerplants. Central stations | Technology: Mechanical engineering and machinery: Renewable energy sources | Social Sciences: Industries. Land use. Labor: Special industries and trades: Energy industries. Energy policy. Fuel trade	1
Technology: Electrical engineering. Electronics. Nuclear engineering: Production of electric energy or power. Powerplants. Central stations | Technology: Motor vehicles. Aeronautics. Astronautics	1
Technology: Electrical engineering. Electronics. Nuclear engineering: Telecommunication	16
Technology: Electrical engineering. Electronics. Nuclear engineering: Telecommunication | Language and Literature: Philology. Linguistics: Communication. Mass media	1
Technology: Electrical engineering. Electronics. Nuclear engineering: Telecommunication | Medicine: Medicine (General): Computer applications to medicine. Medical informatics	1
Technology: Electrical engineering. Electronics. Nuclear engineering: Telecommunication | Science: Mathematics: Instruments and machines: Electronic computers. Computer science	1
Technology: Electrical engineering. Electronics. Nuclear engineering: Telecommunication | Technology: Electrical engineering. Electronics. Nuclear engineering: Electronics	3
Technology: Electrical engineering. Electronics. Nuclear engineering: Telecommunication | Technology: Electrical engineering. Electronics. Nuclear engineering: Electronics | Science: Mathematics: Instruments and machines: Electronic computers. Computer science	1
Technology: Electrical engineering. Electronics. Nuclear engineering: Telecommunication | Technology: Electrical engineering. Electronics. Nuclear engineering: Electronics: Computer engineering. Computer hardware	1
Technology: Electrical engineering. Electronics. Nuclear engineering: Telecommunication | Technology: Technology (General): Industrial engineering. Management engineering: Information technology	6
Technology: Engineering (General). Civil engineering (General)	135
Technology: Engineering (General). Civil engineering (General) | Geography. Anthropology. Recreation: Human ecology. Anthropogeography: Settlements: Cities. Urban geography	1
Technology: Engineering (General). Civil engineering (General) | Science	5
Technology: Engineering (General). Civil engineering (General) | Science: Astronomy: Geodesy	1
Technology: Engineering (General). Civil engineering (General) | Science: Biology (General) | Science: Physics | Science: Chemistry	1
Technology: Engineering (General). Civil engineering (General) | Science: Biology (General): Ecology	1
Technology: Engineering (General). Civil engineering (General) | Science: Chemistry	1
Technology: Engineering (General). Civil engineering (General) | Science: Mathematics	2
Technology: Engineering (General). Civil engineering (General) | Science: Mathematics: Instruments and machines: Electronic computers. Computer science	1
Technology: Engineering (General). Civil engineering (General) | Science: Physics	1
Technology: Engineering (General). Civil engineering (General) | Science: Science (General)	14
Technology: Engineering (General). Civil engineering (General) | Social Sciences: Communities. Classes. Races: Urban groups. The city. Urban sociology: City planning	1
Technology: Engineering (General). Civil engineering (General) | Social Sciences: Industries. Land use. Labor: Management. Industrial management: Risk in industry. Risk management	1
Technology: Engineering (General). Civil engineering (General) | Social Sciences: Social sciences (General)	3
Technology: Engineering (General). Civil engineering (General) | Technology: Building construction	4
Technology: Engineering (General). Civil engineering (General) | Technology: Technology (General)	9
Technology: Engineering (General). Civil engineering (General) | Technology: Technology (General) | Technology: Manufactures	1
Technology: Engineering (General). Civil engineering (General) | Technology: Technology (General): Industrial engineering. Management engineering: Information technology	1
Technology: Engineering (General). Civil engineering (General) | Technology: Technology (General): Industrial engineering. Management engineering: Information technology | Science: Mathematics	1
Technology: Engineering (General). Civil engineering (General): Applied optics. Photonics	7
Technology: Engineering (General). Civil engineering (General): Applied optics. Photonics | Medicine: Medicine (General): Medical technology	1
Technology: Engineering (General). Civil engineering (General): Applied optics. Photonics | Medicine: Medicine (General): Medical technology | Science: Physics: Optics. Light	1
Technology: Engineering (General). Civil engineering (General): Applied optics. Photonics | Science: Physics: Optics. Light	5
Technology: Engineering (General). Civil engineering (General): Disasters and engineering	3
Technology: Engineering (General). Civil engineering (General): Disasters and engineering | Geography. Anthropology. Recreation: Environmental sciences	1
Technology: Engineering (General). Civil engineering (General): Disasters and engineering | Science: Biology (General): Ecology | Science: Physics: Meteorology. Climatology	1
Technology: Engineering (General). Civil engineering (General): Engineering design	3
Technology: Engineering (General). Civil engineering (General): Engineering design | Technology: Building construction	1
Technology: Engineering (General). Civil engineering (General): Engineering design | Technology: Building construction: Architectural engineering. Structural engineering of buildings	1
Technology: Engineering (General). Civil engineering (General): Engineering design | Technology: Technology (General): Industrial directories: Industrial safety. Industrial accident prevention	1
Technology: Engineering (General). Civil engineering (General): Engineering design | Technology: Technology (General): Mechanical drawing. Engineering graphics	1
Technology: Engineering (General). Civil engineering (General): Engineering economy	2
Technology: Engineering (General). Civil engineering (General): Engineering economy | Technology: Building construction	2
Technology: Engineering (General). Civil engineering (General): Engineering geology. Rock mechanics. Soil mechanics. Underground construction	3
Technology: Engineering (General). Civil engineering (General): Engineering geology. Rock mechanics. Soil mechanics. Underground construction | Science: Geology	1
Technology: Engineering (General). Civil engineering (General): Engineering geology. Rock mechanics. Soil mechanics. Underground construction | Science: Physics: Geophysics. Cosmic physics | Social Sciences: Commerce: Commercial geography. Economic geography	1
Technology: Engineering (General). Civil engineering (General): Engineering machinery, tools, and implements | Social Sciences: Industries. Land use. Labor: Management. Industrial management: Technological innovations. Automation	1
Technology: Engineering (General). Civil engineering (General): Engineering machinery, tools, and implements | Technology: Engineering (General). Civil engineering (General): Systems engineering	1
Technology: Engineering (General). Civil engineering (General): Environmental engineering	9
Technology: Engineering (General). Civil engineering (General): Environmental engineering | Geography. Anthropology. Recreation: Environmental sciences	3
Technology: Engineering (General). Civil engineering (General): Environmental engineering | Science: Biology (General): Ecology	1
Technology: Engineering (General). Civil engineering (General): Environmental engineering | Technology: Engineering (General). Civil engineering (General): Disasters and engineering	1
Technology: Engineering (General). Civil engineering (General): Environmental engineering | Technology: Engineering (General). Civil engineering (General): Earthwork. Foundations	1
Technology: Engineering (General). Civil engineering (General): Mechanics of engineering. Applied mechanics	13
Technology: Engineering (General). Civil engineering (General): Mechanics of engineering. Applied mechanics | Technology: Engineering (General). Civil engineering (General): Systems engineering	1
Technology: Engineering (General). Civil engineering (General): Structural engineering (General)	2
Technology: Engineering (General). Civil engineering (General): Systems engineering | Technology: Technology (General)	1
Technology: Engineering (General). Civil engineering (General): Systems engineering | Technology: Technology (General): Industrial engineering. Management engineering: Information technology	1
Technology: Engineering (General). Civil engineering (General): Transportation engineering	18
Technology: Engineering (General). Civil engineering (General): Transportation engineering | Law: Law in general. Comparative and uniform law. Jurisprudence: Comparative law. International uniform law: Regulation of industry, trade, and commerce. Occupational law: Transportation and communication | Social Sciences: Commerce: Business | Social Sciences: Transportation and communications	1
Technology: Engineering (General). Civil engineering (General): Transportation engineering | Social Sciences: Communities. Classes. Races: Urban groups. The city. Urban sociology: Urbanization. City and country	1
Technology: Engineering (General). Civil engineering (General): Transportation engineering | Social Sciences: Transportation and communications	4
Technology: Engineering (General). Civil engineering (General): Transportation engineering | Technology: Motor vehicles. Aeronautics. Astronautics	1
Technology: Environmental technology. Sanitary engineering	17
Technology: Environmental technology. Sanitary engineering | Geography. Anthropology. Recreation: Environmental sciences	8
Technology: Environmental technology. Sanitary engineering | Geography. Anthropology. Recreation: Environmental sciences | Science: Geology	1
Technology: Environmental technology. Sanitary engineering | Geography. Anthropology. Recreation: Environmental sciences | Science: Physics	1
Technology: Environmental technology. Sanitary engineering | Geography. Anthropology. Recreation: Environmental sciences | Social Sciences: Industries. Land use. Labor: Management. Industrial management: Risk in industry. Risk management	1
Technology: Environmental technology. Sanitary engineering | Medicine	1
Technology: Environmental technology. Sanitary engineering | Medicine: Public aspects of medicine	1
Technology: Environmental technology. Sanitary engineering | Science: Chemistry	1
Technology: Environmental technology. Sanitary engineering | Science: Natural history (General): General. Including nature conservation, geographical distribution	1
Technology: Environmental technology. Sanitary engineering | Social Sciences: Industries. Land use. Labor: Land use	1
Technology: Environmental technology. Sanitary engineering | Technology: Building construction: Architectural engineering. Structural engineering of buildings	1
Technology: Environmental technology. Sanitary engineering | Technology: Chemical technology: Biotechnology | Science: Science (General)	1
Technology: Environmental technology. Sanitary engineering | Technology: Chemical technology: Chemical engineering	1
Technology: Environmental technology. Sanitary engineering | Technology: Engineering (General). Civil engineering (General)	4
Technology: Environmental technology. Sanitary engineering | Technology: Engineering (General). Civil engineering (General) | Social Sciences: Communities. Classes. Races: Urban groups. The city. Urban sociology	1
Technology: Environmental technology. Sanitary engineering | Technology: Engineering (General). Civil engineering (General): Environmental engineering	2
Technology: Environmental technology. Sanitary engineering | Technology: Engineering (General). Civil engineering (General): Environmental engineering | Geography. Anthropology. Recreation: Environmental sciences	1
Technology: Environmental technology. Sanitary engineering | Technology: Mechanical engineering and machinery | Technology: Engineering (General). Civil engineering (General) | Technology: Manufactures	1
Technology: Environmental technology. Sanitary engineering | Technology: Technology (General): Industrial engineering. Management engineering	1
Technology: Environmental technology. Sanitary engineering: Environmental effects of industries and plants	1
Technology: Environmental technology. Sanitary engineering: Environmental effects of industries and plants | Geography. Anthropology. Recreation: Environmental sciences | Science: Biology (General): Genetics	1
Technology: Environmental technology. Sanitary engineering: Environmental effects of industries and plants | Technology: Mechanical engineering and machinery: Renewable energy sources | Geography. Anthropology. Recreation: Environmental sciences	1
Technology: Environmental technology. Sanitary engineering: Environmental pollution	2
Technology: Environmental technology. Sanitary engineering: Environmental pollution | Geography. Anthropology. Recreation: Environmental sciences	2
Technology: Environmental technology. Sanitary engineering: Environmental pollution | Science	1
Technology: Environmental technology. Sanitary engineering: Environmental pollution | Technology: Environmental technology. Sanitary engineering: Environmental protection | Geography. Anthropology. Recreation: Environmental sciences	1
Technology: Environmental technology. Sanitary engineering: Environmental protection	3
Technology: Environmental technology. Sanitary engineering: Environmental protection | Geography. Anthropology. Recreation: Environmental sciences	2
Technology: Environmental technology. Sanitary engineering: Environmental protection | Technology: Engineering (General). Civil engineering (General): Disasters and engineering	1
Technology: Environmental technology. Sanitary engineering: Special types of environment | Geography. Anthropology. Recreation: Environmental sciences	1
[truncated: 156 more rows]

## Sheet: Original data
Journal title	Journal URL	Alternative title	Journal ISSN (print version)	Journal EISSN (online version)	Publisher	Society or institution	Platform, host or aggregator	Country of publisher	Journal article processing charges (APCs)	APC information URL	APC amount	Currency	Journal article submission fee	Submission fee URL	Submission fee amount	Submission fee currency	Number of articles publish in the last calendar year	Number of articles information URL	Journal waiver policy (for developing country authors etc)	Waiver policy information URL	Digital archiving policy or program(s)	Archiving: national library	Archiving: other	Archiving infomation URL	Journal full-text crawl permission	Permanent article identifiers	Journal provides download statistics	Download statistics information URL	First calendar year journal provided online Open Access content	Full text formats	Keywords	Full text language	URL for the Editorial Board page	Review process	Review process information URL	URL for journal's aims & scope	URL for journal's instructions for authors	Journal plagiarism screening policy	Plagiarism information URL	Average number of weeks between submission and publication	URL for journal's Open Access statement	Machine-readable CC licensing information embedded or displayed in articles	URL to an example page with embedded licensing information	Journal license	License attributes	URL for license terms	Does this journal allow unrestricted reuse in compliance with BOAI?	Deposit policy directory	Author holds copyright without restrictions
Revista de Microbiologia	http://www.scielo.br/scielo.php/script_sci_serial/pid_0001-3714/lng_pt/nrm_iso	Journal of the Brazilian Society for Microbiology	0001-3714	1678-9881	Sociedade Brasileira de Microbiologia		SciELO Brazil	Brazil	No Information																				1998		agricultural sciences, biological sciences	ENGLISH
Anais da Academia Brasileira de Ciências	http://www.scielo.br/scielo.php?script=sci_serial&pid=0001-3765&lng=en&nrm=iso	Annals of the Brazilian Academy of Sciences	0001-3765	1678-2690	Academia Brasileira de Ciências		SciELO Brazil	Brazil	No	http://www.scielo.br/revistas/aabc/iinstruc.htm				http://www.scielo.br/revistas/aabc/iinstruc.htm											Yes	DOI			2000	PDF, HTML, XML	biological sciences, exact and earth sciences, health sciences	English	http://www.scielo.br/revistas/aabc/iedboard.htm	Peer review	http://www.scielo.br/revistas/aabc/iinstruc.htm	http://www.scielo.br/revistas/aabc/iaboutj.htm	http://www.scielo.br/revistas/aabc/iinstruc.htm	Yes	http://www.scielo.br/revistas/aabc/iinstruc.htm	18	http://www.scielo.br/revistas/aabc/isubscrp.htm	Yes	http://www.scielo.br/scielo.php?script=sci_arttext&pid=S0001-37652015000401505&lng=en&nrm=iso&tlng=en	CC BY		http://www.scielo.br/revistas/aabc/iaboutj.htm	Yes		False
ACME	http://riviste.unimi.it/index.php/ACME		0001-494X	2282-0035	Università degli Studi di Milano		OJS	Italy	No													Italian National Library (BNCF)		http://www.depositolegale.it/	Yes	DOI, NBN		they are only for the site manager	2014	PDF	Italian literature, classic literature, linguistics, philosophy	Italian	http://riviste.unimi.it/index.php/ACME/about/editorialTeam	Blind peer review	http://riviste.unimi.it/index.php/ACME/about/editorialPolicies#peerReviewProcess	http://riviste.unimi.it/index.php/ACME/about/editorialPolicies#focusAndScope	http://riviste.unimi.it/index.php/ACME/about/submissions#authorGuidelines			12	http://riviste.unimi.it/index.php/ACME/about/editorialPolicies#openAccessPolicy	Yes	http://riviste.unimi.it/index.php/ACME/article/view/4280	CC BY-NC-ND		http://riviste.unimi.it/index.php/ACME/index	Yes		True
Acta Dermato-Venereologica	http://www.medicaljournals.se/acta		0001-5555	1651-2057	Society for Publication of Acta Dermato-Venereologica		Society for Publication of Acta Dermato-Venereologica	Sweden	Yes	https://www.medicaljournals.se/acta/instructions-to-author	1600	EUR - Euro	Yes	https://www.medicaljournals.se/acta/instructions-to-author	100	EUR - Euro								http://www.ingentaconnect.com/publisher/claiming/resource/mjl/adv		DOI			1998	PDF, HTML	sexually transmitted infections, psoriasis, psychodermatology, skin immunology, skin cancer	English	https://www.medicaljournals.se/acta/editors	Peer review	https://www.medicaljournals.se/acta/instructions-to-author	http://www.medicaljournals.se/acta	https://www.medicaljournals.se/acta/instructions-to-author			20	https://www.medicaljournals.se/acta/open-access-policy			CC BY-NC		https://www.medicaljournals.se/acta/open-access-policy	Yes	Sherpa/Romeo	False
Acta Mycologica	https://pbsociety.org.pl/journals/index.php/am/index		0001-625X	2353-074X	Polish Botanical Society		OJS	Poland	Yes		100	EUR - Euro													Yes	DOI			2006	PDF	mycology, micromycetes, marcomycetes, slime moulds, symbiosis, mycopathology	English	https://pbsociety.org.pl/journals/index.php/am/about/editorialTeam	Double blind peer review	https://pbsociety.org.pl/journals/index.php/am/about/editorialPolicies#peerReviewProcess	https://pbsociety.org.pl/journals/index.php/am/about/editorialPolicies#focusAndScope	https://pbsociety.org.pl/journals/index.php/am/about/submissions#authorGuidelines	Yes	https://pbsociety.org.pl/journals/index.php/am/about/submissions#authorGuidelines	16	https://pbsociety.org.pl/journals/index.php/am/about/editorialPolicies#openAccessPolicy	Yes	https://pbsociety.org.pl/journals/index.php/am/article/view/am.2013.031	CC BY		https://pbsociety.org.pl/journals/index.php/am/about/submissions#copyrightNotice	Yes	Sherpa/Romeo	True
Acta Societatis Botanicorum Poloniae	https://pbsociety.org.pl/journals/index.php/asbp/index		0001-6977	2083-9480	Polish Botanical Society		OJS	Poland	Yes	https://pbsociety.org.pl/journals/index.php/asbp/about/submissions#authorFees	260	EUR - Euro		https://pbsociety.org.pl/journals/index.php/asbp/about/submissions#authorFees									Library of Science, maintained by the Centre for Open Science	https://pbsociety.org.pl/journals/index.php/asbp/about/editorialPolicies#custom-8	Yes	DOI			2011	PDF	botany, plant biology, plant science	English	https://pbsociety.org.pl/journals/index.php/asbp/about/editorialTeam	Double blind peer review	https://pbsociety.org.pl/journals/index.php/asbp/about/editorialPolicies#peerReviewProcess	https://pbsociety.org.pl/journals/index.php/asbp/about/editorialPolicies#focusAndScope	https://pbsociety.org.pl/journals/index.php/asbp/about/submissions#authorGuidelines	Yes	https://pbsociety.org.pl/journals/index.php/asbp/about/submissions#authorGuidelines	16	https://pbsociety.org.pl/journals/index.php/asbp/about/editorialPolicies#openAccessPolicy	Yes	https://pbsociety.org.pl/journals/index.php/asbp/article/view/asbp.2014.044	CC BY		https://pbsociety.org.pl/journals/index.php/asbp/about/submissions#copyrightNotice	Yes	Sherpa/Romeo	True
Acta Stomatologica Croatica	http://hrcak.srce.hr/index.php?show=casopis&id_casopis=6		0001-7019	1846-0410	University of Zagreb. School of Dental Medicine	Croatian dental society, Croatian medical association	Hrcak	Croatia	No	http://hrcak.srce.hr/index.php?show=casopis&id_casopis=6				http://hrcak.srce.hr/index.php?show=casopis&id_casopis=6									Hrcak	http://hrcak.srce.hr/index.php?show=casopis&id_casopis=6	Yes	DOI			1966	PDF	dentistry, odontology, oral health	Croatian, English	http://www.ascro.hr/index.php?id=61	Double blind peer review	http://hrcak.srce.hr/index.php?show=casopis&id_casopis=6	http://hrcak.srce.hr/upute/upute_autorima_Acta_stomatologica_Croatica.pdf	http://hrcak.srce.hr/upute/upute_autorima_Acta_stomatologica_Croatica.pdf			12	http://hrcak.srce.hr/index.php?show=casopis&id_casopis=6			CC BY-NC-ND		http://hrcak.srce.hr/index.php?show=casopis&id_casopis=6	Yes		False
Acta Veterinaria Brno	http://actavet.vfu.cz/		0001-7213	1801-7576	University of Veterinary and Pharmaceutical Sciences, Brno		University of Veterinary and Pharmaceutical Sciences in Brno, Czech Republic	Czech Republic	Yes	http://actavet.vfu.cz/guidelines.html	8000	CZK - Czech Koruna		http://actavet.vfu.cz/guidelines.html															1978	PDF	veterinary medicine, food hygiene, ecology, animal welfare, animal nutrition	English	http://actavet.vfu.cz/board.html	Blind peer review	http://actavet.vfu.cz/guidelines.html	http://actavet.vfu.cz/	http://actavet.vfu.cz/guidelines.html			7	http://actavet.vfu.cz/			CC BY		http://actavet.vfu.cz/	Yes		False
Africa Spectrum	http://hup.sub.uni-hamburg.de/giga/afsp		0002-0397	1868-6869	German Institute of Global and Area Studies (GIGA)		OJS	Germany	No	https://journals.sub.uni-hamburg.de/giga/afsp/about/editorialPolicies#focusAndScope				https://journals.sub.uni-hamburg.de/giga/afsp/about/editorialPolicies#focusAndScope								Deutsche Nationalbibliothek		http://d-nb.info/991346203	Yes	URN	Yes	http://journals.sub.uni-hamburg.de/giga/afsp/about/statisticsOverview	2009	PDF	Africa, politics, social science, culture, economics	English	http://journals.sub.uni-hamburg.de/giga/afsp/about/editorialTeam	Double blind peer review	http://journals.sub.uni-hamburg.de/giga/afsp/about/editorialPolicies#peerReviewProcess	http://journals.sub.uni-hamburg.de/giga/afsp/about/editorialPolicies#focusAndScope	http://journals.giga-hamburg.de/index.php/afsp/about/submissions			20	http://journals.sub.uni-hamburg.de/giga/afsp/about/editorialPolicies#openAccessPolicy			CC BY-ND		http://journals.giga-hamburg.de/index.php/afsp/about/submissions#copyrightNotice	Yes		True
Revista Alergia México	http://revistaalergia.mx/ojs/index.php/ram		0002-5151	2448-9190	Colegio Mexicano de Inmunología Clínica y Alergia, A.C.	Colegio Mexicano de Inmunología Clínica y Alergia, A.C.	OJS	Mexico	No	http://revistaalergia.mx/ojs/index.php/ram/about/editorialPolicies#custom-2				http://revistaalergia.mx/ojs/index.php/ram/about/editorialPolicies#custom-2											Yes				2014	PDF, HTML	clinical inmunology, clinical allergy, clinical research	Spanish; Castilian	http://revistaalergia.mx/ojs/index.php/ram/about/editorialTeam	Double blind peer review	http://revistaalergia.mx/ojs/index.php/ram/about/editorialPolicies#peerReviewProcess	http://revistaalergia.mx/ojs/index.php/ram/about/editorialPolicies#focusAndScope	http://revistaalergia.mx/ojs/index.php/ram/about/submissions#authorGuidelines			16	http://revistaalergia.mx/ojs/index.php/ram/about/editorialPolicies#openAccessPolicy	Yes	http://revistaalergia.mx/ojs/index.php/ram/article/view/185/425	CC BY-NC		http://revistaalergia.mx/ojs/index.php/ram/about/editorialPolicies#focusAndScope	Yes	Sherpa/Romeo	False
Alfa: Revista de Lingüística	http://www.scielo.br/scielo.php?script=sci_serial&pid=1981-5794&lng=en&nrm=iso	Alfa	0002-5216	1981-5794	Universidade Estadual Paulista Júlio de Mesquita Filho	Universidade Estadual Paulista	SciELO Brazil	Brazil	No	http://www.scielo.br/revistas/alfa/iaboutj.htm				http://www.scielo.br/revistas/alfa/iaboutj.htm											Yes	DOI	Yes	http://www.scielo.br/statjournal.php?lang=en&issn=1981-5794	2011	PDF, HTML, XML	linguistics, language, communication, speech	English, French, Italian, Portuguese, Spanish; Castilian	http://www.scielo.br/revistas/alfa/iedboard.htm	Peer review	http://www.scielo.br/revistas/alfa/iinstruc.htm	http://www.scielo.br/revistas/alfa/paboutj.htm	http://www.scielo.br/revistas/alfa/iinstruc.htm		http://www.scielo.br/revistas/alfa/iinstruc.htm	23	http://www.scielo.br/revistas/alfa/iinstruc.htm	Yes	http://www.scielo.br/scielo.php?script=sci_arttext&pid=S1981-57942015000200255&lng=en&nrm=iso&tlng=en	CC BY		http://www.scielo.br/revistas/alfa/iaboutj.htm	Yes		False
Anali Pravnog Fakulteta u Beogradu	http://scindeks.ceon.rs/journalDetails.aspx?issn=0003-2565&lang=en		0003-2565	2406-2693	University of Belgrade, Faculty of Law, Belgrade, Serbia		SCIndeks: Serbian Citation Index	Serbia	No	http://scindeks.ceon.rs/PublicationPolicy.aspx?issn=0003-2565&lang=en#ppAC				http://scindeks.ceon.rs/PublicationPolicy.aspx?issn=0003-2565&lang=en#ppAC								National Library of Serbia		http://scindeks.ceon.rs/Portrait.aspx?issn=0003-2565	Yes	DOI			2014	PDF	International law, law, civil law, criminal law, public law, international law	English	http://scindeks.ceon.rs/EditorialBoard.aspx?issn=0003-2565&lang=en	Double blind peer review	http://scindeks.ceon.rs/PublicationPolicy.aspx?issn=0003-2565&lang=en#ppRT	http://scindeks.ceon.rs/Portrait.aspx?issn=0003-2565&lang=en	http://scindeks.ceon.rs/InstructionForAuthors.aspx?issn=0003-2565&lang=en			3	http://scindeks.ceon.rs/PublicationPolicy.aspx?issn=0003-2565&lang=en#ppOA			CC BY		http://scindeks.ceon.rs/PublicationPolicy.aspx?issn=0003-2565&lang=en#ppLC	Yes		True
Análise Social	http://analisesocial.ics.ul.pt/		0003-2573	2182-2999	Instituto de Ciências Sociais da Universidade de Lisboa	Instituto de Ciências Sociais da Universidade de Lisboa	SciELO Portugal	Portugal	No	http://analisesocial.ics.ul.pt/?page_id=30				http://analisesocial.ics.ul.pt/?page_id=30							LOCKSS			https://thekeepers.org/purl/issn/0003-2573	Yes				2008	PDF	sociology, social conditions, political science, history	English, Portuguese	http://analisesocial.ics.ul.pt/	Double blind peer review	http://analisesocial.ics.ul.pt/?page_id=402&lang=en	http://analisesocial.ics.ul.pt/?lang=en	http://analisesocial.ics.ul.pt/?page_id=402&lang=en			40	http://analisesocial.ics.ul.pt/			CC BY		http://analisesocial.ics.ul.pt/	Yes	Sherpa/Romeo	False
Angle Orthodontist	http://www.angleorthodontist.org/anglonline/?request=index-html		0003-3219		E.H Angle Education and Research Foundation	Edward H.Angle Society of Orthodontists		United States	No	http://angle.org/page/submit?code=angf-site				http://angle.org/page/submit?code=angf-site											Yes	DOI			2004	PDF, HTML	odontology, dentistry, orthodontics	English	http://www.angle.org/page/editorial-board?code=angf-site	Double blind peer review	http://www.angle.org/page/submit	http://www.angle.org/page/submit	http://www.angle.org/page/submit	Yes	http://www.angle.org/page/submit	45	http://angle.org/page/submit?code=angf-site			Publisher's own license	Attribution, No Commercial Usage	http://angle.org/page/submit?code=angf-site	Yes		False
Archives Animal Breeding	http://www.archives-animal-breeding.net/	Archiv Tierzucht	0003-9438		Copernicus Publications	Leibniz Institute for Farm Animal Biology	Copernicus Publications	Germany	No	http://archives-animal-breeding.net/for_authors/article_processing_charges.html				http://archives-animal-breeding.net/for_authors/article_processing_charges.html					Yes	http://publications.copernicus.org/for_authors/financial_support.html	CLOCKSS, Portico			http://archives-animal-breeding.net/index.html	Yes	DOI	Yes	http://archives-animal-breeding.net/about/article_level_metrics.html	1999	PDF, XML	breeding value, DNA markers, animal husbandry, livestock physiology, animal behaviour, animal nutrition	English	http://archives-animal-breeding.net/editorial_and_advisory_board.html	Peer review	http://archives-animal-breeding.net/peer_review/review_process.html	http://archives-animal-breeding.net/about/aims_and_scope.html	http://archives-animal-breeding.net/for_authors/manuscript_preparation.html	Yes	http://archives-animal-breeding.net/for_authors/plagiarism_detection.html	13	http://archives-animal-breeding.net/about/publication_policy.html	Yes	http://www.arch-anim-breed.net/58/7/2015/aab-58-7-2015.xml	CC BY		http://archives-animal-breeding.net/about/licence_and_copyright.html	Yes	Sherpa/Romeo	True
Archivo Español de Arte	http://xn--archivoespaoldearte-53b.revistas.csic.es/index.php/aea/index		0004-0428	1988-8511	Consejo Superior de Investigaciones Científicas		OJS	Spain	No	http://xn--archivoespaoldearte-53b.revistas.csic.es/index.php/aea/about/editorialPolicies#openAccessPolicy				http://xn--archivoespaoldearte-53b.revistas.csic.es/index.php/aea/about/editorialPolicies#openAccessPolicy												DOI			1996	PDF	Spanish cultural heritage, art theory, art criticism	English, Spanish; Castilian	http://xn--archivoespaoldearte-53b.revistas.csic.es/index.php/aea/about/editorialTeam	Double blind peer review	http://archivoespañoldearte.revistas.csic.es/index.php/aea/about/editorialPolicies#peerReviewProcess	http://archivoespañoldearte.revistas.csic.es/index.php/aea/about/editorialPolicies#focusAndScope	http://archivoespañoldearte.revistas.csic.es/index.php/aea/about/submissions#authorGuidelines			48	http://archivoespañoldearte.revistas.csic.es/index.php/aea/about/editorialPolicies#openAccessPolicy			CC BY-NC		http://xn--archivoespaoldearte-53b.revistas.csic.es/index.php/aea/index	Yes		False
Archivos de Zootecnia	http://www.uco.es/organiza/servicios/publica/az/az.htm		0004-0592	1885-4494	Universidad de Córdoba			Spain	No	http://www.uco.es/organiza/servicios/publica/az/az.htm				http://www.uco.es/organiza/servicios/publica/az/az.htm											Yes				1975	PDF	zootechnics, genetics, ethnology, reproduction, economy, animal nutrition	English, French, Italian, Portuguese, Spanish; Castilian	http://www.uco.es/organiza/servicios/publica/az/az.htm	Double blind peer review	http://www.uco.es/organiza/servicios/publica/az/az.htm	http://www.uco.es/organiza/servicios/publica/az/az.htm	http://www.uco.es/organiza/servicios/publica/az/az.htm			43	http://www.uco.es/organiza/servicios/publica/az/az.htm			CC BY-SA		http://www.uco.es/organiza/servicios/publica/az/az.htm	Yes		True
Arhiv za farmaciju	https://scindeks.ceon.rs/journaldetails.aspx?issn=0004-1963		0004-1963	2217-8767	Pharmaceutical Association of Serbia, Belgrade, Serbia		SCIndeks: Serbian Citation Index	Serbia	No	https://scindeks.ceon.rs/PublicationPolicy.aspx?issn=0004-1963&amp;lang=en#ppAC				https://scindeks.ceon.rs/PublicationPolicy.aspx?issn=0004-1963&amp;lang=en#ppAC								National Library of Serbia		https://scindeks.ceon.rs/Portrait.aspx?issn=0004-1963	Yes	DOI	Yes	https://scindeks.ceon.rs/article.aspx?query=ISSID%26and%2613740&page=0&sort=8&stype=0&backurl=%2fissue.aspx%3fissue%3d13740	2014	PDF	pharmacy, medicines, community pharmacy, hospital pharmacy	Serbian	https://scindeks.ceon.rs/EditorialBoard.aspx?issn=0004-1963&amp;lang=en	Blind peer review	https://scindeks.ceon.rs/PublicationPolicy.aspx?issn=0004-1963&amp;lang=en#ppRT	https://scindeks.ceon.rs/Portrait.aspx?issn=0004-1963	https://scindeks-clanci.ceon.rs/data/uputstva/0004-1963ue.pdf			12	https://scindeks.ceon.rs/PublicationPolicy.aspx?issn=0004-1963&amp;lang=en#ppOA	Yes	https://scindeks.ceon.rs/article.aspx?artid=0004-19631706333T	CC BY-SA		http://scindeks.ceon.rs/PublicationPolicy.aspx?issn=0004-1963&amp;lang=en#ppLC	Yes		True
Arquivos Brasileiros de Oftalmologia	http://www.scielo.br/scielo.php?script=sci_serial&pid=0004-2749&lng=en&nrm=iso		0004-2749	1678-2925	Conselho Brasileiro de Oftalmologia	órgão oficial do Conselho Brasileiro de Oftalmologia	SciELO Brazil	Brazil	Yes	http://www.scielo.br/revistas/abo/iinstruc.htm	500	BRL - Brazilian Real		http://www.scielo.br/revistas/abo/iinstruc.htm										http://www.scielo.br/revistas/abo/iinstruc.htm	Yes	DOI	Yes	http://www.scielo.br/statjournal.php?lang=pt&issn=0004-2749	2001	PDF, HTML, XML	health sciences, ophthalmology	English	http://www.scielo.br/revistas/abo/iedboard.htm	Blind peer review	http://www.scielo.br/revistas/abo/iinstruc.htm	http://www.scielo.br/revistas/abo/iinstruc.htm	http://www.scielo.br/revistas/abo/iinstruc.htm		http://www.scielo.br/revistas/abo/paboutj.htm	24	http://www.scielo.br/revistas/abo/isubscrp.htm	Yes	http://www.scielo.br/scielo.php?script=sci_arttext&pid=S0004-27492015000300003&lng=en&nrm=iso&tlng=en	CC BY		http://www.scielo.br/revistas/abo/paboutj.htm	Yes		False
Arquivos de Gastroenterologia	http://www.scielo.br/scielo.php?script=sci_serial&pid=0004-2803&lng=en&nrm=iso	Archives of Gastroenterology	0004-2803	1678-4219	Instituto Brasileiro de Estudos e Pesquisas de Gastroenterologia (IBEPEGE)		SciELO Brazil	Brazil	No	http://www.scielo.br/revistas/ag/iinstruc.htm#001				http://www.scielo.br/revistas/ag/iinstruc.htm#001										http://www.scielo.br/revistas/ag/iaboutj.htm	Yes	DOI	Yes	http://www.scielo.br/statjournal.php?lang=en&issn=0004-2803	1999	PDF, HTML, XML	health sciences, Inflammatory bowel disease, Crohn’s disease	English	http://www.scielo.br/revistas/ag/iedboard.htm	Blind peer review	http://www.scielo.br/revistas/ag/iinstruc.htm	http://www.scielo.br/revistas/ag/iinstruc.htm	http://www.scielo.br/revistas/ag/iinstruc.htm			9	http://www.scielo.br/revistas/ag/isubscrp.htm	Yes	http://www.scielo.br/scielo.php?script=sci_arttext&pid=S0004-28032015000200088&lng=en&nrm=iso&tlng=en	CC BY-NC		http://www.scielo.br/revistas/ag/iaboutj.htm	Yes		False
Arquivos de Neuro-Psiquiatria	http://www.scielo.br/scielo.php?pid=0004-282X&script=sci_serial		0004-282X	1678-4227	Academia Brasileira de Neurologia (ABNEURO)	Academia Brasileira de Neurologia (ABN)	SciELO Brazil	Brazil	No	http://www.scielo.br/revistas/anp/iinstruc.htm#003				http://www.scielo.br/revistas/anp/iinstruc.htm#003										http://www.scielo.br/revistas/anp/iaboutj.htm	Yes	DOI	Yes	http://www.scielo.br/statjournal.php?lang=en&issn=0004-282X	2000	PDF, HTML, XML	health sciences, patients with neurological diseases, training for neurologists	English	http://www.scielo.br/revistas/anp/iedboard.htm	Peer review	http://www.scielo.br/revistas/anp/iinstruc.htm	http://www.scielo.br/revistas/anp/iaboutj.htm	http://www.scielo.br/revistas/anp/iinstruc.htm		http://www.scielo.br/revistas/anp/iinstruc.htm	7	http://www.scielo.br/revistas/anp/isubscrp.htm	Yes	http://www.scielo.br/scielo.php?script=sci_arttext&pid=S0004-282X2015000800648&lng=en&nrm=iso&tlng=en	CC BY-NC		http://www.scielo.br/revistas/anp/iaboutj.htm	Yes		False
Ars Pharmaceutica	http://revistaseug.ugr.es/index.php/ars		0004-2927	2340-9894	Facultad de Farmacia, Universidad de Granada	Universidad de Granada	OJS	Spain	No	http://revistaseug.ugr.es/index.php/ars/index				http://revistaseug.ugr.es/index.php/ars/index											Yes	DOI	Yes	http://scielo.isciii.es/statjournal.php?lang=es&issn=2340-9894	2002	PDF	Pharmaceutical Technology, Chemical Pharmaceutical, Pharmacology, Pharmacy Practice, Pharmaceutical Care, Radiopharmacy	English, Spanish; Castilian	http://revistaseug.ugr.es/index.php/ars/about/editorialTeam	Peer review	http://revistaseug.ugr.es/index.php/ars/about/editorialPolicies#peerReviewProcess	http://revistaseug.ugr.es/index.php/ars/about/editorialPolicies#focusAndScope	http://revistaseug.ugr.es/index.php/ars/about/submissions#onlineSubmissions			10	http://revistaseug.ugr.es/index.php/ars/about/editorialPolicies#openAccessPolicy	Yes	http://revistaseug.ugr.es/index.php/ars/article/download/7275/6329	CC BY-NC-SA		http://revistaseug.ugr.es/index.php/ars/index	Yes	Sherpa/Romeo, Dulcinea	False
Automatika	https://www.tandfonline.com/taut	Journal for Control, Measurement, Electronics, Computing and Communications	0005-1144	1848-3380	Taylor & Francis Group	KoREMA - Croatian Society for Communications, Computing, Electronics, Measurement and Control	Taylor & Francis Online	United Kingdom	Yes	https://tandfonline.com/action/authorSubmission?journalCode=taut20&page=instructions	300	GBP - Pound Sterling		https://tandfonline.com/action/authorSubmission?journalCode=taut20&page=instructions					Yes	https://authorservices.taylorandfrancis.com/apc-discounts-and-waivers/	CLOCKSS, LOCKSS			https://librarianresources.taylorandfrancis.com/product-info/journals/title-by-title/	Yes	DOI	Yes	https://tandfonline.com/toc/taut20/59/1?nav=tocList	2001	PDF, HTML	electronics, computing, robotics, automation, control systems, communications	English	https://www.tandfonline.com/action/journalInformation?show=editorialBoard&journalCode=taut	Blind peer review	https://www.tandfonline.com/action/authorSubmission?journalCode=taut&page=instructions	https://www.tandfonline.com/action/journalInformation?show=aimsScope&journalCode=taut	https://www.tandfonline.com/action/authorSubmission?journalCode=taut20&page=instructions	Yes	https://www.tandfonline.com/action/authorSubmission?journalCode=taut20&page=instructions	42	https://www.tandfonline.com/action/journalInformation?show=aimsScope&journalCode=TAUT20	Yes	https://www.tandfonline.com/action/showCopyRight?scroll=top&doi=10.1080%2F00051144.2018.1435341	CC BY-NC		http://authorservices.taylorandfrancis.com/publishing-agreements-your-options/	Yes		False
Bibliotecas: Anales de Investigación	http://revistas.bnjm.cu/index.php/anales		0006-176X	1683-8947	Biblioteca Nacional de Cuba		OJS	Cuba	No	http://revistas.bnjm.cu/index.php/anales/about/submissions#onlineSubmissions				http://revistas.bnjm.cu/index.php/anales/about/submissions#onlineSubmissions										http://revistas.bnjm.cu/index.php/anales/about/editorialPolicies#archiving					2000	PDF	archival sciences, information science, librarianship, library and information science	English, Portuguese, Spanish; Castilian	http://revistas.bnjm.cu/index.php/anales/about/editorialTeam	Double blind peer review	http://revistas.bnjm.cu/index.php/anales/about/editorialPolicies#peerReviewProcess	http://revistas.bnjm.cu/index.php/anales/about/editorialPolicies#focusAndScope	http://revistas.bnjm.cu/index.php/anales/about/submissions#authorGuidelines			24	http://revistas.bnjm.cu/index.php/anales/about/editorialPolicies#openAccessPolicy			CC BY-NC-SA		http://revistas.bnjm.cu/index.php/anales/about/submissions#copyrightNotice	Yes		True
Bijdragen tot de Taal-, Land- en Volkenkunde	http://booksandjournals.brillonline.com/content/journals/22134379	Journal of the Humanities and Social Sciences of Southeast Asia and Oceania	0006-2294	2213-4379	BRILL	Vereniging KITLV (NL)		Netherlands	No	http://www.brill.com/publications/journals/bijdragen-tot-de-taal-land-en-volkenkunde-journal-humanities-and-social-scienc				http://www.brill.com/publications/journals/bijdragen-tot-de-taal-land-en-volkenkunde-journal-humanities-and-social-scienc							Portico			http://www.brill.com/about/policies/archival-policy	Yes	DOI			2013	PDF, HTML	linguistics, ethnology, history of Indonesia, history of Southeast Asia, languages and literature of Eastern Asia	Dutch; Flemish, English	http://www.brill.com/publications/journals/bijdragen-tot-de-taal-land-en-volkenkunde-journal-humanities-and-social-scienc#EDIBOA_1	Double blind peer review	http://www.brill.com/sites/default/files/ftp/authors_instructions/BKI.pdf	http://www.brill.com/publications/journals/bijdragen-tot-de-taal-land-en-volkenkunde-journal-humanities-and-social-scienc	http://www.brill.com/sites/default/files/ftp/authors_instructions/BKI.pdf			20	http://www.brill.com/publications/journals/bijdragen-tot-de-taal-land-en-volkenkunde-journal-humanities-and-social-scienc	Yes	http://booksandjournals.brillonline.com/content/journals/10.1163/22134379-17104001	CC BY-NC		http://www.brill.com/publications/journals/bijdragen-tot-de-taal-land-en-volkenkunde-journal-humanities-and-social-scienc	Yes	Sherpa/Romeo	False
Boletín Cultural y Bibliográfico	http://publicaciones.banrepcultural.org/index.php/boletin_cultural		0006-6184		Banco de la República	Banco de la República	OJS	Colombia	No	http://publicaciones.banrepcultural.org/index.php/boletin_cultural/about/editorialPolicies#openAccessPolicy				http://publicaciones.banrepcultural.org/index.php/boletin_cultural/about/editorialPolicies#openAccessPolicy											Yes				1958	PDF	culture, Colombian heritage, bibliography, archeology, cartography, special libraries	Spanish; Castilian	http://www.banrepcultural.org/boletin-cultural/acerca	Editorial review	http://publicaciones.banrepcultural.org/index.php/boletin_cultural/about/history	http://publicaciones.banrepcultural.org/index.php/boletin_cultural/about/history	http://www.banrepcultural.org/boletin-cultural/acerca			24	http://publicaciones.banrepcultural.org/index.php/boletin_cultural/about/editorialPolicies#openAccessPolicy			CC BY-NC-SA		http://www.banrepcultural.org/boletin-cultural/content/derechos-de-autor-y-c%C3%B3mo-citar-esta-p%C3%A1gina	Yes		False
Bothalia: African Biodiversity & Conservation	http://www.abcjournal.org		0006-8241	2311-9284	AOSIS	South African National Biodiversity Institute	OJS	South Africa	No	http://www.abcjournal.org/index.php/abc/pages/view/faq_author#3				http://www.abcjournal.org/index.php/abc/pages/view/faq_author#3							LOCKSS			http://www.abcjournal.org/index.php/abc/gateway/lockss	Yes	DOI	Yes	http://www.abcjournal.org/index.php/ABC/issue/view/6	2014	PDF, HTML, ePUB, XML	species, ecosystems, diversity, plants, biodiversity	English	http://www.abcjournal.org/index.php/abc/pages/view/editorial-team	Double blind peer review	http://www.abcjournal.org/index.php/abc/pages/view/reviewer#3	http://www.abcjournal.org/index.php/abc/pages/view/about#1	http://www.abcjournal.org/index.php/abc/pages/view/authors#2	Yes	http://www.abcjournal.org/index.php/abc/pages/view/newsubmission#4	12	http://www.abcjournal.org/index.php/abc/pages/view/about#2	Yes	http://www.abcjournal.org/index.php/ABC/article/view/90	CC BY		http://www.abcjournal.org/index.php/abc/pages/view/authors#3	Yes	Sherpa/Romeo	True
Bragantia	http://www.scielo.br/scielo.php?pid=0006-8705&script=sci_serial	Revista de Ciências Agronômicas	0006-8705	1678-4499	Instituto Agronômico de Campinas		SciELO Brazil	Brazil	Yes	http://www.scielo.br/revistas/brag/iinstruc.htm#004	50	USD - US Dollar		http://www.scielo.br/revistas/brag/iinstruc.htm										http://www.scielo.br/revistas/brag/iaboutj.htm	Yes	DOI	Yes	http://www.scielo.br/statjournal.php?lang=en&issn=0006-8705	1998	PDF, HTML, XML	agricultural sciences, seed and fiber technology	English, Portuguese	http://www.scielo.br/revistas/brag/iedboard.htm	Peer review	http://www.scielo.br/revistas/brag/iinstruc.htm	http://www.scielo.br/revistas/brag/iaboutj.htm	http://www.scielo.br/revistas/brag/iinstruc.htm			4	http://www.scielo.br/revistas/brag/isubscrp.htm	Yes	http://www.scielo.br/scielo.php?script=sci_arttext&pid=S0006-87052015000200149&lng=en&nrm=iso&tlng=en	CC BY-NC		http://www.scielo.br/revistas/brag/iaboutj.htm	Yes		False
Brodogradnja	http://www.fsb.hr/brodogradnja	Shipbuilding	0007-215X	1845-5859	Faculty of Mechanical Engineering and Naval Architecture	University of Zagreb	Hrcak	Croatia	No	http://www.fsb.unizg.hr/brodogradnja/PaperSubmission.htm				http://www.fsb.unizg.hr/brodogradnja/PaperSubmission.htm									Hrcak - Portal of scientific journals of Croatia	http://hrcak.srce.hr				http://hrcak.srce.hr	2005	PDF	shipping, offshore, naval architecture, shipbuilding	Croatian, English	http://www.fsb.unizg.hr/brodogradnja/EditorialBoard.htm	Double blind peer review	https://www.fsb.unizg.hr/brodogradnja/ReviewingProcess.htm	http://www.fsb.unizg.hr/brodogradnja/AboutBRODOGRADNJA.htm	http://www.fsb.unizg.hr/brodogradnja/PaperSubmission.htm			8	http://www.fer.unizg.hr/oa2012/declaration?_v1=Hod5Xwf8sA37HY2iTehXB_vQU4m9tccIbrJXEBLiky6UMIuZiDrOroDQ-hXL2WqZzRmh4Fn8FrVCpNiPtnCSoUkkQjqRDbfFJkKcazwFrAYC29gZ&_lid=75254			CC BY		https://www.fsb.unizg.hr/brodogradnja/	Yes	Sherpa/Romeo	True
California Agriculture	http://calag.ucanr.edu/		0008-0845	2160-8091	University of California Agriculture and Natural Resources	University of California Agriculture and Natural Resources	University of California Agriculture and Natural Resources	United States	No	http://calag.ucanr.edu/SubmitArticles/				http://calag.ucanr.edu/SubmitArticles/											Yes	DOI			1946	PDF, HTML	Agriculture, Environment, Nutrition, Forestry	English	http://calag.ucanr.edu/Associate_editors/	Double blind peer review	http://calag.ucanr.edu/About/	http://calag.ucanr.edu/About/	http://calag.ucanr.edu/SubmitArticles/			20	http://calag.ucanr.edu/About/			CC BY-NC-ND		http://calag.ucanr.edu/About/	Yes		False
Casopis pro Moderní Filologii	http://casopispromodernifilologii.ff.cuni.cz/en/	Journal for Modern Philology	0008-7386	2336-6591	Univerzita Karlova, Filozofická fakulta			Czech Republic	No	http://casopispromodernifilologii.ff.cuni.cz/en/about-journal-4/				http://casopispromodernifilologii.ff.cuni.cz/en/about-journal-4/											Yes				2015	PDF	philology, linguistics	Czech, English	http://casopispromodernifilologii.ff.cuni.cz/en/editorial-board/	Double blind peer review	http://casopispromodernifilologii.ff.cuni.cz/en/review-process/	http://casopispromodernifilologii.ff.cuni.cz/en/about-journal-4/	http://casopispromodernifilologii.ff.cuni.cz/en/guidelines/			22	http://casopispromodernifilologii.ff.cuni.cz/en/about-journal-4/			CC BY-NC-ND		http://casopispromodernifilologii.ff.cuni.cz/en/about-journal-4/	Yes		False
Catalogue and Index	http://www.cilip.org.uk/cataloguing-indexing-group/catalogue-index	Catalogue & Index	0008-7629	2399-9667	Chartered Institute of Library and Information Professionals (CILIP)	Cataloguing and Indexing Group (CIG)		United Kingdom	No	http://www.cilip.org.uk/cataloguing-indexing-group/catalogue-index/guidance-contributors				http://www.cilip.org.uk/cataloguing-indexing-group/catalogue-index/guidance-contributors															2016	PDF	Cataloguing, Metadata, Classification, Indexing, knowledge organisation	English	http://www.cilip.org.uk/cataloguing-indexing-group/catalogue-index	Editorial review	http://www.cilip.org.uk/cataloguing-indexing-group/catalogue-index/guidance-contributors	http://www.cilip.org.uk/cataloguing-indexing-group/catalogue-index	http://www.cilip.org.uk/cataloguing-indexing-group/catalogue-index/guidance-contributors			4	http://www.cilip.org.uk/cataloguing-indexing-group/catalogue-index/open-access-statement			CC BY		http://www.cilip.org.uk/cataloguing-indexing-group/catalogue-index/open-access-statement	Yes		True
Anales de la Cátedra Francisco Suárez	http://revistaseug.ugr.es/index.php/acfs	ACFS	0008-7750	2530-3716	Universidad de Granada	Departamento de Filosofía del Derecho – Facultad de Derecho	OJS	Spain	No	http://revistaseug.ugr.es/index.php/acfs/about/editorialPolicies#openAccessPolicy				http://revistaseug.ugr.es/index.php/acfs/about/editorialPolicies#openAccessPolicy											Yes				2003	PDF	Philosophy of Law, Law, Philosophy, Political Philosophy	Spanish; Castilian	http://revistaseug.ugr.es/index.php/acfs/about/editorialTeam	Blind peer review	http://revistaseug.ugr.es/index.php/acfs/about/editorialPolicies#peerReviewProcess	http://revistaseug.ugr.es/index.php/acfs/index	http://revistaseug.ugr.es/index.php/acfs/about/submissions#authorGuidelines			16	http://revistaseug.ugr.es/index.php/acfs/about/editorialPolicies#openAccessPolicy			CC BY-NC-ND		http://revistaseug.ugr.es/index.php/acfs/about/editorialPolicies#openAccessPolicy	Yes	Dulcinea	True
Ciceroniana	http://www.ojs.unito.it/index.php/COL/index		0009-6687	2532-5299	Università degli Studi di Torino	Société Internationale des Amis de Cicéron	OJS	Italy	No	http://www.ojs.unito.it/index.php/COL/about/editorialPolicies#custom-2				http://www.ojs.unito.it/index.php/COL/about/editorialPolicies#custom-2							LOCKSS			http://www.ojs.unito.it/index.php/COL/about/editorialPolicies#archiving	Yes	DOI	Yes	http://www.ojs.unito.it/index.php/COL/about/editorialPolicies#custom-0	1959	PDF	classics, Latin, Marcus Tullius Cicero, Roman thought, ancient philosophy, classical philology	English, French, German, Italian, Spanish; Castilian	http://www.ojs.unito.it/index.php/COL/about/editorialTeam	Double blind peer review	http://www.ojs.unito.it/index.php/COL/about/editorialPolicies#peerReviewProcess	http://www.ojs.unito.it/index.php/COL/about/editorialPolicies#focusAndScope	http://www.ojs.unito.it/index.php/COL/about/submissions#authorGuidelines			20	http://www.ojs.unito.it/index.php/COL/about/editorialPolicies#openAccessPolicy			CC BY-SA		http://www.ojs.unito.it/index.php/COL/article/view/2194/1933	Yes	Sherpa/Romeo	True
Ciencias Administrativas	https://revistas.unlp.edu.ar/CADM		0009-6784	2314-3738	Uiversidad Nacional de La Plata	Universidad Nacional de La Plata, Facultad de Ciencias Económicas	OJS	Argentina	No	https://revistas.unlp.edu.ar/CADM/about				https://revistas.unlp.edu.ar/CADM/about										http://revistas.unlp.edu.ar/CADM/about/submissions#onlineSubmissions	Yes				2013	PDF	administration, economics	Spanish; Castilian	https://revistas.unlp.edu.ar/CADM/about/editorialTeam	Blind peer review	https://revistas.unlp.edu.ar/CADM/about	https://revistas.unlp.edu.ar/CADM/about	https://revistas.unlp.edu.ar/CADM/about/submissions#authorGuidelines			6	https://revistas.unlp.edu.ar/CADM/about/editorialPolicies#openAccessPolicy			CC BY-NC-ND		https://revistas.unlp.edu.ar/CADM/index	Yes		True
Collectanea Botanica	http://collectaneabotanica.revistas.csic.es		0010-0730	1989-1067	Consejo Superior de Investigaciones Científicas		OJS	Spain	No	http://collectaneabotanica.revistas.csic.es/index.php/collectaneabotanica/about/editorialPolicies				http://collectaneabotanica.revistas.csic.es/index.php/collectaneabotanica/about/editorialPolicies												DOI			1988	PDF, HTML, XML	biogeography, ecology, biology, morphology, nomenclature, plant-animal relations	Catalan; Valencian, English, French, Portuguese, Spanish; Castilian	http://collectaneabotanica.revistas.csic.es/index.php/collectaneabotanica/about/editorialTeam	Blind peer review	http://collectaneabotanica.revistas.csic.es/index.php/collectaneabotanica/about/editorialPolicies#peerReviewProcess	http://collectaneabotanica.revistas.csic.es/index.php/collectaneabotanica/about/editorialPolicies#focusAndScope	http://collectaneabotanica.revistas.csic.es/index.php/collectaneabotanica/about/submissions#authorGuidelines			48	http://collectaneabotanica.revistas.csic.es/index.php/collectaneabotanica/about/editorialPolicies#openAccessPolicy			CC BY-NC		http://collectaneabotanica.revistas.csic.es/index.php/collectaneabotanica/index	Yes		False
College and Research Libraries	http://crl.acrl.org/		0010-0870	2150-6701	Association of College and Research Libraries		HighWire	United States	No	http://crl.acrl.org/site/misc/author.xhtml				http://crl.acrl.org/site/misc/author.xhtml												DOI	Yes	http://crl.acrl.org/articleusage?gca=crl;76/7/859 (sample article, these are public)	1939	PDF	library science, information literacy, higher education	English	http://crl.acrl.org/site/misc/about.xhtml	Double blind peer review	http://crl.acrl.org/site/misc/author.xhtml	http://crl.acrl.org/site/misc/author.xhtml	http://crl.acrl.org/site/misc/author.xhtml			45	http://crl.acrl.org/site/misc/about.xhtml	Yes	http://crl.acrl.org/content/77/6/682.abstract	CC BY-NC		http://crl.acrl.org/site/misc/about.xhtml	Yes		True
Crítica. Revista Hispanoamericana de Filosofía	http://critica.filosoficas.unam.mx		0011-1503	1870-4905	Instituto de Investigaciones Filosóficas, UNAM	Universidad Nacional Autónoma de México	critica.filosoficas.unam.mx	Mexico	No	http://critica.filosoficas.unam.mx/pg/es/descripcionrevista.php				http://critica.filosoficas.unam.mx/pg/es/descripcionrevista.php															1967	PDF	philosophy, analytics, logic	English, Spanish; Castilian	http://critica.filosoficas.unam.mx/pg/en/comiteeditorial.php	Double blind peer review	http://critica.filosoficas.unam.mx/pg/en/informacionautores.php	http://critica.filosoficas.unam.mx/pg/en/descripcionrevista.php	http://critica.filosoficas.unam.mx/pg/en/informacionautores.php			24	http://critica.filosoficas.unam.mx/pg/en/descripcionrevista.php			Publisher's own license	Attribution, No Commercial Usage	http://critica.filosoficas.unam.mx/pg/en/derechosyautorizaciones.php	Yes		False
Croatica Chemica Acta	http://cca.hkd.hr/		0011-1643	1334-417X	Croatian Chemical Society		Hrcak	Croatia	No	http://cca.hkd.hr/?page_id=201				http://cca.hkd.hr/?page_id=201									Common HRCAK platform for Croatian Open Access journals, managed by the University Computing Centre SRCE.	http://cca.hkd.hr/	Yes	DOI	Yes	http://hrcak.srce.hr/index.php?show=posjecenost-casopisa&lang=en	1990	PDF	chemistry, biology	English	http://cca.hkd.hr/?page_id=30	Blind peer review	http://cca.hkd.hr/?page_id=201	http://cca.hkd.hr/	http://cca.hkd.hr/?page_id=201	Yes	http://cca.hkd.hr/?page_id=201	20	http://cca.hkd.hr/?page_id=527	Yes	http://hrcak.srce.hr/index.php?show=clanak&id_clanak_jezik=222315&lang=en	CC BY		http://cca.hkd.hr/?page_id=527	Yes	Sherpa/Romeo	True
Current Therapeutic Research	http://www.journals.elsevier.com/current-therapeutic-research/		0011-393X	1879-0313	Elsevier			Netherlands	Yes	http://www.elsevier.com/journals/current-therapeutic-research/0011-393X/guide-for-authors	1200	USD - US Dollar		http://www.elsevier.com/journals/current-therapeutic-research/0011-393X/guide-for-authors							Portico	Koninklijke Bibliotheek		http://www.elsevier.com/editors/policies/independent-digital-archives		DOI			2006	PDF, HTML, ePUB	drug therapy, applied health economics	English	http://www.journals.elsevier.com/current-therapeutic-research/editorial-board/	Double blind peer review	http://www.elsevier.com/journals/current-therapeutic-research/0011-393X/guide-for-authors	http://www.journals.elsevier.com/current-therapeutic-research/	http://www.elsevier.com/journals/current-therapeutic-research/0011-393X/guide-for-authors	Yes	http://www.elsevier.com/editors/perk/plagiarism-detection	12	http://www.elsevier.com/journals/current-therapeutic-research/0011-393x/open-access-journal	Yes	http://www.sciencedirect.com/science/article/pii/S0011393X13000362	CC BY-NC-ND		http://www.elsevier.com/journals/current-therapeutic-research/0011-393x/open-access-journal	Yes	Sherpa/Romeo	True
Dados: Revista de Ciências Sociais	http://www.scielo.br/scielo.php?script=sci_serial&pid=0011-5258&lng=es&nrm=iso		0011-5258	1678-4588	Universidade do Estado do Rio de Janeiro		SciELO Brazil	Brazil	No	http://www.scielo.br/revistas/dados/iinstruc.htm#01				http://www.scielo.br/revistas/dados/iinstruc.htm#01											Yes	DOI			1996	PDF, HTML, XML	social sciences	English, French, Portuguese, Spanish; Castilian	http://www.scielo.br/revistas/dados/iedboard.htm	Peer review	http://www.scielo.br/revistas/dados/iinstruc.htm#01	http://www.scielo.br/revistas/dados/iinstruc.htm	http://www.scielo.br/revistas/dados/iinstruc.htm			10	http://www.scielo.br/revistas/dados/isubscrp.htm	Yes	http://www.scielo.br/scielo.php?script=sci_arttext&pid=S0011-52582015000200371&lng=en&nrm=iso&tlng=pt	CC BY-NC		http://www.scielo.br/revistas/dados/iaboutj.htm	Yes		False
Darwiniana	http://redalyc.org:9081/revista.oa?id=669		0011-6793	1850-1702	Instituto de Botánica Darwinion y el Museo Botánico de Córdoba	Instituto de Botánica Darwinion y el Museo Botánico de Córdoba	Redalyc	Argentina	No	http://www.ojs.darwin.edu.ar/index.php/darwiniana/index				http://www.ojs.darwin.edu.ar/index.php/darwiniana/index										http://www.ojs.darwin.edu.ar/index.php/darwiniana/about/editorialPolicies#openAccessPolicy	Yes	DOI			2012	PDF, HTML	botany, ecology, genetics, phytogeography	English, Spanish; Castilian	http://www.ojs.darwin.edu.ar/index.php/darwiniana/about/editorialTeam	Double blind peer review	http://www.ojs.darwin.edu.ar/index.php/darwiniana/about/editorialPolicies#peerReviewProcess	http://www.ojs.darwin.edu.ar/index.php/darwiniana/about/editorialPolicies#focusAndScope	http://www.ojs.darwin.edu.ar/index.php/darwiniana/about/submissions#authorGuidelines			26	http://www.ojs.darwin.edu.ar/index.php/darwiniana/about/editorialPolicies#openAccessPolicy			CC BY-NC		http://www.ojs.darwin.edu.ar/index.php/darwiniana/about/submissions#copyrightNotice	Yes		False
Deutsches Ärzteblatt	http://www.aerzteblatt.de/archiv/daetitel		0012-1207	2199-7292	Deutscher Ärzte-Verlag	German Medical Association and the National Association of Statutory Health Insurance Physicians	Deutscher Ärzte-Verlag	Germany	No	http://www.aerzteblatt.de/down.asp?id=9205				http://www.aerzteblatt.de/down.asp?id=9205							PMC/Europe PMC/PMC Canada	DIMDI		http://www.aerzteblatt.de/down.asp?id=9205	Yes	DOI	Yes	http://www.aerzteblatt.de/int/archive/article/171810/Detecting-Prostate-Cancer	1997	PDF, HTML, XML	health services research, clinical medicine	English, German	http://www.aerzteblatt.de/int/editorial-team	Peer review	http://www.aerzteblatt.de/down.asp?id=9205	http://www.aerzteblatt.de/down.asp?id=9205	http://www.aerzteblatt.de/down.asp?id=9205			40	http://www.aerzteblatt.de/down.asp?id=9205			Publisher's own license					False
Dyna	http://dyna.medellin.unal.edu.co/es/index.php		0012-7353	2346-2183	Universidad Nacional de Colombia	Universidad Nacional de Colombia, Facultad de Minas		Colombia	No	http://dyna.medellin.unal.edu.co/es/instruccionesAutores.php				http://dyna.medellin.unal.edu.co/es/instruccionesAutores.php										http:// http://dyna.medellin.unal.edu.co/en/index.php	Yes	DOI			2002	PDF, HTML	mining engineering, mineral industries, material engineering, civil engineering, electrical engineering	English, Spanish; Castilian	http://dyna.medellin.unal.edu.co/en/comiteEditorial.php	Double blind peer review	http://dyna.medellin.unal.edu.co/es/procesoArbitraje.php	http://dyna.medellin.unal.edu.co/es/planeacionEstrategica.php	http://dyna.medellin.unal.edu.co/es/instruccionesAutores.php	Yes	http://dyna.medellin.unal.edu.co/es/ediciones/185/editorial/Editorial185.pdf	24	http://dyna.medellin.unal.edu.co/en/index.php			CC BY-NC-ND		http://dyna.medellin.unal.edu.co/es/index.php	Yes	Sherpa/Romeo	False
Edda	https://www.idunn.no/edda	Nordisk Tidsskrift for Litteraturforskning	0013-0818	1500-1989	Scandinavian University Press/Universitetsforlaget	Scandinavian University Press/Universitetsforlaget and the Editors	Idunn	Norway	No	https://www.idunn.no/edda				https://www.idunn.no/edda											Yes	DOI			2017	PDF, HTML, XML	literature, Nordic literature, literary theory	Bokmål, Norwegian; Norwegian Bokmål, Danish, English, Norwegian Nynorsk; Nynorsk, Norwegian, Swedish	https://www.idunn.no/edda#editors	Double blind peer review	https://www.idunn.no/edda#about	https://www.idunn.no/edda#about	https://www.idunn.no/edda#authors			52	https://www.idunn.no/edda#rights	Yes	https://www.idunn.no/edda/2017/02/introduction	CC BY-NC		https://www.idunn.no/edda#rights	Yes	Sherpa/Romeo	True
Ekonomski Anali	http://www.ekof.bg.ac.rs/publikacije/casopisi/ekonomski-anali/	Economic Annals	0013-3264	1820-7375	Faculty of Economics, Belgrade			Serbia	No	http://www.ekof.bg.ac.rs/publikacije/casopisi/ekonomski-anali/policy/				http://www.ekof.bg.ac.rs/publikacije/casopisi/ekonomski-anali/policy/								National Library of Serbia		http://repozitorijum.nb.rs/repozitorijum.aspx?issn=0013-3264	Yes	DOI			2002	PDF	economics	English	http://www.ekof.bg.ac.rs/publikacije/casopisi/ekonomski-anali/editorial-board/	Double blind peer review	http://www.ekof.bg.ac.rs/publikacije/casopisi/ekonomski-anali/policy/	http://www.ekof.bg.ac.rs/publikacije/casopisi/ekonomski-anali	http://www.ekof.bg.ac.rs/publikacije/casopisi/ekonomski-anali/instructions			18	http://www.ekof.bg.ac.rs/publikacije/casopisi/ekonomski-anali/policy/			CC BY-NC-ND		http://www.ekof.bg.ac.rs/publikacije/casopisi/ekonomski-anali/policy/	Yes		False
Emerita	http://emerita.revistas.csic.es/index.php/emerita		0013-6662	1988-8384	Consejo Superior de Investigaciones Científicas	Consejo Superior de Investigaciones Científicas	OJS	Spain	No	http://revistas.csic.es/mas_en.html				http://revistas.csic.es/mas_en.html											Yes	DOI			1974	PDF	classical philology, linguistics, ancient history	Spanish; Castilian	http://emerita.revistas.csic.es/index.php/emerita/about/editorialTeam	Double blind peer review	http://emerita.revistas.csic.es/index.php/emerita/about/submissions#authorGuidelines	http://emerita.revistas.csic.es/index.php/emerita/about/editorialPolicies	http://emerita.revistas.csic.es/index.php/emerita/about/submissions#authorGuidelines	Yes	http://emerita.revistas.csic.es/index.php/emerita/about/editorialPolicies	48	http://emerita.revistas.csic.es/index.php/emerita/about/editorialPolicies#openAccessPolicy	Yes	http://emerita.revistas.csic.es/index.php/emerita/article/view/1114	CC BY		http://emerita.revistas.csic.es/index.php/emerita/about/submissions#copyrightNotice	Yes		False
Greek Review of Social Research	http://ejournals.epublishing.ekt.gr/index.php/ekke	?p??e???s? ?????????? ??e????	0013-9696	2241-8512	EKKE			Greece	No	http://ejournals.epublishing.ekt.gr/index.php/ekke				http://ejournals.epublishing.ekt.gr/index.php/ekke												DOI	Yes	http://ejournals.epublishing.ekt.gr/index.php/ekke/article/view/8679	1969	PDF	Social Science	Greek, Modern (1453-)	http://ejournals.epublishing.ekt.gr/index.php/ekke/about	Double blind peer review	http://ejournals.epublishing.ekt.gr/index.php/ekke/about/editorialPolicies#peerReviewProcess	http://ejournals.epublishing.ekt.gr/index.php/ekke/about/editorialPolicies#focusAndScope	http://ejournals.epublishing.ekt.gr/index.php/ekke/about/submissions#authorGuidelines			16	http://ejournals.epublishing.ekt.gr/index.php/ekke/about/editorialPolicies#openAccessPolicy	Yes	http://ejournals.epublishing.ekt.gr/index.php/ekke/rt/metadata/8617/0	CC BY-NC-SA		http://ejournals.epublishing.ekt.gr/index.php/ekke/about/submissions#copyrightNotice	Yes	Sherpa/Romeo	True
Építoanyag: Journal of Silicate Based and Composite Materials	http://en.epitoanyag.org.hu/	Építoanyag: JSBCM	0013-970X	2064-4477	Scientific Society of the Silicate Industry (SZTE)	Scientific Society of the Silicate Industry (SZTE)	EBSCO	Hungary	No	http://en.epitoanyag.org.hu/open-access				http://en.epitoanyag.org.hu/open-access								OSZK		http://ki.oszk.hu/calimera/3kotet/3kotetdigitalismegorzes.html		DOI			2013	PDF	ceramics, composites, construction materials	English, Hungarian	http://en.epitoanyag.org.hu/about-journal/editorial-board	Blind peer review	http://en.epitoanyag.org.hu/for-autors/submit-your-paper	http://en.epitoanyag.org.hu/about-journal/aims-and-scope	http://en.epitoanyag.org.hu/for-autors/instruction-for-authors			12	http://en.epitoanyag.org.hu/open-access		http://en.epitoanyag.org.hu/issues/downloadable-issues	CC BY-NC		http://en.epitoanyag.org.hu/for-autors/instruction-for-authors	Yes	Sherpa/Romeo	False
DIE ERDE: Journal of the Geographical Society of Berlin	http://www.die-erde.org		0013-9998		Gesellschaft für Erdkunde zu Berlin	Gesellschaft für Erdkunde zu Berlin	OJS	Germany	Yes		25	EUR - Euro										www.digizeitschriften.de		http://www.die-erde.org/index.php/die-erde/issue/archive	Yes	DOI			2013	PDF	geography, geosciences, earth system, spatial analysis	English	http://www.die-erde.org/index.php/die-erde/about/editorialTeam	Peer review	http://www.die-erde.org/index.php/die-erde/about/editorialPolicies#peerReviewProcess	http://www.die-erde.org/index.php/die-erde/about/editorialPolicies#focusAndScope	http://www.die-erde.org/index.php/die-erde/about/submissions#authorGuidelines	Yes	http://www.die-erde.org/index.php/die-erde/about/editorialPolicies#peerReviewProcess	30	http://www.die-erde.org/index.php/die-erde/about/editorialPolicies#openAccessPolicy			CC BY		http://www.die-erde.org/index.php/die-erde/index	Yes		True
Estudios Geográficos	http://estudiosgeograficos.revistas.csic.es/index.php/estudiosgeograficos		0014-1496	1988-8546	Consejo Superior de Investigaciones Científicas		OJS	Spain	No	http://estudiosgeograficos.revistas.csic.es/index.php/estudiosgeograficos/about/editorialPolicies				http://estudiosgeograficos.revistas.csic.es/index.php/estudiosgeograficos/about/editorialPolicies												DOI			2001	PDF	demography, sociology, ecology, cartography, GIS, remote sensing	English, Spanish; Castilian	http://estudiosgeograficos.revistas.csic.es/index.php/estudiosgeograficos/about/editorialTeam	Double blind peer review	http://estudiosgeograficos.revistas.csic.es/index.php/estudiosgeograficos/about/editorialPolicies#peerReviewProcess	http://estudiosgeograficos.revistas.csic.es/index.php/estudiosgeograficos/about/editorialPolicies#focusAndScope	http://estudiosgeograficos.revistas.csic.es/index.php/estudiosgeograficos/about/submissions#authorGuidelines			48	http://estudiosgeograficos.revistas.csic.es/index.php/estudiosgeograficos/about/editorialPolicies#openAccessPolicy			CC BY-NC		http://estudiosgeograficos.revistas.csic.es/index.php/estudiosgeograficos/index	Yes		False
Fennia: International Journal of Geography	http://ojs.tsv.fi/index.php/fennia		0015-0010	1798-5617	Geographical Society of Finland		OJS	Finland	No	http://ojs.tsv.fi/index.php/fennia/index				http://ojs.tsv.fi/index.php/fennia/index											Yes	DOI			2010	PDF	geography, physical geography, human geography	English	http://fennia.journal.fi/about/editorialTeam	Double blind peer review	http://fennia.journal.fi/about/submissions	http://fennia.journal.fi/about	http://ojs.tsv.fi/index.php/fennia/about/submissions#authorGuidelines	Yes	http://ojs.tsv.fi/index.php/fennia/about/submissions#authorGuidelines	16	http://fennia.journal.fi/about	Yes	http://ojs.tsv.fi/index.php/fennia/article/view/46331/15801	CC BY		http://ojs.tsv.fi/index.php/fennia/about/submissions#copyrightNotice	Yes		True
Florida Entomologist	http://journals.fcla.edu/flaent		0015-4040		Florida Entomological Society		Florida Entomological Society	United States	Yes	http://journals.fcla.edu/flaent/about/submissions#authorGuidelines	747	USD - US Dollar		http://journals.fcla.edu/flaent/about/submissions#authorGuidelines											Yes				1994	PDF, HTML	entomology	English	http://journals.fcla.edu/flaent/about/editorialTeam	Blind peer review	http://journals.fcla.edu/flaent/about/submissions#authorGuidelines	http://journals.fcla.edu/flaent/about	http://journals.fcla.edu/flaent/about/submissions#authorGuidelines			8	http://journals.fcla.edu/flaent/about			CC BY-NC		http://journals.fcla.edu/flaent/about/submissions#copyrightNotice	Yes		True
Fluoride	http://www.fluorideresearch.org/	Fluoride: Quarterly Journal of the International Society for Fluoride Research Inc.	0015-4725	2253-4083	International Society for Fluoride Research Inc.	International Society for Fluoride Research Inc.		New Zealand	No	http:// www.fluorideresearch.org				http://www.fluorideresearch.org											Yes				1968	PDF	fluoride toxicology, fluoride biochemistry, veterinary aspects of fluoride, clinical aspects of fluoride, agricultural aspects of fluoride, dental aspects of fluoride	Chinese, English, Japanese, Spanish; Castilian	http://www.fluorideresearch.org	Peer review	http://www.fluorideresearch.org	http://www.fluorideresearch.org	http://www.fluorideresearch.org/481/files/FJ2015_v48_n1_p090_sfs.pdf			33	http://www.fluorideresearch.org			Publisher's own license	Attribution	http://www.fluorideresearch.org	Yes		False
Genus	https://genus.springeropen.com/	Journal of Population Sciences	0016-6987	2035-5556	SpringerOpen	Università degli studi di Roma La Sapienza	SpringerOpen	United Kingdom	No	https://genus.springeropen.com/about				https://genus.springeropen.com/about							CLOCKSS, Portico	Koninklijke Bibliotheek; National Science Library, Chinese Academy of Sciences		https://www.springeropen.com/get-published/indexing-archiving-and-access-to-data/journal-archiving	Yes	DOI	Yes	https://www.springeropen.com/get-published/indexing-archiving-and-access-to-data/article-metrics	2016	PDF, HTML	population, demography, anthropology, population dynamics	English	https://genus.springeropen.com/about/editorial-board	Double blind peer review	https://genus.springeropen.com/about	https://genus.springeropen.com/about	https://genus.springeropen.com/submission-guidelines	Yes	https://genus.springeropen.com/submission-guidelines/editorial-policies	8	https://genus.springeropen.com/about	Yes	https://genus.springeropen.com/articles/10.1186/s41118-018-0042-x	CC BY		https://genus.springeropen.com/submission-guidelines/copyright	Yes	Sherpa/Romeo	True
Geographica Helvetica	http://www.geographica-helvetica.net/	GH	0016-7312	2194-8798	Copernicus Publications	Department of Geography, University of Zurich (UZH)	Copernicus Publications	Germany	No	http://www.geographica-helvetica.net/for_authors/article_processing_charges.html				http://www.geographica-helvetica.net/for_authors/article_processing_charges.html					Yes	http://publications.copernicus.org/for_authors/financial_support.html	CLOCKSS, Portico		http://retro.seals.ch	http://www.geographica-helvetica.net/index.html	Yes	DOI	Yes	http://www.geographica-helvetica.net/about/article_level_metrics.html	1946	PDF, XML	human geography, physical geography, cartography, GIS, remote sensing	English, French, German, Italian	http://www.geographica-helvetica.net/editorial_board.html	Double blind peer review	http://www.geographica-helvetica.net/peer_review/review_process.html	http://www.geographica-helvetica.net/about/aims_and_scope.html	http://www.geographica-helvetica.net/for_authors/manuscript_preparation.html	Yes	http://www.geographica-helvetica.net/for_authors/plagiarism_detection.html	53	http://www.geographica-helvetica.net/index.html	Yes	http://www.geogr-helv.net/70/109/2015/gh-70-109-2015.xml	CC BY		http://www.geographica-helvetica.net/about/licence_and_copyright.html	Yes	Sherpa/Romeo	True
Geologija	http://www.geologija-revija.si		0016-7789	1854-620X	Geological Survey of Slovenia		Geological Survey of Slovenia	Slovenia	No	http://www.geologija-revija.si/en/default.aspx?id=7				http://www.geologija-revija.si/en/default.aspx?id=7								dLib.si - The Digital Library of Slovenia		http://www.dlib.si/results/?query=%27rel%3dGeologija%27&pageSize=100&fformattypeserial=journal		DOI			1990	PDF	geochemistry, geohazards, geological mapping, stratigraphy, palaeontology, mineralogy	English, Slovenian	http://www.geologija-revija.si/en/default.aspx?id=3	Peer review	http://www.geologija-revija.si/en/default.aspx?id=7	http://www.geologija-revija.si/en/default.aspx?id=7	http://www.geologija-revija.si/en/default.aspx?id=4			10	http://www.geologija-revija.si/en/default.aspx?id=7	Yes	http://www.geologija-revija.si/default.aspx?id=7	CC BY		http://www.geologija-revija.si/en/default.aspx?id=7	Yes	Sherpa/Romeo	True
Ginekologia Polska	https://journals.viamedica.pl/ginekologia_polska		0017-0011		VM Media sp. z o.o. VM Group sp.k. Grupa Via Medica	The Polish Gynecological Society	OJS	Poland	Yes	https://journals.viamedica.pl/ginekologia_polska/about/submissions#authorFees	400	EUR - Euro		https://journals.viamedica.pl/ginekologia_polska/about/submissions#authorFees												DOI			2007	PDF	Gynecology, Obstetrics, Gynecology Oncology	English, Polish	https://journals.viamedica.pl/ginekologia_polska/about/editorialTeam	Double blind peer review	https://journals.viamedica.pl/ginekologia_polska/about/editorialPolicies#peerReviewProcess	https://journals.viamedica.pl/ginekologia_polska/about/editorialPolicies#focusAndScope	https://journals.viamedica.pl/ginekologia_polska/about/submissions#authorGuidelines			35	https://journals.viamedica.pl/ginekologia_polska/about/editorialPolicies#custom-1			CC BY-NC-ND		https://journals.viamedica.pl/ginekologia_polska/about/editorialPolicies#custom-1	Yes		False
Grasas y Aceites	http://grasasyaceites.revistas.csic.es/index.php/grasasyaceites		0017-3495	1988-4214	Consejo Superior de Investigaciones Científicas		OJS	Spain	No	http://grasasyaceites.revistas.csic.es/index.php/grasasyaceites/about/editorialPolicies				http://grasasyaceites.revistas.csic.es/index.php/grasasyaceites/about/editorialPolicies												DOI			1991	PDF, HTML, XML	edible fats, edible oils, oleaginous fruits and seeds, table olives, by-products	English, Spanish; Castilian	http://grasasyaceites.revistas.csic.es/index.php/grasasyaceites/about/editorialTeam	Double blind peer review	http://grasasyaceites.revistas.csic.es/index.php/grasasyaceites/about/editorialPolicies#peerReviewProcess	http://grasasyaceites.revistas.csic.es/index.php/grasasyaceites/about/editorialPolicies#focusAndScope	http://grasasyaceites.revistas.csic.es/index.php/grasasyaceites/about/submissions#authorGuidelines			48	http://grasasyaceites.revistas.csic.es/index.php/grasasyaceites/about/editorialPolicies#openAccessPolicy	Yes	http://grasasyaceites.revistas.csic.es/index.php/grasasyaceites/article/view/1494/1565	CC BY-NC		http://grasasyaceites.revistas.csic.es/index.php/grasasyaceites	Yes		False
Greek, Roman, and Byzantine Studies	http://grbs.library.duke.edu/index		0017-3916	2159-3159	Duke University		OJS	United States	No	http://grbs.library.duke.edu/about/editorialPolicies#focusAndScope				http://grbs.library.duke.edu/about/editorialPolicies#focusAndScope										http://grbs.library.duke.edu/about/submissions#copyrightNotice	Yes				2004	PDF	antiquity, Byzantium, history of Greece, Greek culture, Greek literature, Hellenic studies	English	http://grbs.library.duke.edu/index	Blind peer review	http://grbs.library.duke.edu/about/editorialPolicies#peerReviewProcess	http://grbs.library.duke.edu/about/editorialPolicies#focusAndScope	http://grbs.library.duke.edu/about/submissions#authorGuidelines			22	http://grbs.library.duke.edu/about/editorialPolicies#openAccessPolicy			CC BY		http://grbs.library.duke.edu/about/submissions#copyrightNotice	Yes		True
Heimen	https://www.idunn.no/heimen		0017-9841	1894-3195	Scandinavian University Press/Universitetsforlaget	Landslaget for lokalhistorie	Idunn	Norway	No	https://www.idunn.no/heimen				https://www.idunn.no/heimen											Yes	DOI			2017	PDF, HTML, XML	local history, regional history, history, local communities	Bokmål, Norwegian; Norwegian Bokmål, Norwegian Nynorsk; Nynorsk, Norwegian	https://www.idunn.no/heimen#editors	Double blind peer review	https://www.idunn.no/heimen#about	https://www.idunn.no/heimen#about	https://www.idunn.no/file/ci/66807456/325_Heimen_Forfatterinstruks.pdf			52	https://www.idunn.no/heimen#rights	Yes	https://www.idunn.no/heimen/2017/01/nye_bidrag_til_eiendomshistorien_ifinnmark	CC BY-NC		https://www.idunn.no/heimen#rights	Yes	Sherpa/Romeo	True
Hereditas	http://www.hereditasjournal.com/		0018-0661	1601-5223	BMC	The Mendelian Society of Lund	BMC	United Kingdom	Yes	http://hereditasjournal.biomedcentral.com/about	1370	GBP - Pound Sterling		http://hereditasjournal.biomedcentral.com/about					Yes	http://www.biomedcentral.com/getpublished/article-processing-charges	CLOCKSS, Portico	Koninklijke Bibliotheek		http://www.biomedcentral.com/getpublished/indexing-archiving-and-access-to-data/journal-archiving	Yes	DOI	Yes	http://www.hereditasjournal.com/content/152/1/3/about	2005	PDF, HTML	genetics, genomics	English	http://hereditasjournal.biomedcentral.com/about/editorial-board	Blind peer review	http://hereditasjournal.biomedcentral.com/about	http://hereditasjournal.biomedcentral.com/about	http://hereditasjournal.biomedcentral.com/submission-guidelines	Yes	http://www.biomedcentral.com/getpublished/editorial-policies#duplicate+publication	6	http://hereditasjournal.biomedcentral.com/about	Yes	http://www.hereditasjournal.com/content/152/1/3	CC BY		http://www.biomedcentral.com/about/policies/license-agreement	Yes	Sherpa/Romeo	True
Hispania	http://hispania.revistas.csic.es/index.php/hispania		0018-2141	1988-8368	Consejo Superior de Investigaciones Científicas	Consejo Superior de Investigaciones Científicas	OJS	Spain	No	http://hispania.revistas.csic.es/index.php/hispania/about/editorialPolicies#openAccessPolicy				http://hispania.revistas.csic.es/index.php/hispania/about/editorialPolicies#openAccessPolicy											Yes	DOI			2001	PDF	Medieval Societies, Modern Societies, Contemporary Societies	Spanish; Castilian	http://hispania.revistas.csic.es/index.php/hispania/about/editorialTeam	Double blind peer review	http://hispania.revistas.csic.es/index.php/hispania/about/submissions	http://hispania.revistas.csic.es/index.php/hispania/about/editorialPolicies#focusAndScope	http://hispania.revistas.csic.es/index.php/hispania/about/submissions#authorGuidelines			48	http://hispania.revistas.csic.es/index.php/hispania/about/editorialPolicies#openAccessPolicy			CC BY		http://hispania.revistas.csic.es/index.php/hispania/about/submissions#copyrightNotice	Yes		False
Hispania Sacra	http://hispaniasacra.revistas.csic.es/index.php/hispaniasacra/index		0018-215X	1988-4265	Consejo Superior de Investigaciones Científicas		OJS	Spain	No	http://hispaniasacra.revistas.csic.es/index.php/hispaniasacra/about/editorialPolicies				http://hispaniasacra.revistas.csic.es/index.php/hispaniasacra/about/editorialPolicies												DOI			2001	PDF	Hispanic civilization, historiography, history of religion, christianity, religious traditions, anthropology	Spanish; Castilian	http://hispaniasacra.revistas.csic.es/index.php/hispaniasacra/about/editorialTeam	Double blind peer review	http://hispaniasacra.revistas.csic.es/index.php/hispaniasacra/about/editorialPolicies#peerReviewProcess	http://hispaniasacra.revistas.csic.es/index.php/hispaniasacra/about/editorialPolicies#focusAndScope	http://hispaniasacra.revistas.csic.es/index.php/hispaniasacra/about/submissions#authorGuidelines			48	http://hispaniasacra.revistas.csic.es/index.php/hispaniasacra/about/editorialPolicies#openAccessPolicy			CC BY-NC		http://hispaniasacra.revistas.csic.es/index.php/hispaniasacra/index	Yes	OAI-PMH	False
Indian Heart Journal	https://www.journals.elsevier.com/indian-heart-journal/		0019-4832		Elsevier	Cardiological Society of India	www.sciencedirect.com	Netherlands	No	https://www.elsevier.com/journals/indian-heart-journal/0019-4832/guide-for-authors				https://www.elsevier.com/journals/indian-heart-journal/0019-4832/guide-for-authors					Yes	http://www.elsevier.com/about/corporate-responsibility/research-4-life/research-4-life-programs	CLOCKSS, Portico	Koninklijke Bibliotheek		https://www.elsevier.com/about/our-business/policies/digital-archive		DOI			2013	PDF, HTML	clinical cardiology, non-clinical cardiology, cardiovascular medicine, cardiovascular surgery	English	https://www.journals.elsevier.com/indian-heart-journal/editorial-board	Double blind peer review	https://www.elsevier.com/journals/indian-heart-journal/0019-4832/guide-for-authors	https://www.journals.elsevier.com/indian-heart-journal/	https://www.elsevier.com/journals/indian-heart-journal/0019-4832/guide-for-authors	Yes	https://www.elsevier.com/editors/perk/plagiarism-complaints/plagiarism-detection	53	https://www.elsevier.com/journals/indian-heart-journal/0019-4832/open-access-journal	Yes	http://www.sciencedirect.com/science/article/pii/S0019483215002709	CC BY-NC-ND		https://www.elsevier.com/journals/indian-heart-journal/0019-4832/open-access-journal	Yes	Sherpa/Romeo	False
Indian Journal of Anaesthesia	http://www.ijaweb.org		0019-5049	0976-2817	Wolters Kluwer Medknow Publications	Indian Society of Anaesthesiologists	Wolters Kluwer Medknow Publications	India	No	http://www.ijaweb.org/contributors.asp#msppc				http://www.ijaweb.org/contributors.asp#msppc							LOCKSS, CLOCKSS, Portico, PMC/Europe PMC/PMC Canada			http://www.ijaweb.org/aboutus.asp	Yes	DOI	Yes	http://medknow.com/statistics.asp	2002	PDF, HTML, ePUB	anaesthesiology, critical care medicine, trauma and emergency medicine, pain and palliative care, disaster management	English	http://www.ijaweb.org/editorialboard.asp	Double blind peer review	http://www.ijaweb.org/contributors.asp#tep	http://www.ijaweb.org/contributors.asp#soj	http://www.ijaweb.org/contributors.asp			36	http://www.ijaweb.org/aboutus.asp	Yes	http://www.ijaweb.org/temp/IndianJAnaesth61136-4785127_131731.pdf	CC BY-NC-SA		http://www.ijaweb.org/aboutus.asp	Yes	Sherpa/Romeo	False
Indian Journal of Dermatology	http://www.e-ijd.org/		0019-5154	1998-3611	Wolters Kluwer Medknow Publications	Indian Association of Dermatologists, Venereologists and Leprologists, West Bengal	Wolters Kluwer Medknow Publications	India	No	http://www.e-ijd.org/contributors.asp				http://www.e-ijd.org/contributors.asp							LOCKSS, CLOCKSS, Portico, PMC/Europe PMC/PMC Canada			http://www.e-ijd.org/aboutus.asp	Yes	DOI	Yes	http://medknow.com/statistics.asp	2005	PDF, HTML, ePUB	dermatology, skin diseases, dermatological therapeutics, cosmetic dermatology, dermatopathology	English	http://www.e-ijd.org/editorialboard.asp	Blind peer review	http://www.e-ijd.org/contributors.asp#ep	http://www.e-ijd.org/aboutus.asp	http://www.e-ijd.org/contributors.asp			47	http://www.e-ijd.org/aboutus.asp	Yes	http://www.e-ijd.org/temp/IndianJDermatol62129-4714184_130541.pdf	CC BY-NC-SA		http://www.e-ijd.org/aboutus.asp	Yes	Sherpa/Romeo	False
Indian Journal of Orthopaedics	http://ijoonline.com/	IJO	0019-5413	1998-3727	Wolters Kluwer Medknow Publications	Indian Orthopaedic Association	Wolters Kluwer Medknow Publications	India	No	http://www.ijoonline.com/aboutus.asp				http://www.ijoonline.com/aboutus.asp							LOCKSS, CLOCKSS, Portico, PMC/Europe PMC/PMC Canada			http://www.ijoonline.com/aboutus.asp	Yes	DOI	Yes	http://medknow.com/statistics.asp	2005	PDF, HTML, ePUB	clinical orthopaedics, orthopaedic surgery	English	http://ijoonline.com/editorialboard.asp	Double blind peer review	http://www.ijoonline.com/contributors.asp	http://ijoonline.com/aboutus.asp	http://ijoonline.com/contributors.asp			53	http://ijoonline.com/aboutus.asp	Yes	http://www.ijoonline.com/article.asp?issn=0019-5413;year=2017;volume=51;issue=1;spage=36;epage=42;aulast=Mahesha	CC BY-NC-SA		http://www.ijoonline.com/aboutus.asp	Yes	Sherpa/Romeo	False
Indian Journal of Psychiatry	http://www.indianjpsychiatry.org/		0019-5545	1998-3794	Wolters Kluwer Medknow Publications	Indian Psychiatric Society	Wolters Kluwer Medknow Publications	India	No	http://www.indianjpsychiatry.org/aboutus.asp				http://www.indianjpsychiatry.org/aboutus.asp							LOCKSS, CLOCKSS, Portico, PMC/Europe PMC/PMC Canada			http://www.indianjpsychiatry.org/aboutus.asp	Yes	DOI	Yes	http://medknow.com/statistics.asp	2007	PDF, HTML, ePUB	psychiatry	English	http://www.indianjpsychiatry.org/editorialboard.asp	Double blind peer review	http://www.indianjpsychiatry.org/contributors.asp	http://www.indianjpsychiatry.org/aboutus.asp	http://www.indianjpsychiatry.org/contributors.asp			34	http://www.indianjpsychiatry.org/aboutus.asp	Yes	http://www.indianjpsychiatry.org/article.asp?issn=0019-5545;year=2016;volume=58;issue=3;spage=241;epage=243;aulast=Sathyanarayana	CC BY-NC-SA		http://www.indianjpsychiatry.org/aboutus.asp	Yes	Sherpa/Romeo	False
Indian Journal of Public Health	http://www.ijph.in/		0019-557X	2229-7693	Wolters Kluwer Medknow Publications	Indian Public Health Association	Wolters Kluwer Medknow Publications	India	Yes	http://www.ijph.in/contributors.asp	4000	INR - Indian Rupee	Yes	http://www.ijph.in/contributors.asp	570	INR - Indian Rupee					CLOCKSS, LOCKSS			http://www.ijph.in/aboutus.asp	Yes	DOI	Yes	http://www.medknow.com/statistics.asp	2010	PDF, HTML, ePUB	health protection, public health policy, nutrition, behavioural medicine, epidemiology, public health	English	http://www.ijph.in/editorialboard.asp	Double blind peer review	http://www.ijph.in/contributors.asp#editorial	http://www.ijph.in/contributors.asp#scope	http://www.ijph.in/contributors.asp			21	http://www.ijph.in/aboutus.asp	Yes	http://www.ijph.in/downloadpdf.asp?issn=0019-557X;year=2017;volume=61;issue=4;spage=233;epage=238;aulast=Devara;type=2	CC BY-NC-SA		http://www.ijph.in/aboutus.asp	Yes		False
Informes de la Construccion	http://informesdelaconstruccion.revistas.csic.es		0020-0883	1988-3234	Consejo Superior de Investigaciones Científicas		OJS	Spain	No	http://informesdelaconstruccion.revistas.csic.es/index.php/informesdelaconstruccion/about/editorialPolicies				http://informesdelaconstruccion.revistas.csic.es/index.php/informesdelaconstruccion/about/editorialPolicies												DOI			1971	PDF, HTML, XML	architecture and engineering, environment, construction systems, testing techniques, building compound research	English, Spanish; Castilian	http://informesdelaconstruccion.revistas.csic.es/index.php/informesdelaconstruccion/about/editorialTeam	Double blind peer review	http://informesdelaconstruccion.revistas.csic.es/index.php/informesdelaconstruccion/about/editorialPolicies#peerReviewProcess	http://informesdelaconstruccion.revistas.csic.es/index.php/informesdelaconstruccion/about/editorialPolicies#focusAndScope	http://informesdelaconstruccion.revistas.csic.es/index.php/informesdelaconstruccion/about/submissions#authorGuidelines			48	http://informesdelaconstruccion.revistas.csic.es/index.php/informesdelaconstruccion/about/editorialPolicies#openAccessPolicy	Yes	http://informesdelaconstruccion.revistas.csic.es/index.php/informesdelaconstruccion/article/view/3630/4089	CC BY-NC		http://informesdelaconstruccion.revistas.csic.es/index.php/informesdelaconstruccion/index	Yes		False
Arquivos do Instituto Biológico	http://www.biologico.sp.gov.br/arquivos_bio.php	Journal of Animal, Plant Sanity and Environmental Protection	0020-3653	1808-1657	Zeppelini Editorial	Instituto Biológico	SciELO Brazil	Brazil	Yes	http://www.biologico.sp.gov.br/rev_arq_intrucoes.php	50	BRL - Brazilian Real		http://www.biologico.sp.gov.br/rev_arq_intrucoes.php											Yes	DOI			2000	PDF	veterinary, animal sanity, vegetal sanity, food security, synantropic pests, agronomy	English, Portuguese, Spanish; Castilian	http://www.biologico.sp.gov.br/rev_arq_comite.php	Peer review	http://www.biologico.sp.gov.br/rev_arq_procedimento.php	http://www.biologico.sp.gov.br/rev_arq_intrucoes.php	http://www.biologico.sp.gov.br/rev_arq_intrucoes.php			48	http://www.biologico.sp.gov.br/rev_arq_procedimento.php		http://www.biologico.sp.gov.br/arquivos_bio.php AND http://www.scielo.br/scielo.php?script=sci_serial&pid=1808-1657&lng=en&nrm=iso	CC BY-NC		http://www.biologico.sp.gov.br/rev_arq_intrucoes.php	Yes		False
Revista do Instituto de Estudos Brasileiros	http://www.scielo.br/scielo.php?script=sci_serial&pid=0020-3874&lng=en&nrm=iso		0020-3874		Instituto de Estudos Brasileiros			Brazil	No	http://www.scielo.br/revistas/rieb/iinstruc.htm				http://www.scielo.br/revistas/rieb/iinstruc.htm											Yes		Yes	http://www.scielo.br/statjournal.php?lang=en&issn=0020-3874&collection=scl	2012	PDF, HTML, XML	social networks	English, Portuguese	http://www.scielo.br/revistas/rieb/iedboard.htm	Peer review	http://www.scielo.br/revistas/rieb/iinstruc.htm	http://www.scielo.br/revistas/rieb/iinstruc.htm	http://www.scielo.br/revistas/rieb/iinstruc.htm			16	http://www.scielo.br/revistas/rieb/isubscrp.htm	Yes	http://www.scielo.br/scielo.php?script=sci_arttext&pid=S0020-38742016000200075&lng=en&nrm=iso&tlng=pt	CC BY-NC		http://www.scielo.br/revistas/rieb/iaboutj.htm	Yes		False
Annali dell'Istituto Superiore di Sanità	http://www.annali-iss.eu/		0021-2571	2384-8553	Istituto Superiore di Sanità	Istituto Superiore di Sanità	OJS	Italy	No	http://www.annali-iss.eu/about/editorialPolicies#custom-1				http://www.annali-iss.eu/about/editorialPolicies#custom-1										http://www.iss.it/anna/	Yes	DOI	Yes	http://www.annali-iss.eu/	2001	PDF, HTML	public health, biomedicine	English	http://www.annali-iss.eu/about/editorialTeam	Blind peer review	http://www.annali-iss.eu/about/editorialPolicies#peerReviewProcess	http://www.annali-iss.eu/about/editorialPolicies#focusAndScope	http://www.annali-iss.eu/about/submissions#authorGuidelines			8	http://www.annali-iss.eu/about/editorialPolicies#openAccessPolicy	Yes	http://www.annali-iss.eu/article/view/244	CC BY-NC-ND		http://www.annali-iss.eu/about/submissions#copyrightNotice	Yes	Sherpa/Romeo	True
Jornal de Pediatria	http://www.scielo.br/jped		0021-7557	1678-4782	Elsevier	Brazilian Society of Pediatrics	www.sciencedirect.com	Netherlands	No	https://www.elsevier.com/journals/jornal-de-pediatria/0021-7557/open-access-journal				https://www.elsevier.com/journals/jornal-de-pediatria/0021-7557/open-access-journal					Yes	http://www.elsevier.com/about/corporate-responsibility/research-4-life/research-4-life-programs	CLOCKSS, Portico	Koninklijke Bibliotheek		https://www.elsevier.com/about/our-business/policies/digital-archive	Yes	DOI			2013	PDF, HTML	pediatrics, infants, adolescents, newborns, children	English	https://www.journals.elsevier.com/jornal-de-pediatria/editorial-board	Double blind peer review	https://www.elsevier.com/journals/jornal-de-pediatria/0021-7557/guide-for-authors	https://www.journals.elsevier.com/jornal-de-pediatria/	https://www.elsevier.com/journals/jornal-de-pediatria/0021-7557/guide-for-authors	Yes	https://www.elsevier.com/editors/perk/plagiarism-complaints/plagiarism-detection	12	https://www.elsevier.com/journals/jornal-de-pediatria/0021-7557/open-access-journal	Yes	http://www.sciencedirect.com/science/article/pii/S0021755713000041	CC BY-NC-ND		https://www.elsevier.com/journals/jornal-de-pediatria/0021-7557/open-access-journal	Yes		False
Journal of Glaciology	https://www.cambridge.org/core/journals/journal-of-glaciology		0022-1430	1727-5652	Cambridge University Press	International Glaciological Society	Cambridge Core	United Kingdom	Yes	https://www.cambridge.org/core/journals/journal-of-glaciology/information/open-access-information-for-journal-of-glaciology-and-annals-of-glaciology	1200	GBP - Pound Sterling		https://www.cambridge.org/core/journals/journal-of-glaciology/information/open-access-information-for-journal-of-glaciology-and-annals-of-glaciology					Yes	https://www.cambridge.org/core/journals/journal-of-glaciology/information/open-access-information-for-journal-of-glaciology-and-annals-of-glaciology	LOCKSS, CLOCKSS, Portico			https://www.cambridge.org/core/services/agents/journals-for-agents	Yes	DOI			2016	PDF, HTML	glaciology, atmosphere, climate, palaeoclimatology, environment	English	https://www.cambridge.org/core/journals/journal-of-glaciology/information/editorial-board	Blind peer review	https://www.cambridge.org/core/journals/journal-of-glaciology/information/instructions-contributors	https://www.cambridge.org/core/journals/journal-of-glaciology	https://www.cambridge.org/core/journals/journal-of-glaciology/information/instructions-contributors			18	https://www.cambridge.org/core/journals/journal-of-glaciology/information/open-access-information-for-journal-of-glaciology-and-annals-of-glaciology	Yes	https://www.cambridge.org/core/journals/journal-of-glaciology/article/div-classtitlean-11-year-record-of-mass-balance-of-brewster-glacier-new-zealand-determined-using-a-geostatistical-approachdiv/C9904FB23A8ABDA1B6865313A0C6BFD9	CC BY-NC-ND		https://www.cambridge.org/core/journals/journal-of-glaciology/information/open-access-information-for-journal-of-glaciology-and-annals-of-glaciology	Yes	Sherpa/Romeo	False
Journal of Postgraduate Medicine	http://www.jpgmonline.com/		0022-3859	0972-2823	Wolters Kluwer Medknow Publications	Staff Society, Seth GS Medical College and KEM Hospital, Mumbai	Wolters Kluwer Medknow Publications	India	No	http://www.jpgmonline.com/contributors.asp#Man				http://www.jpgmonline.com/contributors.asp#Man							LOCKSS, CLOCKSS, Portico, PMC/Europe PMC/PMC Canada			http://www.jpgmonline.com/aboutus.asp	Yes	DOI	Yes	http://medknow.com/statistics.asp	1990	PDF, HTML, ePUB	medicine, surgery, clinical medicine	English	http://www.jpgmonline.com/editorialboard.asp	Double blind peer review	http://www.jpgmonline.com/contributors.asp#Edi	http://www.jpgmonline.com/contributors.asp#Sco	http://www.jpgmonline.com/contributors.asp			40	http://www.jpgmonline.com/aboutus.asp	Yes	http://www.jpgmonline.com/article.asp?issn=0022-3859;year=2016;volume=62;issue=4;spage=228;epage=234;aulast=Surase	CC BY-NC-SA		http://www.jpgmonline.com/aboutus.asp	Yes	Sherpa/Romeo	False
Kemija u Industriji	http://www.hdki.hr/kui		0022-9830	1334-9090	Croatian Society of Chemical Engineers	Croatian Society of Chemical Engineers		Croatia	No	http://silverstripe.fkit.hr/kui/about-the-journal/copyright-policy/				http://silverstripe.fkit.hr/kui/about-the-journal/copyright-policy/								Croatian Web Archive	Hrcak	http://haw.nsk.hr/en/publikacija/685/kemija-u-industriji	Yes	DOI			2004	PDF	chemical engineering, chemistry, technology, biochemical engineering	Croatian, English	http://silverstripe.fkit.hr/kui/about-the-journal/editorial-office/	Blind peer review	http://silverstripe.fkit.hr/kui/authors/author-instructions/	http://silverstripe.fkit.hr/kui/about-the-journal/	http://silverstripe.fkit.hr/kui/authors/author-instructions/	Yes	http://silverstripe.fkit.hr/kui/authors/author-instructions/	24	http://silverstripe.fkit.hr/kui/about-the-journal/copyright-policy/	Yes	http://silverstripe.fkit.hr/kui/issue-archive/article/512	CC BY		http://silverstripe.fkit.hr/kui/about-the-journal/copyright-policy/	Yes	Sherpa/Romeo	True
???????? ????????	http://hirurgiya.com.ua	Klinicheskaia khirurgiia	0023-2130	2522-1396	Liga-Inform ltd.	Association of Surgeons of Ukraine, A.A.Shalimov National Institute of Surgery and Transplantology	OJS	Ukraine	No	https://hirurgiya.com.ua/index.php/journal/instructions				https://hirurgiya.com.ua/index.php/journal/instructions								Vernadsky National Library of Ukraine		https://hirurgiya.com.ua/index.php/journal/journal-policies	Yes	DOI			2008	PDF	general surgery, urology, traumatology	Russian, Ukrainian	https://hirurgiya.com.ua/index.php/journal/about/editorialTeam	Double blind peer review	https://hirurgiya.com.ua/index.php/journal/review-procedure	https://hirurgiya.com.ua/index.php/journal/focus-and-scope	https://hirurgiya.com.ua/index.php/journal/instructions	Yes	https://hirurgiya.com.ua/index.php/journal/journal-policies	12	https://hirurgiya.com.ua/index.php/journal/index			CC BY		https://hirurgiya.com.ua/index.php/journal/journal-policies	Yes		True
Knjižnica	http://knjiznica.zbds-zveza.si/index.php/knjiznica	Library	0023-2424	1581-7903	Zveza Bibliotekarskih Društev Slovenije, Narodna in Univerzitetna Knjižnica	Slovenian Library Association	OJS	Slovenia	No	http://knjiznica.zbds-zveza.si/index.php/knjiznica/about/editorialPolicies				http://knjiznica.zbds-zveza.si/index.php/knjiznica/about/editorialPolicies								Dlib		http://www.dlib.si/details/URN:NBN:SI:spr-L1LNKFLF	Yes	URN - when deposited in the digital repository of the National and University Library, each article is assigned an active and permanent URN identifier			2000	PDF	library science, information science, book studies, reading research	Croatian, English, German, Slovenian	http://knjiznica.zbds-zveza.si/index.php/knjiznica/about/editorialTeam	Double blind peer review	http://knjiznica.zbds-zveza.si/index.php/knjiznica/about/editorialPolicies#focusAndScope	http://knjiznica.zbds-zveza.si/index.php/knjiznica/about/editorialPolicies#focusAndScope	http://knjiznica.zbds-zveza.si/index.php/knjiznica/about/submissions#authorGuidelines			8	http://knjiznica.zbds-zveza.si/index.php/knjiznica/about/editorialPolicies#openAccessPolicy			CC BY-NC		http://knjiznica.zbds-zveza.si/index.php/knjiznica/about/editorialPolicies	Yes		True
Koers : Bulletin for Christian Scholarship	http://www.koersjournal.org.za	Koers : Bulletin vir Christelike Wetenskap	0023-270X	2304-8557	Scriber Editorial Systems	Koers Association	Scriber Editorial Systems	South Africa	Yes	http://www.koers.co.za/uploads/5/7/5/2/5752154/koers_stylesheet_2015.pdf	513	ZAR - Rand		http://www.koers.co.za/uploads/5/7/5/2/5752154/koers_stylesheet_2015.pdf							LOCKSS			http://www.koersjournal.org.za/index.php/koers/about/editorialPolicies#archiving	Yes	DOI			1934	PDF	theology, education, ethics, practical, modernity	Afrikaans, English	http://www.koersjournal.org.za/index.php/koers/about/editorialTeam	Double blind peer review	http://www.koersjournal.org.za/index.php/koers/about/editorialPolicies#peerReviewProcess	http://www.koersjournal.org.za/index.php/koers/about/editorialPolicies#focusAndScope	http://www.koers.co.za/uploads/5/7/5/2/5752154/koers_stylesheet_2015.pdf	Yes	http://www.koersjournal.org.za/index.php/koers/pages/view/ethics	12	http://www.koersjournal.org.za/index.php/koers/about/editorialPolicies#openAccessPolicy	Yes	http://www.koersjournal.org.za/index.php/koers/article/view/2227/pdf	CC BY		http://www.koersjournal.org.za/index.php/koers/about/submissions#copyrightNotice	Yes	Sherpa/Romeo	True
Kunst og Kultur	https://www.idunn.no/kk		0023-5415	1504-3029	Scandinavian University Press/Universitetsforlaget	National Museum of Art, Architecture and Design	Idunn	Norway	No	https://www.idunn.no/kk				https://www.idunn.no/kk											Yes	DOI			2017	PDF, HTML, XML	history of arts, art, culture	Bokmål, Norwegian; Norwegian Bokmål, Norwegian Nynorsk; Nynorsk, Norwegian	https://www.idunn.no/kk#editors	Double blind peer review	https://www.idunn.no/kk#about	https://www.idunn.no/kk#about	https://www.idunn.no/file/ci/66482151/Forfatterveiledning_Kunst_og_Kultur_2016.pdf			52	https://www.idunn.no/kk#rights	Yes	https://www.idunn.no/kk/2017/01-02/munch_a_modern_velzquez	CC BY-NC		https://www.idunn.no/kk#rights	Yes	Sherpa/Romeo	True
Icelandic Medical Journal	http://www.laeknabladid.is/	Læknablaðið	0023-7213		The Icelandic Medical Association	The Icelandic Medical Association		Iceland	No	http://www.laeknabladid.is/about				http://www.laeknabladid.is/about								Landsbókasafn		http://www.laeknabladid.is/fragangur-greina/fyrir-hofunda/nr/2814					2000	PDF, HTML	medicine, Iceland	Icelandic	http://www.laeknabladid.is/about	Blind peer review	http://www.laeknabladid.is/fragangur-greina/fyrir-ritryna/nr/3173	http://www.laeknabladid.is/fragangur-greina/fyrir-hofunda/nr/2814	http://www.laeknabladid.is/fragangur-greina/fyrir-hofunda/	Yes	http://www.laeknabladid.is/fragangur-greina/fyrir-hofunda/nr/2814	10	http://www.laeknabladid.is/about			CC BY-NC-ND		http://www.laeknabladid.is/about	Yes		False
Landtechnik	http://www.landtechnik-online.eu			0023-8082	Kuratorium für Technik und Bauwesen in der Landwirtschaft e. V.		OJS	Germany	No	https://www.landtechnik-online.eu/ojs-2.4.5/index.php/landtechnik/about/editorialPolicies#custom-0				https://www.landtechnik-online.eu/ojs-2.4.5/index.php/landtechnik/about/editorialPolicies#custom-0								German National Library		https://www.landtechnik-online.eu/ojs-2.4.5/index.php/landtechnik/about/editorialPolicies#openAccessPolicy	Yes	DOI			2015	PDF	agriculture, agricultural engineering, crop production, livestock husbandry, energy production, information technology	English, German	https://www.landtechnik-online.eu/ojs-2.4.5/index.php/landtechnik/about/editorialPolicies#custom-2	Blind peer review	https://www.landtechnik-online.eu/ojs-2.4.5/index.php/landtechnik/about/editorialPolicies#peerReviewProcess	https://www.landtechnik-online.eu/ojs-2.4.5/index.php/landtechnik/about/editorialPolicies#focusAndScope	https://www.landtechnik-online.eu/ojs-2.4.5/index.php/landtechnik/about/submissions#authorGuidelines			16	https://www.landtechnik-online.eu/ojs-2.4.5/index.php/landtechnik/about/editorialPolicies#openAccessPolicy	Yes	https://www.landtechnik-online.eu/ojs-2.4.5/index.php/landtechnik/article/view/2664	CC BY		https://www.landtechnik-online.eu/ojs-2.4.5/index.php/landtechnik/about/submissions#copyrightNotice	Yes	Sherpa/Romeo, EZB Regensburg	True
Revista Lecciones y Ensayos	http://www.derecho.uba.ar/publicaciones/lye/index.php		0024-0079	2362-4620	Editorial Universitaria de Buenos Aires	Universidad de Buenos Aires, Facultad de Derecho		Argentina	No	http://www.derecho.uba.ar/publicaciones/lye/pub_lye_comopublicar.php				http://www.derecho.uba.ar/publicaciones/lye/pub_lye_comopublicar.php										http://biblioteca.derecho.uba.ar/bibder/busqueda/index.asp	Yes				2003	PDF	Argentina, Latin America, law	Spanish; Castilian	http://www.derecho.uba.ar/publicaciones/lye/pub_lye_autoridades.php	Double blind peer review	http://www.derecho.uba.ar/publicaciones/lye/pub_lye_comopublicar.php	http://www.derecho.uba.ar/publicaciones/lye/index.php	http://www.derecho.uba.ar/publicaciones/lye/pautas-formales-de-publicacion-lye.pdf	Yes	http://www.derecho.uba.ar/publicaciones/lye/pub_lye_comopublicar.php	12	http://www.derecho.uba.ar/publicaciones/lye/pub_lye_numeros.php			Publisher's own license	Attribution, No Commercial Usage, No Derivatives	http://www.derecho.uba.ar/publicaciones/lye/pub_lye_numeros.php	Yes		False
Linguistica	http://revije.ff.uni-lj.si/linguistica		0024-3922	2350-420X	Znanstvena založba Filozofske fakultete Univerze v Ljubljani (Ljubljana University Press, Faculty of Arts)	University of Ljubljana, Faculty of Arts	OJS	Slovenia	No	http://revije.ff.uni-lj.si/linguistica/about/editorialPolicies#openAccessPolicy				http://revije.ff.uni-lj.si/linguistica/about/editorialPolicies#openAccessPolicy								dLib		http://www.dlib.si/results/?query=%27keywords%3dlinguistica%27&pageSize=25&frelation=Linguistica+(Ljubljana)	Yes	DOI			2008	PDF	linguistics, modern linguistics	English, French, German, Italian, Slovenian	http://revije.ff.uni-lj.si/linguistica/about/editorialTeam	Double blind peer review	http://revije.ff.uni-lj.si/linguistica/about/editorialPolicies#peerReviewProcess	http://revije.ff.uni-lj.si/linguistica/index	http://revije.ff.uni-lj.si/linguistica/about/submissions#authorGuidelines			12	http://revije.ff.uni-lj.si/linguistica/about/editorialPolicies#openAccessPolicy			CC BY-SA		http://revije.ff.uni-lj.si/linguistica/about/submissions#copyrightNotice	Yes		True
Maal og Minne	http://ojs.novus.no/index.php/MOM		0024-855X	1890-5455	Novus forlag	Bymålslaget	OJS	Norway	No	http://ojs.novus.no/index.php/MOM/about/editorialPolicies#custom-2				http://ojs.novus.no/index.php/MOM/about/editorialPolicies#custom-2										http://ojs.novus.no/index.php/MOM/about/editorialPolicies#archiving	Yes				2007	PDF	Norwegian language, Norwegian language memories, medieval literature, Norwegian place names	Bokmål, Norwegian; Norwegian Bokmål, Danish, English, Norwegian Nynorsk; Nynorsk, Norwegian, Swedish	http://ojs.novus.no/index.php/MOM/about/editorialPolicies#custom-0	Blind peer review	http://ojs.novus.no/index.php/MOM/about/editorialPolicies#peerReviewProcess	http://ojs.novus.no/index.php/MOM/about/editorialPolicies#focusAndScope	http://ojs.novus.no/index.php/MOM/about/submissions#authorGuidelines			26	http://ojs.novus.no/index.php/MOM/about/editorialPolicies#custom-3			CC BY-SA		http://ojs.novus.no/index.php/MOM/about/editorialPolicies#custom-1	Yes		True
Indonesian Journal of Geography	http://jurnal.ugm.ac.id/ijg/		0024-9521		Universitas Gadjah Mada		OJS	Indonesia	Yes	http://jurnal.ugm.ac.id/ijg/about/submissions#authorGuidelines	100	USD - US Dollar		http://jurnal.ugm.ac.id/ijg/about/submissions#authorGuidelines															1986	PDF	remote sensing, physical geography, human geography, development studies, rural and regional planning, urban studies	English	http://jurnal.ugm.ac.id/ijg/about/editorialTeam	Double blind peer review	http://jurnal.ugm.ac.id/ijg/about/editorialPolicies#peerReviewProcess	http://jurnal.ugm.ac.id/ijg/about/editorialPolicies#focusAndScope	http://jurnal.ugm.ac.id/ijg/about/submissions#authorGuidelines			8	http://jurnal.ugm.ac.id/ijg/about/editorialPolicies#openAccessPolicy			CC BY-NC		http://jurnal.ugm.ac.id/ijg/about/editorialPolicies#openAccessPolicy	Yes		False
Matematicki Vesnik	http://www.vesnik.math.rs		0025-5165	2406-0682	Mathematical Society of Serbia	Mathematical Society of Serbia	math.rs	Serbia	No	http://vesnik.math.rs/index.html				http://vesnik.math.rs/index.html															1993	PDF	mathematics	English	http://vesnik.math.rs/board.html	Peer review	http://vesnik.math.rs/forauthors.html	http://vesnik.math.rs/index.html	http://vesnik.math.rs/forauthors.html			25	http://vesnik.math.rs/statement.html	Yes	http://vesnik.math.rs/latest/browse.php?p=latest	CC BY		http://vesnik.math.rs/statement.html	Yes		True
Medicina (Buenos Aires)	http://www.medicinabuenosaires.com/		0025-7680	1669-9106	Fundación Revista Medicina	Fundación Revista Medicina	WordPress	Argentina	Yes	http://www.medicinabuenosaires.com/media/etc/reglamento_.pdf	3000	ARS - Argentine Peso	Yes	http://www.medicinabuenosaires.com/	300	ARS - Argentine Peso			Yes	http://www.medicinabuenosaires.com/reglamento/	CLOCKSS	National Llibrary of Medicine		http://www.ncbi.nlm.nih.gov/pubmed/	Yes	PMID			2003	PDF	medicine, epidemiology, immunology, infectious diseases	English, Spanish; Castilian	http://www.medicinabuenosaires.com/comite-de-redaccion/	Blind peer review	http://www.medicinabuenosaires.com/reglamento/	http://www.medicinabuenosaires.com/	http://www.medicinabuenosaires.com/reglamento/			8	http://www.medicinabuenosaires.com			CC BY		http://www.medicinabuenosaires.com/	Yes	Sherpa/Romeo	False
Medicine	http://journals.lww.com/md-journal		0025-7974	1536-5964	Wolters Kluwer		Wolters Kluwer	United States	Yes	http://journals.lww.com/md-journal/Documents/Files%20and%20Resources/For%20Authors/Medicine%20Instructions%20for%20Authors.pdf	1200	USD - US Dollar		http://journals.lww.com/md-journal/Documents/Files%20and%20Resources/For%20Authors/Medicine%20Instructions%20for%20Authors.pdf							PMC/Europe PMC/PMC Canada			http://journals.lww.com/md-journal/Pages/OpenAccess.aspx		DOI			2014	PDF, HTML, ePUB	medicine, health	English	http://journals.lww.com/md-journal/Pages/Open-Access-Editorial-Board.aspx	Peer review	http://journals.lww.com/md-journal/pages/aboutthejournal.aspx	http://journals.lww.com/md-journal/pages/aboutthejournal.aspx	http://journals.lww.com/md-journal/Documents/Files%20and%20Resources/For%20Authors/Medicine%20Instructions%20for%20Authors.pdf	Yes	http://journals.lww.com/md-journal/Documents/Files%20and%20Resources/For%20Authors/Medicine%20Instructions%20for%20Authors.pdf	3	http://journals.lww.com/md-journal/Pages/OpenAccess.aspx	Yes	http://journals.lww.com/md-journal/Fulltext/2014/08010/High_Body_Mass_Index_Reduces_Glomerular_Filtration.1.aspx	CC BY-NC-ND		http://journals.lww.com/md-journal/Pages/OpenAccess.aspx	Yes	Sherpa/Romeo	True
Journal of the Meteorological Society of Japan	https://www.jstage.jst.go.jp/browse/jmsj	JMSJ	0026-1165		Meteorologial Society of Japan		J-STAGE	Japan	Yes	http://jmsj.metsoc.jp/instructions.html	220000	JPY - Yen		http://jmsj.metsoc.jp/instructions.html					Yes	http://jmsj.metsoc.jp/instructions.html					Yes	DOI	Yes	http://jmsj.metsoc.jp/most_accessed/index.html	2018	PDF	meteorology, climate, weather, atmosphere	English	http://jmsj.metsoc.jp/editors/index.html	Peer review	http://jmsj.metsoc.jp/instructions.html	http://jmsj.metsoc.jp/instructions.html	http://jmsj.metsoc.jp/instructions.html			6	http://jmsj.metsoc.jp/copy.html			CC BY		http://jmsj.metsoc.jp/copy.html	Yes		False
Micronesica	http://micronesica.org		0026-279X		University of Guam Press	University of Guam	University of Guam Press	Guam	Yes	http://micronesica.org/instructions-authors	350	USD - US Dollar		http://micronesica.org/instructions-authors											Yes				1999	PDF	Guam, Micronesia, tropical Western Pacific, biology, physical anthropology, agriculture	English	http://micronesica.org/about-micronesica	Peer review	http://micronesica.org/instructions-authors	http://micronesica.org/instructions-authors	http://micronesica.org/instructions-authors			12	http://micronesica.org/about-micronesica			CC BY-NC-ND		http://micronesica.org/about-micronesica	Yes		False
Bulletin of the Mineral Research and Exploration	http://dergi.mta.gov.tr/index.php		0026-4563		General Directorate of Mineral Research and Exploration			Turkey	No	https://dergi.mta.gov.tr/index.php?id=sayfa&i=1				https://dergi.mta.gov.tr/index.php?id=sayfa&i=1												DOI	Yes	http://dergipark.gov.tr/bulletinofmre/issue/28546/315757	1936	PDF	geology, geophysics, mining	English	https://dergi.mta.gov.tr/index.php?id=sayfa&i=7	Peer review	https://dergi.mta.gov.tr/index.php?id=sayfa&i=3	https://dergi.mta.gov.tr/index.php?id=sayfa&i=3	https://dergi.mta.gov.tr/index.php?id=sayfa&i=3	Yes	https://dergi.mta.gov.tr/index.php?id=sayfa&i=1	10	https://dergi.mta.gov.tr/index.php?id=sayfa&i=1			CC BY-NC-ND		https://dergi.mta.gov.tr/index.php	Yes	Sherpa/Romeo	False
Mljekarstvo	http://hrcak.srce.hr/index.php?show=casopis&id_casopis=33		0026-704X	1846-4025	Croatian Dairy Union		Hrcak	Croatia	No	http://hrcak.srce.hr/mljekarstvo?lang=en				http://hrcak.srce.hr/mljekarstvo?lang=en									Hrcak	http://hrcak.srce.hr/mljekarstvo?lang=en		DOI	Yes	http://hrcak.srce.hr/index.php?show=clanak&id_clanak_jezik=256947	2001	PDF	agronomy, biotechnoogy, food technology, dairy	Croatian, English	http://hrcak.srce.hr/upute/impressum_en_Mljekarstvo.pdf	Peer review	http://hrcak.srce.hr/upute/guide_authors_Mljekarstvo.pdf	http://hrcak.srce.hr/mljekarstvo?lang=en	http://hrcak.srce.hr/upute/guide_authors_Mljekarstvo.pdf			12	http://hrcak.srce.hr/mljekarstvo?lang=en			CC BY-NC		http://hrcak.srce.hr/mljekarstvo?lang=en	Yes	Sherpa/Romeo	False
Moneta e Credito	http://www.monetaecredito.info		0026-9611	2037-3651	Associazione Economia civile	Associazione Economia civile	OJS	Italy	No	http://ojs.uniroma1.it/index.php/monetaecredito/about/editorialPolicies#focusAndScope				http://ojs.uniroma1.it/index.php/monetaecredito/about/editorialPolicies#focusAndScope											Yes				2009	PDF	political economy, financial crisis	Italian	http://ojs.uniroma1.it/index.php/monetaecredito/about/editorialTeam	Double blind peer review	http://ojs.uniroma1.it/index.php/monetaecredito/about/editorialPolicies#peerReviewProcess	http://ojs.uniroma1.it/index.php/monetaecredito/about/editorialPolicies#focusAndScope	http://ojs.uniroma1.it/index.php/monetaecredito/about/submissions#onlineSubmissions			20	http://ojs.uniroma1.it/index.php/monetaecredito/about/editorialPolicies#focusAndScope	Yes	http://ojs.uniroma1.it/index.php/monetaecredito/article/view/13162/12976	CC BY-NC-ND		http://ojs.uniroma1.it/index.php/monetaecredito/about/submissions#copyrightNotice	Yes		True
Journal of Nepal Medical Association	http://www.jnma.com.np		0028-2715	1815-672X	Nepal Medical Association	Nepal Medical Association	OJS	Nepal	No	http://jnma.com.np/jnma/index.php/jnma/about				http://jnma.com.np/jnma/index.php/jnma/about									NMA Library	http://jnma.com.np/jnma/index.php/jnma/about	Yes	we are communicating to get doi, hopefully from 2017			2005	PDF	medical association, medical sciences, medical education, public health	English	http://jnma.com.np/jnma/index.php/jnma/about/editorialTeam	Double blind peer review	http://jnma.com.np/jnma/index.php/jnma/about/submissions	http://jnma.com.np/jnma/index.php/jnma/about/submissions	http://jnma.com.np/jnma/index.php/jnma/about/submissions	Yes	http://jnma.com.np/jnma/index.php/jnma/about	10	http://jnma.com.np/jnma/index.php/jnma/about	Yes	http://jnma.com.np/jnma/index.php/jnma/article/view/2829/2364	CC BY		http://jnma.com.np/jnma/index.php/jnma/about	Yes		True
Norsk Filosofisk Tidsskrift	https://www.idunn.no/nft?languageId=2		0029-1943	1504-2901	Scandinavian University Press/Universitetsforlaget		Idunn	Norway	No	https://www.idunn.no/nft?languageId=2				https://www.idunn.no/nft?languageId=2											Yes	DOI			2017	PDF, HTML, XML	philosophy, Norwegian philosophy, Scandinavian philosophy	Bokmål, Norwegian; Norwegian Bokmål, Norwegian Nynorsk; Nynorsk, Norwegian	https://www.idunn.no/nft?languageId=2#editors	Double blind peer review	https://www.idunn.no/nft?languageId=2#about	https://www.idunn.no/nft?languageId=2#about	https://www.idunn.no/nft?languageId=2#authors			52	https://www.idunn.no/nft?languageId=2#rights	Yes	https://www.idunn.no/nft/2017/01-02/hva_legitimerer_filosofi_i_norge	CC BY-NC		https://www.idunn.no/nft#rights	Yes	Sherpa/Romeo	True
North Carolina Libraries	http://www.ncl.ecu.edu/index.php/NCL		0029-2540		North Carolina Library Association		North Carolina Library Association	United States	No	http://www.ncl.ecu.edu/index.php/NCL/announcement/view/1				http://www.ncl.ecu.edu/index.php/NCL/announcement/view/1											Yes				1942	PDF	librarianship, media centers, academic libraries	English	http://www.ncl.ecu.edu/index.php/NCL/about/editorialTeam	Peer review	http://www.ncl.ecu.edu/index.php/NCL/about/editorialPolicies#peerReviewProcess	http://www.ncl.ecu.edu/index.php/NCL/about/editorialPolicies#focusAndScope	http://www.ncl.ecu.edu/index.php/NCL/about/submissions#onlineSubmissions			12	http://www.ncl.ecu.edu/index.php/NCL/about/editorialPolicies#openAccessPolicy			Publisher's own license	Attribution	http://www.ncl.ecu.edu/index.php/NCL/announcement/view/1	Yes		False
The Nucleus	http://thenucleuspak.org.pk/		0029-5698	2306-6539	Pakistan Institute of Nuclear Science and Technology (PINSTECH)	Pakistan Atomic Energy Commission	OJS	Pakistan	No	http://thenucleuspak.org.pk/index.php/Nucleus/about/editorialPolicies#custom-0				http://thenucleuspak.org.pk/index.php/Nucleus/about/editorialPolicies#custom-0											Yes				2016	PDF	applied sciences, engineering, computer engineering, natural sciences	English	http://thenucleuspak.org.pk/index.php/Nucleus/about/editorialTeam	Blind peer review	http://thenucleuspak.org.pk/index.php/Nucleus/about/editorialPolicies#peerReviewProcess	http://thenucleuspak.org.pk/index.php/Nucleus/about/editorialPolicies#focusAndScope	http://thenucleuspak.org.pk/index.php/Nucleus/about/submissions#authorGuidelines			11	http://thenucleuspak.org.pk/index.php/Nucleus/about/editorialPolicies#openAccessPolicy			CC BY		http://thenucleuspak.org.pk/index.php/Nucleus/about/submissions#copyrightNotice	Yes		False
Nukleonika	http://www.degruyter.com/view/j/nuka		0029-5922		Sciendo	Institute of Nuclear Chemistry and Technology, Poland	Sciendo	Poland	Yes	http://www.degruyter.com/view/supplement/s00295922_Instruction_for_Authors.pdf	45	EUR - Euro		http://www.degruyter.com/view/supplement/s00295922_Instruction_for_Authors.pdf							Portico			http://www.degruyter.com/page/859	Yes	DOI			2014	PDF	nuclear chemistry, nuclear physics, radiation chemistry, radiobiology, nuclear techniques	English	http://www.degruyter.com/view/j/nuka	Double blind peer review	http://www.degruyter.com/view/j/nuka	http://www.degruyter.com/view/j/nuka	http://www.degruyter.com/view/supplement/s00295922_Instruction_for_Authors.pdf	Yes	http://degruyteropen.com/dgopen-takes-a-further-step-to-ward-off-plagiarism/	27	http://degruyteropen.com/you/journal-author/open-access-statement/	Yes	http://www.degruyter.com/view/j/nuka.2015.60.issue-1/nuka-2015-0003/nuka-2015-0003.xml?format=INT	CC BY-NC-ND		http://www.degruyter.com/view/supplement/s00295922_License_to_Publish.pdf	Yes	Sherpa/Romeo	True
Onderstepoort Journal of Veterinary Research	http://www.ojvr.org		0030-2465	2219-0635	AOSIS	Agricultural Research Council, Onderstepoort Veterinary Institute	OJS	South Africa	No	http://ojvr.org/index.php/ojvr/pages/view/faq_author#3				http://ojvr.org/index.php/ojvr/pages/view/authors#3							Portico			http://ojvr.org/index.php/ojvr/pages/view/about#7	Yes	DOI			2003	PDF, HTML, ePUB, XML	veterinary medicine, infectious animal diseases, parasitic diseases	English	http://ojvr.org/index.php/ojvr/pages/view/editorial-team	Double blind peer review	http://ojvr.org/index.php/ojvr/pages/view/about#5	http://ojvr.org/index.php/ojvr/pages/view/about#2	http://ojvr.org/index.php/ojvr/pages/view/authors	Yes	http://ojvr.org/index.php/ojvr/pages/view/newsubmission#4	16	http://ojvr.org/index.php/ojvr/pages/view/about#4	Yes	http://ojvr.org/index.php/ojvr/article/view/863/html	CC BY		http://ojvr.org/index.php/ojvr/pages/view/authors#4	Yes	Sherpa/Romeo	True
Paediatrica Indonesiana	https://paediatricaindonesiana.org/		0030-9311		Indonesian Pediatric Society Publishing House	Indonesian Pediatric Society	OJS	Indonesia	No	https://www.paediatricaindonesiana.org/index.php/paediatrica-indonesiana/about/editorialPolicies#custom-1				https://www.paediatricaindonesiana.org/index.php/paediatrica-indonesiana/about/editorialPolicies#custom-1							PKP PN			https://paediatricaindonesiana.org/index.php/paediatrica-indonesiana	Yes	DOI			2001	PDF	paediatrics, perinatal medicine, child health	English	https://paediatricaindonesiana.org/index.php/paediatrica-indonesiana/Editorial	Peer review	https://paediatricaindonesiana.org/index.php/paediatrica-indonesiana/about/editorialPolicies#peerReviewProcess	https://paediatricaindonesiana.org/index.php/paediatrica-indonesiana/about/editorialPolicies#focusAndScope	https://paediatricaindonesiana.org/index.php/paediatrica-indonesiana/pages/view/instruction			24	https://www.paediatricaindonesiana.org/index.php/paediatrica-indonesiana/about/editorialPolicies#openAccessPolicy	Yes	https://paediatricaindonesiana.org/index.php/paediatrica-indonesiana/article/view/441	CC BY-NC-SA		https://paediatricaindonesiana.org/index.php/paediatrica-indonesiana/about/submissions#copyrightNotice	Yes		True
Pakistan Armed Forces Medical Journal	http://www.pafmj.org		0030-9648	2411-8842	The Army Press	Pakistan Army Medical and Dental Corps		Pakistan	Yes	http://www.pafmj.org/policy.php?pid=2#top14	1000	PKR - Pakistan Rupee	Yes	http://www.pafmj.org/cms_page.php?id=1	5000	PKR - Pakistan Rupee													2005	PDF	medicine, dentistry, biomedical science, public health, medical education	English	http://www.pafmj.org/aboutus.php?id=17	Double blind peer review	http://www.pafmj.org/policy.php?pid=2#top8	http://www.pafmj.org/policy.php?pid=2#top4	http://www.pafmj.org/cms_page.php?id=1	Yes	http://www.pafmj.org/policy.php?pid=2#top10	24	http://www.pafmj.org/policy.php?pid=2#top15	Yes	http://www.pafmj.org/showdetails.php?id=761&t=o	CC BY-NC		http://www.pafmj.org/policy.php?pid=2#top18	Yes		False
Papéis Avulsos de Zoologia	http://www.scielo.br/scielo.php/script_sci_serial/pid_0031-1049/lng_en/nrm_iso		0031-1049	1807-0205	Universidade de São Paulo	Universidade de São Paulo, Museu de Zoologia	SciELO Brazil	Brazil	No	http://www.scielo.br/revistas/paz/iinstruc.htm#004				http://www.scielo.br/revistas/paz/iinstruc.htm#004											Yes	DOI	Yes	http://www.scielo.br/statjournal.php?lang=en&issn=0031-1049	2002	PDF, HTML, XML	biological sciences	English, Portuguese, Spanish; Castilian	http://www.scielo.br/revistas/paz/iedboard.htm	Peer review	http://www.scielo.br/revistas/paz/iinstruc.htm	http://www.scielo.br/revistas/paz/iinstruc.htm	http://www.scielo.br/revistas/paz/iinstruc.htm			8	http://www.scielo.br/revistas/paz/isubscrp.htm	Yes	http://www.scielo.br/scielo.php?script=sci_arttext&pid=S0031-10492014003200001&lng=en&nrm=iso&tlng=en	CC BY		http://www.scielo.br/scielo.php/script_sci_serial/pid_0031-1049/lng_en/nrm_iso	Yes		False
Pensamiento. Revista de Investigación e Información Filosófica	https://revistas.upcomillas.es/index.php/pensamiento/index		0031-4749	2386-5822	Universidad Pontificia Comillas	Universidad Pontificia Comillas. Facultad de Ciencias Humanas y Sociales. Departamento de Filosofía, Humanidades y Comunicación	OJS	Spain	No	https://revistas.upcomillas.es/index.php/pensamiento/about/editorialPolicies#custom-2				https://revistas.upcomillas.es/index.php/pensamiento/about/editorialPolicies#custom-2											Yes	DOI			2016	PDF	Philosophy, Religion, Moral, Freedom, Democracy	Spanish; Castilian	https://revistas.upcomillas.es/index.php/pensamiento/about/editorialTeam	Peer review	https://revistas.upcomillas.es/index.php/pensamiento/about/editorialPolicies#peerReviewProcess	https://revistas.upcomillas.es/index.php/pensamiento/about/editorialPolicies#focusAndScope	https://revistas.upcomillas.es/index.php/pensamiento/about/submissions#authorGuidelines			52	https://revistas.upcomillas.es/index.php/pensamiento/about/editorialPolicies#openAccessPolicy			CC BY-NC-ND		https://revistas.upcomillas.es/index.php/pensamiento/about/submissions#copyrightNotice	Yes		False
Phytopathologia Mediterranea	http://www.fupress.net/index.php/pm/index		0031-9465	1593-2095	Firenze University Press	Mediterranean Phytopathological Union	OJS	Italy	Yes	http://www.fupress.net/index.php/pm/about/editorialPolicies#custom-3	350	EUR - Euro		http://www.fupress.net/index.php/pm/about/editorialPolicies#custom-3								Biblioteche Nazionali Centrali di Roma e Firenze, Magazzini Digitali		http://www.fupress.net/index.php/pm/about/editorialPolicies#custom-2	Yes	DOI			2014	PDF	plant pathology, diseases of Mediterranean crops	English	http://www.fupress.net/index.php/pm/about/editorialTeam	Peer review	http://www.fupress.net/index.php/pm/about/editorialPolicies#peerReviewProcess	http://www.fupress.net/index.php/pm/about/editorialPolicies#focusAndScope	http://www.fupress.net/public/journals/7/pm_guidelines.pdf			8	http://www.fupress.net/index.php/pm/about/editorialPolicies#openAccessPolicy	Yes	http://www.fupress.net/index.php/pm/article/view/16230/17298	CC BY		http://www.fupress.net/index.php/pm/about/editorialPolicies#openAccessPolicy	Yes	Sherpa/Romeo	True
Platinum Metals Review	http://www.technology.matthey.com/about/platinum-metals-review/		0032-1400	1471-0676	Johnson Matthey Plc			United Kingdom	No	http://www.technology.matthey.com/about/open-access-policy/#Funding				http://www.technology.matthey.com/about/open-access-policy/#Funding								British Library		http://explore.bl.uk/primo_library/libweb/action/search.do?dscnt=0&frbg=&scp.scps=scope%3A%28BLCONTENT%29&tab=local_tab&dstmp=1455524226718&srt=rank&ct=search&mode=Basic&vl(488279563UI0)=any&dum=true&tb=t&indx=2&vl(freeText0)=Johnson%20Matthey%20Technology%20Review&vid=BLVU1&fn=search	Yes	DOI			1998	PDF, HTML	chemistry, platinum, platinum group metals	English	http://www.technology.matthey.com/about/the-editorial-board/	Peer review	http://www.technology.matthey.com/for-authors/#peerreview	http://www.technology.matthey.com/about/platinum-metals-review/	http://www.technology.matthey.com/for-authors/			12	http://www.technology.matthey.com/about/open-access-policy/			CC BY-NC-ND		http://www.technology.matthey.com/about/open-access-policy/#License	Yes		False
Politicka Misao	https://hrcak.srce.hr/politicka-misao?lang=en	Croatian Political Science Review	0032-3241	1846-8721	University of Zagreb, Faculty of Political Science		HRCAK, EBSCO, SCOPUS	Croatia	No	https://hrcak.srce.hr/politicka-misao?lang=en				https://hrcak.srce.hr/politicka-misao?lang=en											Yes	DOI	Yes	https://hrcak.srce.hr/index.php?show=clanak&id_clanak_jezik=280562	2014	PDF	political science, international relations, political history, European Union, sociology, social sciences	Croatian, English	https://hrcak.srce.hr/politicka-misao?lang=en	Double blind peer review	https://hrcak.srce.hr/upute/guide_authors_Croatian_Political_Science_Review.pdf	https://hrcak.srce.hr/upute/guide_authors_Croatian_Political_Science_Review.pdf	https://hrcak.srce.hr/upute/guide_authors_Croatian_Political_Science_Review.pdf	Yes	https://hrcak.srce.hr/upute/guide_authors_Croatian_Political_Science_Review.pdf	3	https://hrcak.srce.hr/politicka-misao?lang=en			CC BY-NC-ND		https://hrcak.srce.hr/politicka-misao?lang=en	Yes		True
Postepy Higieny i Medycyny Doswiadczalnej	http://www.phmd.pl	Advances in Hygiene and Experimental Medicine	0032-5449	1732-2693	Index Copernicus International S.A.	Institute of Immunology and Experimental Therapy	Index Copernicus International S.A.	Poland	Yes	http://www.phmd.pl/page.php?IDpage=113&p=4	1100	PLN - Zloty		http://www.phmd.pl/page.php?IDpage=113&p=4													Yes	http://phmd.publisherspanel.com/resources/html/article/details?id=142571	2004	PDF	hygiene, allergy, immunology, experimental medicine, microbiology, medicine	English, Polish	http://www.phmd.pl/page.php?IDpage=116&p=3	Double blind peer review	http://www.phmd.pl/page.php?IDpage=113&p=4	http://www.phmd.pl/page.php?IDpage=113&p=4	http://www.phmd.pl/page.php?IDpage=113&p=4			8	http://www.phmd.pl/text.php?ids=1065	Yes	http://www.phmd.pl/text.php?ids=1065	CC BY-NC		http://www.phmd.pl/text.php?ids=1065	Yes		False
Prismet	https://www.journals.uio.no/index.php/prismet		0032-8847	2535-311X	Kirkelig Pedagogisk Senter (IKO)		OJS	Norway	Yes	https://www.journals.uio.no/index.php/prismet/about/submissions#authorGuidelines	7000	NOK - Norwegian Krone		https://www.journals.uio.no/index.php/prismet/about/submissions#authorGuidelines											Yes	DOI			2017	PDF	religious education, pedagogy, religion, theology, didactics	Bokmål, Norwegian; Norwegian Bokmål, Danish, English, Swedish	https://www.journals.uio.no/index.php/prismet/about/editorialTeam	Double blind peer review	https://www.journals.uio.no/index.php/prismet/about/editorialPolicies#peerReviewProcess	https://www.journals.uio.no/index.php/prismet/about/editorialPolicies#focusAndScope	https://www.journals.uio.no/index.php/prismet/about/submissions#authorGuidelines			24	https://www.journals.uio.no/index.php/prismet/about/editorialPolicies#openAccessPolicy			CC BY-NC		https://www.journals.uio.no/index.php/prismet/about/submissions#copyrightNotice	Yes		True
Przeglad Dermatologiczny	http://www.termedia.pl/Journal/Przeglad_Dermatologiczny-56	Dermatology Review	0033-2526	2084-9893	Termedia Publishing House	Polish Dermatological Association	Termedia Publishing House - Bentus	Poland	No	http://www.termedia.pl/Journal/Przeglad_Dermatologiczny-56/For-authors				http://www.termedia.pl/Journal/Przeglad_Dermatologiczny-56/For-authors								Polish Medical Library (GBL)		http://www.termedia.pl/Journal/Przeglad_Dermatologiczny-56/Indexing	Yes	DOI			2009	PDF, HTML	dermatology	English, Polish	http://www.termedia.pl/Journal/Przeglad_Dermatologiczny-56/Info	Double blind peer review	http://www.termedia.pl/Journal/Przeglad_Dermatologiczny-56/For-authors	http://www.termedia.pl/Journal/Przeglad_Dermatologiczny-56/For-authors	http://www.termedia.pl/Journal/Przeglad_Dermatologiczny-56/For-authors	Yes	http://www.termedia.pl/Journal/Przeglad_Dermatologiczny-56/For-authors	12	http://www.termedia.pl/Journal/Przeglad_Dermatologiczny-56/Info			CC BY-NC-SA		http://www.termedia.pl/Journal/Przeglad_Dermatologiczny-56/Info	Yes		True
Psyche: A Journal of Entomology	https://www.hindawi.com/journals/psyche/		0033-2615	1687-7438	Hindawi Limited		Hindawi	United Kingdom	Yes	https://www.hindawi.com/journals/psyche/apc/	600	USD - US Dollar		https://www.hindawi.com/journals/psyche/apc/					Yes	https://www.hindawi.com/journals/psyche/apc/	LOCKSS, Portico			https://www.hindawi.com/journals/psyche/ai/	Yes	DOI			1874	PDF, HTML, ePUB	entomology, insect	English	https://www.hindawi.com/journals/psyche/editors/	Blind peer review	https://www.hindawi.com/journals/psyche/workflow/	https://www.hindawi.com/journals/psyche/aims/	https://www.hindawi.com/journals/psyche/guidelines/	Yes	https://www.hindawi.com/journals/psyche/ethics/	15	https://www.hindawi.com/journals/psyche/	Yes	https://www.hindawi.com/journals/psyche/2015/134630/	CC BY		https://www.hindawi.com/journals/psyche/guidelines/	Yes	Sherpa/Romeo	True
Psychologica Belgica	http://www.psychologicabelgica.com/		0033-2879	2054-670X	Ubiquity Press	Belgian Association for Psychological Science	Ubiquity Press	United Kingdom	Yes	http://www.psychologicabelgica.com/about/submissions/	300	GBP - Pound Sterling		http://www.psychologicabelgica.com/about/submissions/							LOCKSS, CLOCKSS			http://www.psychologicabelgica.com/about/editorialPolicies#archiving	Yes	DOI	Yes	http://www.psychologicabelgica.com/article/view/pb.au	2004	PDF, HTML, XML	experimental psychology, social psychology, cognitive psychology, personality psychology, psychopathology, health psychology	English	http://www.psychologicabelgica.com/about/editorialTeam	Double blind peer review	http://www.psychologicabelgica.com/about/editorialPolicies#peerReviewProcess	http://www.psychologicabelgica.com/about/editorialPolicies#focusAndScope	http://www.psychologicabelgica.com/about/submissions#authorGuidelines	Yes	http://www.psychologicabelgica.com/about/editorialPolicies#custom-0	4	http://www.psychologicabelgica.com/about/editorialPolicies#openAccessPolicy	Yes	http://www.psychologicabelgica.com/article/view/pb.au/227	CC BY		http://www.psychologicabelgica.com/about/editorialPolicies#openAccessPolicy	Yes	Sherpa/Romeo	True
Quaderni di Sociologia	http://qds.revues.org		0033-4952	2421-5848	Rosenberg & Sellier		revues.org	Italy	No	http://qds.revues.org/?page=informations				http://qds.revues.org/?page=informations											Yes	DOI, Handles	Yes	https://logs.openedition.org/awstats.pl?config=qds	2010	HTML	Sociology of Work, Gender Studies, Sociology of Consumption, Sociology of Culture, Urban Sociology, Sociology of Health	English, Italian	http://qds.revues.org/494	Double blind peer review	http://qds.revues.org/?page=informations	http://qds.revues.org/506	http://qds.revues.org/497			24	http://qds.revues.org/?page=informations	Yes	http://qds.revues.org/391	CC BY-NC-ND		http://qds.revues.org/?page=informations	Yes		False
Reinwardtia	http://e-journal.biologi.lipi.go.id/index.php/reinwardtia	Reinwardtia: A Journal on Taxonomy Botany, Plant Sociology and Ecology	0034-365X	2337-8824	Indonesian Institute of Sciences	Reserch Center for Biology	OJS	Indonesia	No	http://e-journal.biologi.lipi.go.id/index.php/reinwardtia/about/editorialPolicies#custom-2				http://e-journal.biologi.lipi.go.id/index.php/reinwardtia/about/editorialPolicies#custom-2											Yes			http://e-journal.biologi.lipi.go.id/index.php/reinwardtia/about/statistics?statisticsYear=2015	1970	PDF	plant taxonomy, ecology, ethnobotany	English	http://e-journal.biologi.lipi.go.id/index.php/reinwardtia/about/editorialTeam	Blind peer review	http://e-journal.biologi.lipi.go.id/index.php/reinwardtia/about/editorialPolicies#peerReviewProcess	http://e-journal.biologi.lipi.go.id/index.php/reinwardtia/about/editorialPolicies#focusAndScope	http://e-journal.biologi.lipi.go.id/index.php/reinwardtia/about/submissions#authorGuidelines	Yes	http://e-journal.biologi.lipi.go.id/index.php/reinwardtia/about/editorialPolicies#custom-1	12	http://e-journal.biologi.lipi.go.id/index.php/reinwardtia/about/editorialPolicies#openAccessPolicy		http://e-journal.biologi.lipi.go.id/index.php/reinwardtia/index	CC BY-NC-SA		http://e-journal.biologi.lipi.go.id/index.php/reinwardtia/about/editorialPolicies#openAccessPolicy	Yes		False
Rheumatology	http://www.termedia.pl/Czasopismo/Reumatologia-18	Reumatologia	0034-6233	2084-9834	Termedia Publishing House	National Institute of Geriatrics, Rheumatology and Rehabilitation and the Polish Rheumatological Society	Termedia Publishing House - Bentus	Poland	No	http://www.termedia.pl/Journal/Reumatologia-18/For-authors				http://www.termedia.pl/Journal/Reumatologia-18/For-authors							PMC/Europe PMC/PMC Canada			https://www.ncbi.nlm.nih.gov/nlmcatalog/101693	Yes	DOI			2005	PDF, HTML	rheumatology	English	http://www.termedia.pl/Journal/Reumatologia-18/Info	Blind peer review	http://www.termedia.pl/Journal/Reumatologia-18/For-authors	http://www.termedia.pl/Journal/Reumatologia-18/For-authors	http://www.termedia.pl/Journal/Reumatologia-18/For-authors	Yes	http://www.termedia.pl/Journal/Reumatologia-18/For-authors	10	http://www.termedia.pl/Journal/Reumatologia-18/Info			CC BY-NC-SA		http://www.termedia.pl/Journal/Reumatologia-18/Info	Yes	PMC	True
Revista Argentina de Cardiología	http://ppct.caicyt.gov.ar/index.php/rac/index		0034-7000	1850-3748	Sociedad Argentina de Cardiología	Sociedad Argentina de Cardiologia	OJS	Argentina	No	http://ppct.caicyt.gov.ar/files/site/cardio-reglamento-es.pdf				http://ppct.caicyt.gov.ar/files/site/cardio-reglamento-es.pdf										http://ppct.caicyt.gov.ar/index.php/rac	Yes				2010	PDF	cardiology	English, Spanish; Castilian	http://ppct.caicyt.gov.ar/index.php/rac/about/displayMembership/45	Double blind peer review	http://ppct.caicyt.gov.ar/index.php/rac/about/editorialPolicies#peerReviewProcess	http://ppct.caicyt.gov.ar/index.php/rac/about/editorialPolicies#focusAndScope	http://ppct.caicyt.gov.ar/files/site/cardio-reglamento-es.pdf			16	http://ppct.caicyt.gov.ar/index.php/rac/about/editorialPolicies#openAccessPolicy			CC BY-NC-SA		http://ppct.caicyt.gov.ar/index.php/rac/about/submissions#copyrightNotice	Yes		False
Revista Brasileira de Anestesiologia	http://www.scielo.br/scielo.php/script_sci_serial/pid_0034-7094/lng_en/nrm_iso		0034-7094	1806-907X	Sociedade Brasileira de Anestesiologia	Sociedade Brasileira de Anestesiologia	SciELO Brazil	Brazil	No	http://www.scielo.br/revistas/rba/iinstruc.htm#03				http://www.scielo.br/revistas/rba/iinstruc.htm#03											Yes	DOI	Yes	http://www.scielo.br/statjournal.php?lang=en&issn=0034-7094	2001	PDF, HTML, XML	biological sciences, health sciences	English, Portuguese, Spanish; Castilian	http://www.scielo.br/revistas/rba/iedboard.htm	Double blind peer review	http://www.scielo.br/revistas/rba/iinstruc.htm	http://www.scielo.br/revistas/rba/iaboutj.htm	http://www.scielo.br/revistas/rba/iinstruc.htm			21	http://www.scielo.br/revistas/rba/isubscrp.htm	Yes	http://www.scielo.br/scielo.php?script=sci_arttext&pid=S0034-70942014000600391&lng=en&nrm=iso&tlng=en	CC BY-NC-ND		http://www.scielo.br/scielo.php/script_sci_serial/pid_0034-7094/lng_en/nrm_iso	Yes		False
Revista Brasileira de Economia	http://www.scielo.br/scielo.php/script_sci_serial/pid_0034-7140/lng_en/nrm_iso		0034-7140	1806-9134	Fundação Getúlio Vargas		SciELO Brazil	Brazil	Yes	http://www.scielo.br/revistas/rbe/iinstruc.htm	360	BRL - Brazilian Real		http://www.scielo.br/revistas/rbe/iinstruc.htm#send											Yes	DOI	Yes	http://www.scielo.br/statjournal.php?lang=en&issn=0034-7140	1999	PDF, HTML, XML	applied social sciences	English, Portuguese	http://www.scielo.br/revistas/rbe/iedboard.htm	Peer review	http://www.scielo.br/revistas/rbe/iinstruc.htm	http://www.scielo.br/revistas/rbe/iinstruc.htm	http://www.scielo.br/revistas/rbe/iinstruc.htm			20	http://www.scielo.br/revistas/rbe/isubscrp.htm	Yes	http://www.scielo.br/scielo.php?script=sci_arttext&pid=S0034-71402015000100003&lng=en&nrm=iso&tlng=en	CC BY		http://www.scielo.br/revistas/rbe/isubscrp.htm	Yes		False
Revista Brasileira de Enfermagem	http://www.scielo.br/scielo.php?script=sci_serial&pid=0034-7167&lng=en&nrm=iso		0034-7167	1984-0446	Associação Brasileira de Enfermagem		SciELO Brazil	Brazil	Yes	http://www.scielo.br/revistas/reben/iinstruc.htm	1100	BRL - Brazilian Real	Yes	http://www.scielo.br/revistas/reben/iinstruc.htm	220	BRL - Brazilian Real													1983	PDF, HTML, XML	nursing	English, Portuguese, Spanish; Castilian	http://www.scielo.br/revistas/reben/iedboard.htm	Double blind peer review	http://www.scielo.br/revistas/reben/iinstruc.htm	http://www.scielo.br/revistas/reben/iinstruc.htm	http://www.scielo.br/revistas/reben/iinstruc.htm			21	http://www.scielo.br/revistas/reben/iaboutj.htm	Yes	http://www.scielo.br/scielo.php?script=sci_arttext&pid=S0034-71672016000601017&lng=en&nrm=iso&tlng=en	CC BY		http://www.scielo.br/revistas/reben/iaboutj.htm			False
Revista Brasileira de Estudos Pedagógicos	http://rbep.inep.gov.br/index.php/RBEP	RBEP	0034-7183	2176-6681	Instituto Nacional de Estudos e Pesquisas Educacionais Anísio Teixeira	Instituto Nacional de Estudos e Pesquisas Educacionais Anísio Teixeira	OJS	Brazil	No	http://www.rbep.inep.gov.br/index.php/RBEP/about/editorialPolicies#custom0				http://www.rbep.inep.gov.br/index.php/RBEP/about/editorialPolicies#custom0											Yes	DOI			2007	PDF	Brazilian education, educational policies, pedagogy	English, Portuguese, Spanish; Castilian	http://rbep.inep.gov.br/index.php/RBEP/about/editorialTeam	Blind peer review	http://rbep.inep.gov.br/index.php/RBEP/about/editorialPolicies#peerReviewProcess	http://rbep.inep.gov.br/index.php/RBEP/about/editorialPolicies#focusAndScope	http://rbep.inep.gov.br/index.php/RBEP/about/submissions#authorGuidelines			24	http://rbep.inep.gov.br/index.php/RBEP/about/editorialPolicies#openAccessPolicy			CC BY-NC		http://rbep.inep.gov.br/index.php/RBEP/about/editorialPolicies#openAccessPolicy	Yes		False
Revista Brasileira de Odontologia	http://revista.aborj.org.br/index.php/rbo	Brazilian Journal of Dentistry	0034-7272	1984-3747	Associação Brasileira de Odontologia	Associação Brasileira de Odontologia - Rio de Janeiro	OJS	Brazil	No	http://revista.aborj.org.br/index.php/rbo/about/editorialPolicies#focusAndScope				http://revista.aborj.org.br/index.php/rbo/about/editorialPolicies#focusAndScope										http://revista.aborj.org.br/index.php/rbo/about/editorialPolicies#openAccessPolicy	Yes				2008	PDF, HTML	dentistry, oral medicine, odontology	English	http://revista.aborj.org.br/index.php/rbo/about/editorialTeam	Blind peer review	http://revista.aborj.org.br/index.php/rbo/about/editorialPolicies#sectionPolicies	http://revista.aborj.org.br/index.php/rbo/about/editorialPolicies#focusAndScope	http://revista.aborj.org.br/index.php/rbo/about/submissions#authorGuidelines	Yes	http://revista.aborj.org.br/index.php/rbo/about/submissions#authorGuidelines	13	http://revista.aborj.org.br/index.php/rbo/about/editorialPolicies#openAccessPolicy			CC BY		http://revista.aborj.org.br/index.php/rbo/about/editorialPolicies#custom-3	Yes		False
Revista Brasileira de Oftalmologia	http://www.scielo.br/scielo.php?script=sci_serial&lng=pt&pid=0034-7280&nrm=iso		0034-7280	1982-8551	Sociedade Brasileira de Oftalmologia		SciELO Brazil	Brazil	No	http://www.scielo.br/revistas/rbof/iinstruc.htm#001				http://www.scielo.br/revistas/rbof/iinstruc.htm#001										http://www.scielo.br/revistas/rbof/iinstruc.htm	Yes				2007	PDF, HTML, XML	ophthalmology	English, Portuguese, Spanish; Castilian	http://www.scielo.br/revistas/rbof/iedboard.htm	Peer review	http://www.scielo.br/revistas/rbof/iinstruc.htm	http://www.scielo.br/revistas/rbof/iinstruc.htm	http://www.scielo.br/revistas/rbof/iinstruc.htm	Yes	http://www.scielo.br/revistas/rbof/iinstruc.htm	13	http://www.scielo.br/revistas/rbof/isubscrp.htm	Yes	http://www.scielo.br/scielo.php?script=sci_arttext&pid=S0034-72802015000500284&lng=en&nrm=iso/&tlng=en	CC BY		http://www.scielo.br/scielo.php?script=sci_serial&lng=pt&pid=0034-7280&nrm=iso	Yes		False
Revista Brasileira de Otorrinolaringologia	http://www.scielo.br/scielo.php/script_sci_serial/pid_0034-7299/lng_pt/nrm_iso		0034-7299		Sociedade Brasileira de Otorrinolaringologia		SciELO Brazil		No Information																				2001		health sciences
Revista Brasileira de Política Internacional	http://www.scielo.br/scielo.php?script=sci_serial&pid=0034-7329&lng=pt&nrm=iso		0034-7329	1983-3121	Instituto Brasileiro de Relações Internacionais		SciELO Brazil	Brazil	No	http://www.scielo.br/revistas/rbpi/iinstruc.htm				http://www.scielo.br/revistas/rbpi/iinstruc.htm											Yes		Yes	http://analytics.scielo.org/w/accesses?document=S0034-73292015000200005&collection=scl	1997	PDF, HTML, XML	international relations, brazilian foreign policies	English, Portuguese, Spanish; Castilian	http://www.scielo.br/revistas/rbpi/iedboard.htm	Double blind peer review	http://www.scielo.br/revistas/rbpi/iinstruc.htm#001	http://www.scielo.br/revistas/rbpi/iinstruc.htm	http://www.scielo.br/revistas/rbpi/iinstruc.htm#002	Yes	http://www.scielo.br/revistas/rbpi/iinstruc.htm	14	http://www.scielo.br/revistas/rbpi/isubscrp.htm	Yes	http://www.scielo.br/scielo.php?script=sci_arttext&pid=S0034-73292016000200202&lng=en&nrm=iso&tlng=en	CC BY		http://www.scielo.br/revistas/rbpi/iaboutj.htm#003	Yes		False
Revista Ceres	http://www.scielo.br/scielo.php?script=sci_serial&pid=0034-737X&lng=en&nrm=iso		0034-737X	2177-3491	Universidade Federal De Viçosa		SciELO Brazil	Brazil	Yes	http://www.scielo.br/revistas/rceres/iinstruc.htm	250	BRL - Brazilian Real		http://www.scielo.br/revistas/rceres/iinstruc.htm											Yes	DOI			2010	PDF, HTML, XML	plant culture, biotechnology, veterinary medicine, food science, agricultural egineering	English, Portuguese	http://www.scielo.br/revistas/rceres/iedboard.htm	Peer review	http://www.scielo.br/revistas/rceres/iinstruc.htm	http://www.scielo.br/revistas/rceres/iinstruc.htm	http://www.scielo.br/revistas/rceres/iinstruc.htm			16	http://www.scielo.br/revistas/rceres/isubscrp.htm	Yes	http://www.scielo.br/scielo.php?script=sci_arttext&pid=S0034-737X2015000500438&lng=en&nrm=iso&tlng=pt	CC BY		http://www.scielo.br/revistas/rceres/iaboutj.htm			False
Revista Chilena de Entomología	http://www.biotaxa.org/rce		0034-740X	0718-8994	Sociedad Chilena de Entomología	Sociedad Chilena de Entomología	OJS	Chile	No	https://biotaxa.org/rce				https://biotaxa.org/rce											Yes				2010	PDF	entomology, taxonomy, insects	English, Spanish; Castilian	https://biotaxa.org/rce/about/editorialTeam	Blind peer review	https://biotaxa.org/rce/about/editorialPolicies#peerReviewProcess	https://biotaxa.org/rce/about/editorialPolicies#focusAndScope	https://biotaxa.org/rce/about/submissions#authorGuidelines			4	https://biotaxa.org/rce/about/editorialPolicies#openAccessPolicy			CC BY-NC		https://www.biotaxa.org/rce/about/submissions#copyrightNotice	Yes		False
Revista Cubana de Cirugía	http://www.revcirugia.sld.cu/index.php/cir		0034-7493	1561-2945	Editorial Ciencias Médicas	Sociedad Cubana de Cirugía	www.sld.cu	Cuba	No	http://scielo.sld.cu/revistas/cir/eaboutj.htm				http://scielo.sld.cu/revistas/cir/eaboutj.htm										http://scielo.sld.cu/scielo.php?script=sci_serial&pid=0034-7493&lng=es&nrm=iso		DOI			1995	PDF, HTML	surgery	Spanish; Castilian	http://scielo.sld.cu/revistas/cir/eedboard.htm	Peer review	http://www.revcirugia.sld.cu/index.php/cir/about/editorialPolicies#peerReviewProcess	http://scielo.sld.cu/revistas/cir/einstruc.htm#Alcance	http://scielo.sld.cu/revistas/cir/einstruc.htm#Forma			4	http://www.revcirugia.sld.cu/index.php/cir/about/editorialPolicies#openAccessPolicy			CC BY-NC-SA		http://scielo.sld.cu/revistas/cir/eaboutj.htm#Copyright	Yes		True
Revista Cubana de Estomatología	http://scielo.sld.cu/scielo.php?script=sci_serial&pid=0034-7507&lng=es&nrm=iso		0034-7507	1561-297X	Editorial Ciencias Médicas	Sociedad Cubana de Estomatología	www.sld.cu	Cuba	No	http://scielo.sld.cu/revistas/est/eaboutj.htm				http://scielo.sld.cu/revistas/est/eaboutj.htm											Yes		Yes	http://scielo.sld.cu/statjournal.php?lang=es&issn=0034-7507&collection=cub	1996	PDF, HTML	dental aesthetics, dental implants, pulp diseases	Spanish; Castilian	http://scielo.sld.cu/revistas/est/eedboard.htm	Peer review	http://scielo.sld.cu/revistas/est/einstruc.htm	http://scielo.sld.cu/revistas/est/einstruc.htm	http://scielo.sld.cu/revistas/est/einstruc.htm			4	http://scielo.sld.cu/revistas/est/esubscrp.htm	Yes	http://scielo.sld.cu/scielo.php?script=sci_arttext&pid=S0034-75072016000300004&lng=es&nrm=iso&tlng=es	CC BY-NC-SA		http://scielo.sld.cu/revistas/est/einstruc.htm	Yes		False
Revista Cubana de Farmacia	http://scielo.sld.cu/scielo.php?script=sci_serial&pid=0034-7515&lng=es&nrm=iso		0034-7515	1561-2988	Editorial Ciencias Médicas	Sociedad Cubana de Farmacia e Industria Médico-Farmacéutica de Cuba	www.sld.cu	Cuba	No	http://scielo.sld.cu/revistas/far/eaboutj.htm				http://scielo.sld.cu/revistas/far/eaboutj.htm										http://scielo.sld.cu/scielo.php?script=sci_serial&pid=0034-7515&lng=es&nrm=iso	Yes		Yes	http://scielo.sld.cu/statjournal.php?lang=es&issn=0034-7515&collection=cub	1995	PDF, HTML	Cuban pharmacopoeia, drug development	Spanish; Castilian	http://scielo.sld.cu/revistas/far/eedboard.htm	Peer review	http://scielo.sld.cu/revistas/far/einstruc.htm	http://scielo.sld.cu/revistas/far/einstruc.htm	http://scielo.sld.cu/revistas/far/einstruc.htm			4	http://scielo.sld.cu/revistas/far/esubscrp.htm			CC BY-NC-SA		http://scielo.sld.cu/revistas/far/einstruc.htm	Yes		False
Revista Cubana de Pediatría	http://scielo.sld.cu/scielo.php?script=sci_serial&pid=0034-7531&lng=es&nrm=iso		0034-7531	1561-3119	Editorial Ciencias Médicas	Sociedad Cubana de Pediatría	www.sld.cu	Cuba	No	http://scielo.sld.cu/revistas/ped/eaboutj.htm				http://scielo.sld.cu/revistas/ped/eaboutj.htm										http://scielo.sld.cu/revistas/ped/einstruc.htm	Yes		Yes	http://scielo.sld.cu/revistas/ped/esubscrp.htm	1995	PDF, HTML	dentition, baby diseases	Spanish; Castilian	http://scielo.sld.cu/revistas/ped/eedboard.htm	Blind peer review	http://scielo.sld.cu/revistas/ped/einstruc.htm	http://scielo.sld.cu/scielo.php?script=sci_serial&pid=0034-7531&lng=es&nrm=iso	http://scielo.sld.cu/revistas/ped/einstruc.htm			4	http://scielo.sld.cu/revistas/ped/esubscrp.htm	Yes	http://scielo.sld.cu/scielo.php?script=sci_arttext&pid=S0034-75312016000300005&lng=es&nrm=iso&tlng=es	CC BY-NC-SA		http://scielo.sld.cu/revistas/ped/eaboutj.htm	Yes		False
RAE: Revista de Administração de Empresas	http://www.scielo.br/scielo.php?script=sci_serial&pid=0034-7590&lng=en&nrm=iso	RAE	0034-7590	2178-938X	Fundação Getulio Vargas	Fundação Getulio Vargas	SciELO Brazil	Brazil	No	http://www.scielo.br/revistas/rae/iinstruc.htm				http://www.scielo.br/revistas/rae/iinstruc.htm										http://bibliotecadigital.fgv.br/ojs/index.php/rae	Yes	DOI			1961	PDF	social sciences, administration, management	English, Portuguese, Spanish; Castilian	http://www.scielo.br/revistas/rae/iedboard.htm	Double blind peer review	http://www.scielo.br/revistas/rae/iinstruc.htm	http://www.scielo.br/revistas/rae/iaboutj.htm	http://www.scielo.br/revistas/rae/iinstruc.htm			32	http://www.scielo.br/revistas/rae/isubscrp.htm	Yes	http://www.scielo.br/scielo.php?script=sci_arttext&pid=S0034-75902016000300302&lng=en&nrm=iso&tlng=en	CC BY		http://www.scielo.br/revistas/rae/iaboutj.htm	Yes	Sherpa/Romeo, Diadorim	False
Revista de Administração Pública	http://www.scielo.br/scielo.php?script=sci_serial&pid=0034-7612&lng=en&nrm=iso	RAP	0034-7612		Fundação Getúlio Vargas		SciELO Brazil	Brazil	No	http://www.scielo.br/revistas/rap/iinstruc.htm#03				http://www.scielo.br/revistas/rap/iinstruc.htm#03										http://www.scielo.br/revistas/rap/iinstruc.htm	Yes		Yes	http://www.scielo.br/statjournal.php?lang=en&issn=0034-7612	2006	PDF, HTML, XML	applied social sciences, administration, public administration	English, Portuguese, Spanish; Castilian	http://www.scielo.br/revistas/rap/iedboard.htm	Double blind peer review	http://www.scielo.br/revistas/rap/iinstruc.htm	http://www.scielo.br/revistas/rap/iinstruc.htm	http://www.scielo.br/revistas/rap/iinstruc.htm	Yes	http://www.scielo.br/revistas/rap/iaboutj.htm#03	12	http://www.scielo.br/revistas/rap/isubscrp.htm	Yes	http://www.scielo.br/scielo.php?script=sci_arttext&pid=S0034-76122015000601375&lng=en&nrm=iso&tlng=en	CC BY		http://www.scielo.br/revistas/rap/isubscrp.htm	Yes		False
Revista de Biología Tropical	http://revistas.ucr.ac.cr/index.php/rbt	International Journal of Tropical Biology and Conservancy	0034-7744	0034-7744	Vicerractoría Investigación	University of Costa Rica	OJS	Costa Rica	No	http://revistas.ucr.ac.cr/index.php/rbt/about/submissions#authorGuidelines				http://revistas.ucr.ac.cr/index.php/rbt/about/editorialPolicies#focusAndScope											Yes	DOI			1998	PDF, HTML	tropical biology, conservation, biology, biomedicene	English, Spanish; Castilian	http://revistas.ucr.ac.cr/index.php/rbt/about/editorialPolicies#focusAndScope	Peer review	http://revistas.ucr.ac.cr/index.php/rbt/about/editorialPolicies#focusAndScope	http://revistas.ucr.ac.cr/index.php/rbt/about/editorialPolicies#focusAndScope	http://revistas.ucr.ac.cr/index.php/rbt/about/submissions#authorGuidelines	Yes	http://revistas.ucr.ac.cr/index.php/index/about	5	http://revistas.ucr.ac.cr/index.php/sociales/about/editorialPolicies#openAccessPolicy	Yes	http://revistas.ucr.ac.cr/index.php/index/about	CC BY		http://revistas.ucr.ac.cr/index.php/rbt/about/submissions#copyrightNotice	Yes	Sherpa/Romeo	False
Revista de Dialectología y Tradiciones Populares	http://rdtp.revistas.csic.es		0034-7981	1988-8457	Consejo Superior de Investigaciones Científicas		OJS	Spain	No	http://rdtp.revistas.csic.es/index.php/rdtp/about/editorialPolicies#openAccessPolicy				http://rdtp.revistas.csic.es/index.php/rdtp/about/editorialPolicies												DOI			1996	PDF	ethnography, cultural studies, popular culture, oral tradition, sociolinguistics	English, Spanish; Castilian	http://rdtp.revistas.csic.es/index.php/rdtp/about/editorialTeam	Double blind peer review	http://rdtp.revistas.csic.es/index.php/rdtp/about/editorialPolicies#peerReviewProcess	http://rdtp.revistas.csic.es/index.php/rdtp/about/editorialPolicies#focusAndScope	http://rdtp.revistas.csic.es/index.php/rdtp/about/submissions#authorGuidelines			48	http://rdtp.revistas.csic.es/index.php/rdtp/about/editorialPolicies#openAccessPolicy			CC BY-NC		http://rdtp.revistas.csic.es/index.php/rdtp	Yes		False
Revista de Filosofía	http://www.revistafilosofia.uchile.cl		0034-8236	0718-4360	Universidad de Chile	Sociedad Chilena de Filosofía	OJS	Chile	No	http://www.revistafilosofia.uchile.cl/index.php/RDF/about/submissions#authorGuidelines				http://www.revistafilosofia.uchile.cl/index.php/RDF/about/submissions#authorGuidelines							CLOCKSS			http://www.revistafilosofia.uchile.cl/index.php/RDF/about/editorialPolicies#archiving					2006	PDF	problems of philosophy, history of philosophy	Spanish; Castilian	http://www.revistafilosofia.uchile.cl/index.php/RDF/about/displayMembership/93	Double blind peer review	http://www.revistafilosofia.uchile.cl/index.php/RDF/about/editorialPolicies#peerReviewProcess	http://www.revistafilosofia.uchile.cl/index.php/RDF/about/editorialPolicies#focusAndScope	http://www.revistafilosofia.uchile.cl/index.php/RDF/about/submissions#authorGuidelines			12	http://www.revistafilosofia.uchile.cl/index.php/RDF/about/editorialPolicies#openAccessPolicy			CC BY-NC-ND		http://www.revistafilosofia.uchile.cl/index.php/RDF/about/submissions#copyrightNotice	Yes		True
Revista de Filosofia	http://revistas.ucm.es/index.php/RESF		0034-8244	1988-284X	Universidad Complutense de Madrid	Universidad Complutense de Madrid	Open Journal System/OJS	Spain	No	http://revistas.ucm.es/index.php/RESF/about/submissions#copyrightNotice				http://revistas.ucm.es/index.php/RESF/about/submissions#copyrightNotice											Yes				1987	PDF	philosophy, epistemology, metaphysics, ontology, ethics, logic	English, French, German, Italian, Portuguese, Spanish; Castilian	http://revistas.ucm.es/index.php/RESF/pages/view/equipo	Double blind peer review	http://revistas.ucm.es/index.php/RESF/about/submissions	http://revistas.ucm.es/index.php/RESF/about/editorialPolicies#focusAndScope	http://revistas.ucm.es/index.php/RESF/about/submissions	Yes	http://revistas.ucm.es/index.php/RESF/about/editorialPolicies#custom-3	32	http://revistas.ucm.es/index.php/RESF/about/editorialPolicies#openAccessPolicy			CC BY		http://revistas.ucm.es/index.php/RESF/about/submissions#copyrightNotice	Yes		False
Revista de História	http://revhistoria.usp.br/index.php/br/		0034-8309	2316-9141	Universidade de São Paulo	Universidade de São Paulo, Faculdade de Filosofia, Letras e Ciências Humanas, Departamento de História	OJS	Brazil	No	http://revhistoria.usp.br/index.php/br/publique				http://revhistoria.usp.br/index.php/br/publique									Cariniana Network	http://www.revistas.usp.br/revhistoria/about/editorialPolicies#archiving	Yes				1950	PDF	human sciences, historiography, history	Portuguese	http://revhistoria.usp.br/index.php/br/equipe/editorial	Double blind peer review	http://revhistoria.usp.br/index.php/br/publique	http://revhistoria.usp.br/index.php/br/publique	http://revhistoria.usp.br/index.php/br/publique			24	http://revhistoria.usp.br/index.php/br/publique			CC BY-NC		http://revhistoria.usp.br/index.php/br/publique	Yes		True
Revista de Indias	http://revistadeindias.revistas.csic.es		0034-8341	1988-3188	Consejo Superior de Investigaciones Científicas		OJS	Spain	No	http://revistadeindias.revistas.csic.es/index.php/revistadeindias/about/editorialPolicies				http://revistadeindias.revistas.csic.es/index.php/revistadeindias/about/editorialPolicies												DOI			1996	PDF	Latin American history, Pre-Columbian history, Pre-Hispanic history, sociology, politics	English, French, Portuguese, Spanish; Castilian	http://revistadeindias.revistas.csic.es/index.php/revistadeindias/about/editorialTeam	Peer review	http://revistadeindias.revistas.csic.es/index.php/revistadeindias/about/editorialPolicies#peerReviewProcess	http://revistadeindias.revistas.csic.es/index.php/revistadeindias/about/editorialPolicies#focusAndScope	http://revistadeindias.revistas.csic.es/index.php/revistadeindias/about/submissions#authorGuidelines			48	http://revistadeindias.revistas.csic.es/index.php/revistadeindias/about/editorialPolicies#openAccessPolicy			CC BY-NC		http://revistadeindias.revistas.csic.es/index.php/revistadeindias/index	Yes		False
Revista de Literatura	http://revistadeliteratura.revistas.csic.es/		0034-849X	1988-4192	Consejo Superior de Investigaciones Cientificas		Consejo Superior de Investigaciones Científicas	Spain	No	http://revistadeliteratura.revistas.csic.es/index.php/revistadeliteratura/about/editorialPolicies#openAccessPolicy				http://revistadeliteratura.revistas.csic.es/index.php/revistadeliteratura/about/editorialPolicies#openAccessPolicy												DOI			2001	PDF	analysis and literary criticism, aesthetics and literary style, rhetoric, textual criticism, literature	Spanish; Castilian	http://revistadeliteratura.revistas.csic.es/index.php/revistadeliteratura/about/editorialTeam	Double blind peer review	http://revistadeliteratura.revistas.csic.es/index.php/revistadeliteratura/about/editorialPolicies#peerReviewProcess	http://revistadeliteratura.revistas.csic.es/index.php/revistadeliteratura/about/editorialPolicies#focusAndScope	http://revistadeliteratura.revistas.csic.es/index.php/revistadeliteratura/about/submissions#authorGuidelines		http://revistadeliteratura.revistas.csic.es/index.php/revistadeliteratura/about/submissions#copyrightNotice	48	http://revistadeliteratura.revistas.csic.es/index.php/revistadeliteratura/about/editorialPolicies#openAccessPolicy	Yes	http://revistadeliteratura.revistas.csic.es/index.php/revistadeliteratura/article/view/342	CC BY-NC		http://revistadeliteratura.revistas.csic.es/index.php/revistadeliteratura/about/submissions#copyrightNotice	Yes		False
Revista de Metalurgia	http://revistademetalurgia.revistas.csic.es		0034-8570	1988-4222	Consejo Superior de Investigaciones Científicas		OJS	Spain	No	http://revistademetalurgia.revistas.csic.es/index.php/revistademetalurgia/about/editorialPolicies				http://revistademetalurgia.revistas.csic.es/index.php/revistademetalurgia/about/editorialPolicies												DOI			1995	PDF, HTML, XML	mechanical engineering, machine design, welding, cutting, industrial processes, materials testing	English, Spanish; Castilian	http://revistademetalurgia.revistas.csic.es/index.php/revistademetalurgia/about/editorialTeam	Double blind peer review	http://revistademetalurgia.revistas.csic.es/index.php/revistademetalurgia/about/editorialPolicies#peerReviewProcess	http://revistademetalurgia.revistas.csic.es/index.php/revistademetalurgia/about/editorialPolicies#focusAndScope	http://revistademetalurgia.revistas.csic.es/index.php/revistademetalurgia/about/submissions#authorGuidelines			30	http://revistademetalurgia.revistas.csic.es/index.php/revistademetalurgia/about/editorialPolicies#openAccessPolicy	Yes	http://revistademetalurgia.revistas.csic.es/index.php/revistademetalurgia/article/view/1332/1399	CC BY-NC		http://revistademetalurgia.revistas.csic.es/index.php/revistademetalurgia/index	Yes		False
Revista de Pedagogie	http://revped.ise.ro/about-jp/	Journal of Pedagogy	0034-8678	2559-639X	Institutul de Stiinte ale Educatiei (Institute of Educational Sciences)		WordPress	Romania	No	http://revped.ise.ro/editorial-policy/				http://revped.ise.ro/editorial-policy/											Yes	DOI			2017	PDF	education sciences, educational policy, educational theory, curriculum, assessment in education	English, Romanian; Moldavian; Moldovan	http://revped.ise.ro/editorial-team/	Double blind peer review	http://revped.ise.ro/editorial-policy/	http://revped.ise.ro/about-jp/	http://revped.ise.ro/the-writer-guide-2/	Yes	http://revped.ise.ro/editorial-policy/	20	http://revped.ise.ro/editorial-policy/	Yes	http://revped.ise.ro/category/2017-en/	CC BY-NC-SA		http://revped.ise.ro/about-jp/	Yes		True
Revista de Saúde Pública	http://www.scielo.br/scielo.php?script=sci_serial&pid=0034-8910&lng=en&nrm=iso		0034-8910	1518-8787	Universidade de São Paulo		SciELO Brazil	Brazil	Yes	http://www.scielo.br/revistas/rsp/iinstruc.htm	1800	BRL - Brazilian Real		http://www.scielo.br/revistas/rsp/iinstruc.htm										http://www.scielo.br/revistas/rsp/iinstruc.htm	Yes				1967	PDF, HTML, XML	biological sciences, health sciences	English, Portuguese, Spanish; Castilian	http://www.scielo.br/revistas/rsp/iedboard.htm	Peer review	http://www.scielo.br/revistas/rsp/iinstruc.htm	http://www.scielo.br/revistas/rsp/iaboutj.htm	http://www.scielo.br/revistas/rsp/iinstruc.htm	Yes	http://www.scielo.br/revistas/rsp/iinstruc.htm	13	http://www.scielo.br/revistas/rsp/isubscrp.htm	Yes	http://www.scielo.br/scielo.php?script=sci_arttext&pid=S0034-89102015000100204&lng=en&nrm=iso&tlng=en	CC BY		http://www.scielo.br/revistas/rsp/isubscrp.htm	Yes		False
Interamerican Journal of Psychology	https://journal.sipsych.org/index.php/IJP/index	Revista Interamericana de Psicología	0034-9690		University of Florida		Redalyc	United States	No	https://journal.sipsych.org/index.php/IJP/about/editorialPolicies#openAccessPolicy				https://journal.sipsych.org/index.php/IJP/about/editorialPolicies#openAccessPolicy							CLOCKSS			http://journals.fcla.edu/ijp/issue/archive	Yes		Yes	http://journals.fcla.edu/ijp/manager/statistics	2011	PDF	psychology	English, French, Portuguese, Spanish; Castilian	http://journals.fcla.edu/ijp/index; http://journals.fcla.edu/ijp/pages/view/reviewers	Blind peer review	https://journal.sipsych.org/index.php/IJP/about/editorialPolicies#peerReviewProcess	https://journal.sipsych.org/index.php/IJP/about/editorialPolicies#focusAndScope	https://journal.sipsych.org/index.php/IJP/about/submissions#authorGuidelines			24	https://journal.sipsych.org/index.php/IJP/about/editorialPolicies#openAccessPolicy			CC BY		https://journal.sipsych.org/index.php/IJP/about/submissions#copyrightNotice	Yes		False
Revista Internacional de Sociología	http://revintsociologia.revistas.csic.es		0034-9712	1988-429X	Consejo Superior de Investigaciones Científicas		OJS	Spain	No	http://revintsociologia.revistas.csic.es/index.php/revintsociologia/about/editorialPolicies				http://revintsociologia.revistas.csic.es/index.php/revintsociologia/about/editorialPolicies												DOI			2003	PDF	social politics, economics, social anthropology, political sciences, social philosophy	English, Spanish; Castilian	http://revintsociologia.revistas.csic.es/index.php/revintsociologia/about/editorialTeam	Blind peer review	http://revintsociologia.revistas.csic.es/index.php/revintsociologia/about/editorialPolicies#peerReviewProcess	http://revintsociologia.revistas.csic.es/index.php/revintsociologia/about/editorialPolicies#focusAndScope	http://revintsociologia.revistas.csic.es/index.php/revintsociologia/about/submissions#authorGuidelines			53	http://revintsociologia.revistas.csic.es/index.php/revintsociologia/about/editorialPolicies#openAccessPolicy			CC BY-NC		http://revintsociologia.revistas.csic.es/index.php/revintsociologia/index	Yes		False
Revue de Géographie Alpine	http://rga.revues.org/	Journal of Alpine Research	0035-1121	1760-7426	Institut de Géographie Alpine		revues.org	France	No	http://rga.revues.org/?page=informations				http://rga.revues.org/?page=informations											Yes				2007	PDF, HTML	geography	English, French	http://rga.revues.org/755	Double blind peer review	http://rga.revues.org/?page=informations	http://rga.revues.org/759#tocto1n1	http://rga.revues.org/757			40	http://rga.revues.org/?page=informations	Yes	http://rga.revues.org/2561	CC BY-NC-ND		http://rga.revues.org/?page=informations	Yes		False
Rivista di Estetica	http://estetica.revues.org/		0035-6212	2421-5864	Rosenberg & Sellier		revues.org	Italy	No	http://estetica.revues.org/?page=informations				http://estetica.revues.org/?page=informations											Yes	DOI, Handles	Yes	https://logs.openedition.org/awstats.pl?config=estetica	2014	HTML	Arts & Humanities, Philosophy	English, French, Italian	http://estetica.revues.org/356	Double blind peer review	http://estetica.revues.org/?page=informations	http://estetica.revues.org/361	http://estetica.revues.org/359			30	http://estetica.revues.org/?page=informations	Yes	http://estetica.revues.org/372	CC BY-NC-ND		http://estetica.revues.org/?page=informations	Yes		False
Rivista Italiana di Ornitologia - Research in Ornithology	http://sisn.pagepress.org/index.php/rio/index	RIO	0035-6875	2385-0833	PAGEPress Publications	Società Italiana di Scienze Naturali and Museo Civico di Storia Naturale di Milano, Italy	OJS	Italy	No	http://sisn.pagepress.org/index.php/rio/pages/view/payments				http://sisn.pagepress.org/index.php/rio/pages/view/payments					Yes	http://www.pagepress.org/publications/authors_fee.html	Portico			http://www.pagepress.org/publishing-services/digital-preservation.html	Yes	DOI	Yes	http://sisn.pagepress.org/index.php/rio/pages/view/stats	2010	PDF, XML	ornithology, taxonomy, natural sciences	English, Italian	http://sisn.pagepress.org/index.php/rio/pages/view/board	Blind peer review	http://sisn.pagepress.org/index.php/rio/about/editorialPolicies#peerReviewProcess	http://sisn.pagepress.org/index.php/rio/about/editorialPolicies#focusAndScope	http://sisn.pagepress.org/index.php/rio/about/submissions#authorGuidelines	Yes	http://sisn.pagepress.org/index.php/rio/pages/view/plagiarism	12	http://www.pagepress.org/open-access.html		http://www.pagepress.org/open-access.html	CC BY-NC		http://www.pagepress.org/open-access.html	Yes	Sherpa/Romeo	True
Rivista Italiana di Paleontologia e Stratigrafia	http://riviste.unimi.it/index.php/RIPS/index		0035-6883	2039-4942	Università degli Studi di Milano		OJS	Italy	No	http://riviste.unimi.it/index.php/RIPS/about/editorialPolicies#focusAndScope				http://riviste.unimi.it/index.php/RIPS/about/editorialPolicies#focusAndScope								Biblioteca Nazionale Centrale di Firenze		http://nbn.depositolegale.it/urn%3Anbn%3Ait%3Aunimi-15255	Yes	DOI			2016	PDF	paleontology, stratigraphy, geology	English	http://riviste.unimi.it/index.php/RIPS/index	Peer review	http://riviste.unimi.it/index.php/RIPS/about/editorialPolicies#peerReviewProcess	http://riviste.unimi.it/index.php/RIPS/about/editorialPolicies#focusAndScope	http://riviste.unimi.it/index.php/RIPS/about/submissions#authorGuidelines			16	http://riviste.unimi.it/index.php/RIPS/about/editorialPolicies#openAccessPolicy	Yes	http://riviste.unimi.it/index.php/RIPS/rt/metadata/6518/0	CC BY-NC-ND		http://riviste.unimi.it/index.php/RIPS/about/editorialPolicies#openAccessPolicy	Yes	Sherpa/Romeo	True
Roczniki Panstwowego Zakladu Higieny	http://wydawnictwa.pzh.gov.pl/roczniki_pzh/en	Annals of the National Institute of Hygiene	0035-7715	2451-2311	National Institute of Public Health - National Institute of Hygiene	National Institute of Public Health - National Institute of Hygiene		Poland	Yes	http://wydawnictwa.pzh.gov.pl/roczniki_pzh/for-authors	150	EUR - Euro		http://wydawnictwa.pzh.gov.pl/roczniki_pzh/for-authors													Yes		1995	PDF	nutrition, public health, food safety, general medicine, health sciences, environmental hygiene	English	http://wydawnictwa.pzh.gov.pl/roczniki_pzh/editorial-staff	Double blind peer review	http://wydawnictwa.pzh.gov.pl/roczniki_pzh/for-reviewers	http://wydawnictwa.pzh.gov.pl/roczniki_pzh/en	http://wydawnictwa.pzh.gov.pl/roczniki_pzh/for-authors			16	http://wydawnictwa.pzh.gov.pl/roczniki_pzh/en	Yes	http://wydawnictwa.pzh.gov.pl/roczniki_pzh/download-article?id=1216	CC BY-NC		http://wydawnictwa.pzh.gov.pl/roczniki_pzh/en	Yes		False
The Journal of the Rutgers University Library	http://jrul.libraries.rutgers.edu/index.php/jrul/index		0036-0473	2331-3781	Rutgers University Libraries		Rutgers University	United States	No	http://jrul.libraries.rutgers.edu/index.php/jrul/about/submissions#onlineSubmissions				http://jrul.libraries.rutgers.edu/index.php/jrul/about/submissions#onlineSubmissions										https://rucore.libraries.rutgers.edu	Yes	DOI			2005	PDF	New Jersey history, History of libraries, History of books	English	http://jrul.libraries.rutgers.edu/index.php/jrul/about/editorialTeam	Editorial review	http://jrul.libraries.rutgers.edu/index.php/jrul/about/editorialPolicies#custom-0	http://jrul.libraries.rutgers.edu/index.php/jrul/about/editorialPolicies#focusAndScope	http://jrul.libraries.rutgers.edu/index.php/jrul/about/submissions#authorGuidelines			20	http://jrul.libraries.rutgers.edu/index.php/jrul/about/editorialPolicies#openAccessPolicy	Yes	http://jrul.libraries.rutgers.edu/index.php/jrul/about/submissions#copyrightNotice	CC BY-NC		http://jrul.libraries.rutgers.edu/index.php/jrul/about/submissions#privacyStatement	Yes	Sherpa/Romeo	True
Salud Pública de México	http://saludpublica.mx		0036-3634		Instituto Nacional de Salud Pública	Instituto Nacional de Salud Pública	OJS	Mexico	No	http://saludpublica.mx/index.php/spm/about/editorialPolicies#custom-0				http://saludpublica.mx/index.php/spm/about/editorialPolicies#custom-0							CLOCKSS			http://saludpublica.mx/index.php/spm/about/editorialPolicies#custom-1	Yes	DOI			1997	PDF, HTML	health sciences, epidemiology, nutrition, public health, health systems, environmental health	English, Spanish; Castilian	http://saludpublica.mx/index.php/spm/about/editorialTeam	Double blind peer review	http://saludpublica.mx/index.php/spm/about/editorialPolicies#peerReviewProcess	http://saludpublica.mx/index.php/spm/about/editorialPolicies#focusAndScope	http://saludpublica.mx/index.php/spm/about/submissions#authorGuidelines			34	http://saludpublica.mx/index.php/spm/about/editorialPolicies#custom-2			CC BY-NC-SA		http://saludpublica.mx/index.php/spm/about/editorialPolicies#custom-2	Yes		False
Revista do Instituto de Medicina Tropical de São Paulo	http://www.scielo.br/rimtsp		0036-4665	1678-9946	Universidade de São Paulo	Instituto de Medicina Tropical	SciELO Brazil	Brazil	Yes	http://www.scielo.br/revistas/rimtsp/iinstruc.htm	400	USD - US Dollar		http://www.scielo.br/revistas/rimtsp/iinstruc.htm										http://www.scielo.br/revistas/rimtsp/iinstruc.htm	Yes		Yes	http://www.scielo.br/scielo.php?script=sci_arttext&pid=S0036-46652015000200111&lng=en&nrm=iso&tlng=en	1987	PDF, HTML, XML	biological sciences, health sciences	English, Portuguese	http://www.scielo.br/revistas/rimtsp/iedboard.htm	Peer review	http://www.scielo.br/revistas/rimtsp/iinstruc.htm#Scope	http://www.scielo.br/revistas/rimtsp/iinstruc.htm	http://www.scielo.br/revistas/rimtsp/iinstruc.htm			8	http://www.scielo.br/revistas/rimtsp/isubscrp.htm	Yes	http://www.scielo.br/scielo.php?script=sci_arttext&pid=S0036-46652015000200111&lng=en&nrm=iso&tlng=en	CC BY-NC		http://www.scielo.br/revistas/rimtsp/iaboutj.htm	Yes		False
Scientia Pharmaceutica	http://www.mdpi.com/journal/scipharm		0036-8709	2218-0532	Österreichische Apotheker-Verlagsgesellschaft m. b. H.		MDPI AG	Austria	Yes	http://www.mdpi.com/journal/scipharm/apc	600	CHF - Swiss Franc		http://www.mdpi.com/journal/scipharm/apc								Swiss National Library		https://thekeepers.org/journals?query=0036-8709	Yes	DOI	Yes	http://www.mdpi.com/2218-0532/85/1/8	2006	PDF, XML	pharmacy, chemistry, pharmacology, medicine, pharmaceutical technology	English	http://www.mdpi.com/journal/scipharm/editors	Blind peer review	http://www.mdpi.com/journal/scipharm/instructions#editorial_procedure	http://www.mdpi.com/journal/scipharm/about	http://www.mdpi.com/journal/scipharm/instructions	Yes	http://www.mdpi.com/journal/scipharm/about	10	http://www.mdpi.com/journal/scipharm	Yes	http://www.mdpi.com/2218-0532/85/1/8	CC BY		http://www.mdpi.com/about/openaccess	Yes	Sherpa/Romeo	True
Sefarad : Revista de Estudios Hebraicos y Sefardíes	http://sefarad.revistas.csic.es		0037-0894	1988-320X	Consejo Superior de Investigaciones Científicas		OJS	Spain	No	http://sefarad.revistas.csic.es/index.php/sefarad/about/editorialPolicies#openAccessPolicy				http://sefarad.revistas.csic.es/index.php/sefarad/about/editorialPolicies												DOI			2001	PDF	jews in Spain, Sephardim, Judaism, cultural studies, philology, Hebrew	English, Portuguese, Spanish; Castilian	http://sefarad.revistas.csic.es/index.php/sefarad/about/editorialTeam	Double blind peer review	http://sefarad.revistas.csic.es/index.php/sefarad/about/editorialPolicies#peerReviewProcess	http://sefarad.revistas.csic.es/index.php/sefarad/about/editorialPolicies#focusAndScope	http://sefarad.revistas.csic.es/index.php/sefarad/about/submissions#authorGuidelines			48	http://sefarad.revistas.csic.es/index.php/sefarad/about/editorialPolicies#openAccessPolicy			CC BY-NC		http://sefarad.revistas.csic.es/index.php/sefarad/index	Yes		False
Služba Božja	http://hrcak.srce.hr/sluzba-bozja?lang=en		0037-7074	1849-1057	Catholic faculty of theology Split		Hrcak	Croatia	No	http://hrcak.srce.hr/sluzba-bozja?lang=en				http://hrcak.srce.hr/sluzba-bozja?lang=en													Yes	http://hrcak.srce.hr/index.php?show=clanak&id_clanak_jezik=228964	2000	PDF	liturgy, pastoral theology, ecumenical theology, canon law, moral theology, catechetics	Croatian, English, German, Italian	http://hrcak.srce.hr/sluzba-bozja?lang=en	Double blind peer review	http://hrcak.srce.hr/sluzba-bozja?lang=en	http://hrcak.srce.hr/sluzba-bozja?lang=en	http://hrcak.srce.hr/sluzba-bozja?lang=en			24	http://hrcak.srce.hr/sluzba-bozja?lang=en			CC BY		http://hrcak.srce.hr/sluzba-bozja?lang=en	Yes		False
Social Work/Maatskaplike Werk	http://socialwork.journals.ac.za/pub/index		0037-8054	2312-7198	Stellenbosch University		OJS	South Africa	Yes	http://socialwork.journals.ac.za/pub/about/editorialPolicies#custom-3	3000	ZAR - Rand		http://socialwork.journals.ac.za/pub/about/editorialPolicies#custom-3							CLOCKSS, Portico			http://socialwork.journals.ac.za/pub/about/editorialPolicies#custom-4	Yes	DOI			2014	PDF	welfare organizations, social work, social welfare, family and child care, community work, welfare policy	Afrikaans, English	http://socialwork.journals.ac.za/pub/about/editorialTeam	Double blind peer review	http://socialwork.journals.ac.za/pub/about/editorialPolicies#peerReviewProcess	http://socialwork.journals.ac.za/pub/about/editorialPolicies#focusAndScope	http://socialwork.journals.ac.za/pub/about/submissions#authorGuidelines			6	http://socialwork.journals.ac.za/pub/about/editorialPolicies#openAccessPolicy			CC BY-SA		http://socialwork.journals.ac.za/pub/about/submissions#copyrightNotice	Yes		False
Revista da Sociedade Brasileira de Medicina Tropical	http://www.scielo.br/scielo.php/script_sci_serial/pid_0037-8682/lng_pt/nrm_iso	Jornal Brasileiro de Medicina Tropical	0037-8682	1678-9849	Sociedade Brasileira de Medicina Tropical (SBMT)		SciELO Brazil	Brazil	No	http://www.scielo.br/revistas/rsbmt/iinstruc.htm#002				http://www.scielo.br/revistas/rsbmt/iinstruc.htm#002										http://www.scielo.br/revistas/rsbmt/iinstruc.htm	Yes	DOI	Yes		1997	PDF, HTML, XML	health sciences	English, Portuguese, Spanish; Castilian	http://www.scielo.br/revistas/rsbmt/iedboard.htm	Peer review	http://www.scielo.br/revistas/rsbmt/iinstruc.htm	http://www.scielo.br/revistas/rsbmt/iinstruc.htm	http://www.scielo.br/revistas/rsbmt/iinstruc.htm			8	http://www.scielo.br/revistas/rsbmt/iinstruc.htm	Yes	http://www.scielo.br/scielo.php?script=sci_arttext&pid=S0037-86822015000300258&lng=en&nrm=iso&tlng=en	CC BY		http://www.scielo.br/scielo.php/script_sci_serial/pid_0037-8682/lng_pt/nrm_iso	Yes		False
Boletim da Sociedade Paranaense de Matemática	http://www.periodicos.uem.br/ojs/index.php/BSocParanMat/index		0037-8712	2175-1188	Sociedade Brasileira de Matemática		OJS	Brazil	No	http://www.periodicos.uem.br/ojs/index.php/BSocParanMat/about/submissions#onlineSubmissions				http://www.periodicos.uem.br/ojs/index.php/BSocParanMat/about/submissions#onlineSubmissions											Yes	DOI			2002	PDF	pure mathematics, applied mathematics	English, Portuguese	http://www.periodicos.uem.br/ojs/index.php/BSocParanMat/about/editorialTeam	Double blind peer review	http://www.periodicos.uem.br/ojs/index.php/BSocParanMat/about/editorialPolicies#peerReviewProcess	http://www.periodicos.uem.br/ojs/index.php/BSocParanMat/about/editorialPolicies#focusAndScope	http://www.periodicos.uem.br/ojs/index.php/BSocParanMat/about/submissions#authorGuidelines			25	http://www.periodicos.uem.br/ojs/index.php/BSocParanMat/about/editorialPolicies#openAccessPolicy			CC BY		http://www.periodicos.uem.br/ojs/index.php/BSocParanMat/about/editorialPolicies#sectionPolicies	Yes	Diadorim	False
South African Journal of Obstetrics and Gynaecology	http://www.sajog.org.za	SAJOG	0038-2329	2305-8862	Health and Medical Publishing Group		OJS	South Africa	No	http://www.sajog.org.za/index.php/SAJOG/about/editorialPolicies#custom-3				http://www.sajog.org.za/index.php/SAJOG/about/editorialPolicies#custom-3											Yes	DOI	Yes	http://www.sajog.org.za/index.php/SAJOG/article/view/906	2006	PDF	Gynaecology, Maternal Health, obstetrics	English	http://www.sajog.org.za/index.php/SAJOG/about/editorialTeam	Blind peer review	http://www.sajog.org.za/index.php/SAJOG/about/editorialPolicies#peerReviewProcess	http://www.sajog.org.za/index.php/SAJOG/about/editorialPolicies#focusAndScope	http://www.sajog.org.za/index.php/SAJOG/about/submissions#authorGuidelines	Yes	http://www.sajog.org.za/index.php/SAJOG/about/editorialPolicies#custom-2	15	http://sajog.org.za/index.php/SAJOG/about/editorialPolicies#openAccessPolicy	Yes	http://www.sajog.org.za/index.php/SAJOG/article/view/1050/496	CC BY-NC		http://sajog.org.za/index.php/SAJOG/about/editorialPolicies#custom-4	Yes		False
South African Journal of Science	http://www.sajs.co.za		0038-2353	1996-7489	Academy of Science of South Africa		OJS	South Africa	No	http://sajs.co.za/guidelines-authors#fees				http://sajs.co.za/guidelines-authors#fees							Portico			http://www.sajs.co.za/digital-archiving-and-preservation-policy	Yes	DOI	Yes	http://sajs.co.za/osteogenic-tumour-australopithecus-sediba-earliest-hominin-evidence-neoplastic-disease/patrick-s-randolph-quinney-scott-williams-maryna-steyn-marc-r-meyer-jacqueline-s-smilg-steven-e	2009	PDF, ePUB, XML	life sciences, social sciences, physical sciences, technology	English	http://www.sajs.co.za/about/editorial-team	Double blind peer review	http://www.sajs.co.za/peer-review-process	http://www.sajs.co.za/about/focus-and-scope	http://www.sajs.co.za/guidelines-authors	Yes	http://www.sajs.co.za/plagiarism-policy	52	http://www.sajs.co.za/open-access-and-copyright	Yes	http://www.sajs.co.za/qualification-coal-degradation-aid-micro-focus-computed-tomography/jacob-viljoen-quentin-p-campbell-marco-le-roux-jakobus-hoffman	CC BY		http://www.sajs.co.za/open-access-and-copyright	Yes	Sherpa/Romeo	True
Stanovništvo	http://www.doiserbia.nb.rs/journal.aspx?issn=0038-982X		0038-982X	2217-3986	Institute of Social Science, Belgrade		doiSerbia	Serbia	No	http://doiserbia.nb.rs/journal.aspx?issn=0038-982X&pg=editorialpolicy#Open access policy				http://doiserbia.nb.rs/journal.aspx?issn=0038-982X&pg=editorialpolicy#Open access policy									National Library of Serbia	http://www.doiserbia.nb.rs/journal.aspx?issn=0038-982X	Yes	DOI			2002	PDF	demographic research	English, Serbian	http://www.doiserbia.nb.rs/journal.aspx?issn=0038-982X	Peer review	http://doiserbia.nb.rs/journal.aspx?issn=0038-982X&pg=editorialpolicy#Peer review	http://doiserbia.nb.rs/journal.aspx?issn=0038-982X&pg=editorialpolicy#Editorial policy	http://doiserbia.nb.rs/journal.aspx?issn=0038-982X&pg=instructionsforauthors			15	http://doiserbia.nb.rs/journal.aspx?issn=0038-982X&pg=editorialpolicy#Open access policy			CC BY-NC-ND		http://doiserbia.nb.rs/journal.aspx?issn=0038-982X&pg=editorialpolicy#Open access policy	Yes		False
Stomatološki glasnik Srbije	https://scindeks.ceon.rs/journaldetails.aspx?issn=0039-1743		0039-1743	1452-3701	Serbian Medical Society - Dental Section, Belgrade		SCIndeks: Serbian Citation Index	Serbia	No	https://scindeks.ceon.rs/PublicationPolicy.aspx?issn=0039-1743&amp;lang=en#ppAC				https://scindeks.ceon.rs/PublicationPolicy.aspx?issn=0039-1743&amp;lang=en#ppAC								National Library of Serbia		https://scindeks.ceon.rs/journaldetails.aspx?issn=0039-1743	Yes	DOI	Yes	https://scindeks.ceon.rs/article.aspx?query=ISSID%26and%2613523&page=1&sort=8&stype=0&backurl=%2fissue.aspx%3fissue%3d13523	2013	PDF	dentistry, endodontics, prosthodontics, orthodontics, oral surgery	English, Serbian	https://scindeks.ceon.rs/EditorialBoard.aspx?issn=0039-1743&amp;lang=en	Double blind peer review	https://scindeks.ceon.rs/PublicationPolicy.aspx?issn=0039-1743&amp;lang=en#ppRT	https://scindeks.ceon.rs/Portrait.aspx?issn=0039-1743	https://scindeks-clanci.ceon.rs/data/uputstva/0039-1743ue.pdf			12	https://scindeks.ceon.rs/PublicationPolicy.aspx?issn=0039-1743&amp;lang=en#ppOA			CC BY-SA		https://scindeks.ceon.rs/PublicationPolicy.aspx?issn=0039-1743&amp;lang=en#ppLC	Yes		True
Studia Psychologica	http://www.studiapsychologica.com/		0039-3320	2585-8815	Slovak Academy of Sciences, Centre of Social and Psychological Sciences	Institute of Experimental Psychology		Slovakia	No	http://www.studiapsychologica.com/				http://www.studiapsychologica.com/											Yes				2016	PDF	cognition, emotions, personality, social psychology	English	http://www.studiapsychologica.com/	Double blind peer review	http://www.studiapsychologica.com/	http://www.studiapsychologica.com/	http://www.studiapsychologica.com/			43	http://www.studiapsychologica.com/			CC BY		http://www.studiapsychologica.com/	Yes		True
Studii si Cercetari de Istoria Artei : Teatru, Muzica, Cinematografie	http://www.scia.istoria-artei.ro/		0039-3991	2067-5119	Publishing House of the Romanian Academy	G. Oprescu Institute of Art History		Romania	No	http://www.scia.istoria-artei.ro/submissions.php				http://www.scia.istoria-artei.ro/submissions.php											Yes				2007	PDF	theatre history, music history, film history	English, French, German, Romanian; Moldavian; Moldovan	http://www.scia.istoria-artei.ro/editorial-team.php	Blind peer review	http://www.scia.istoria-artei.ro/submissions.php	http://www.scia.istoria-artei.ro/about-the-journal.php	http://www.scia.istoria-artei.ro/guidelines-for-authors.php			40	http://www.scia.istoria-artei.ro/			Publisher's own license	Attribution, No Commercial Usage, No Derivatives	http://www.scia.istoria-artei.ro/copyright-and-permissions-info.php	Yes		False
Taal en Tongval: Language Variation in the Low Countries	http://www.taalentongval.eu/		0039-8691	2215-1214	Amsterdam University Press		IngentaConnect	Netherlands	Yes	http://en.aup.nl/en/journals/taal-en-tongval-language-variation-in-the-low-countries.html	200	EUR - Euro		http://en.aup.nl/en/journals/taal-en-tongval-language-variation-in-the-low-countries.html					Yes	http://en.aup.nl/en/journals/taal-en-tongval-language-variation-in-the-low-countries.html					Yes	DOI			2009	PDF, HTML	linguistics, language variation, Dutch, Flemish, low countries	Dutch; Flemish, English, German	http://en.aup.nl/en/journals/taal-en-tongval-language-variation-in-the-low-countries.html	Double blind peer review	http://en.aup.nl/en/journals/taal-en-tongval-language-variation-in-the-low-countries.html	http://en.aup.nl/en/journals/taal-en-tongval-language-variation-in-the-low-countries.html	http://en.aup.nl/wosmedia/1262/instructions_for_authors_journal_articles.pdf			53	http://www.taalentongval.eu/			CC BY-NC-ND		http://www.taalentongval.eu/	Yes		False
Tehnika	http://scindeks.ceon.rs/journalDetails.aspx?issn=0040-2176&lang=en		0040-2176	2560-3086	Savez inženjera i tehnicara Srbije	string	SCIndeks: Serbian Citation Index	Serbia	No	http://scindeks.ceon.rs/PublicationPolicy.aspx?issn=0040-2176&lang=en#ppAC				http://scindeks.ceon.rs/PublicationPolicy.aspx?issn=0040-2176&lang=en#ppAC								National Library of Serbia		http://scindeks.ceon.rs/PublicationPolicy.aspx?issn=0040-2176	Yes	DOI			2014	PDF	geology, mining, electrical engineering, mechanical engineering, civil engineering, new materials	English, Serbian	http://scindeks.ceon.rs/EditorialBoard.aspx?issn=0040-2176&lang=en	Blind peer review	http://scindeks.ceon.rs/PublicationPolicy.aspx?issn=0040-2176&lang=en#ppRT	http://scindeks.ceon.rs/Portrait.aspx?issn=0040-2176	http://scindeks-clanci.ceon.rs/data/uputstva/0040-2176us.pdf		http://scindeks.ceon.rs/PublicationPolicy.aspx?issn=0040-2176&lang=en#ppSP	4	http://scindeks.ceon.rs/PublicationPolicy.aspx?issn=0040-2176&lang=en#ppOA	Yes	http://scindeks.ceon.rs/article.aspx?artid=0040-21761601016M	CC BY		http://scindeks.ceon.rs/PublicationPolicy.aspx?issn=0040-2176&lang=en#ppLC	Yes		True
Tidsskrift for Samfunnsforskning	http://www.idunn.no/tfs	Norwegian Journal of Social Research	0040-716X	1504-291X	Scandinavian University Press/Universitetsforlaget	Institutt for Samfunnsforskning	Idunn	Norway	No	https://www.idunn.no/tfs#about				https://www.idunn.no/tfs#about											Yes	DOI			2017	PDF, HTML, XML	political science, sociology, social anthropology, economy, history, media	Bokmål, Norwegian; Norwegian Bokmål	https://www.idunn.no/tfs#editors	Double blind peer review	https://www.idunn.no/tfs#about	https://www.idunn.no/tfs#about	https://www.idunn.no/tfs#authors			52	https://www.idunn.no/tfs#rights	Yes	https://www.idunn.no/tfs/2017/02/hoeyreklikk_en_analyse_av_ytre_hoeyre_paa_sosiale_medier_i_no	CC BY-NC		https://www.idunn.no/tfs#rights	Yes	Sherpa/Romeo	True
El Trimestre Económico	http://www.eltrimestreeconomico.com.mx/index.php/te/index		0041-3011	2448-718X	Fondo de Cultura Económica	Fondo de Cultura Económica	Redalyc	Mexico	No	http://www.eltrimestreeconomico.com.mx/index.php/te/index				http://www.eltrimestreeconomico.com.mx/index.php/te/index										http://www.eltrimestreeconomico.com.mx/index.php/te/about/editorialPolicies#custom-6		DOI			2011	PDF	latin america, development, economics	Spanish; Castilian	http://www.eltrimestreeconomico.com.mx/index.php/te/about/displayMembership/4	Peer review	http://www.eltrimestreeconomico.com.mx/index.php/te/about/editorialPolicies#peerReviewProcess	http://www.eltrimestreeconomico.com.mx/index.php/te/about/editorialPolicies#focusAndScope	http://www.eltrimestreeconomico.com.mx/index.php/te/about/submissions#onlineSubmissions	Yes	http://www.eltrimestreeconomico.com.mx/index.php/te/about/editorialPolicies#custom-6	40	http://www.eltrimestreeconomico.com.mx/index.php/te/about/editorialPolicies#openAccessPolicy			CC BY-NC-ND		http://www.eltrimestreeconomico.com.mx/index.php/te/about/submissions#copyrightNotice	Yes		False
Tydskrif vir Letterkunde	http://journals.assaf.org.za/index.php/tvl	Journal for Literature	0041-476X	2309-9070	Tydskrif vir Letterkunde Association	University of Pretoria	OJS	South Africa	Yes	http://journals.assaf.org.za/index.php/tvl/about/editorialPolicies#custom-5	6000	ZAR - Rand		http://journals.assaf.org.za/index.php/tvl/about/editorialPolicies#custom-5					Yes	http://journals.assaf.org.za/index.php/tvl/about/editorialPolicies#custom-5	LOCKSS, CLOCKSS, Portico			http://journals.assaf.org.za/index.php/tvl/about/editorialPolicies#custom-3	Yes	DOI	Yes	http://journals.assaf.org.za/index.php/tvl/about/editorialPolicies#custom-4	2015	PDF	African literature, cultural practices, Francophone literature	Afrikaans, Dutch; Flemish, English, French	http://journals.assaf.org.za/index.php/tvl/about/editorialTeam	Double blind peer review	http://journals.assaf.org.za/index.php/tvl/about/editorialPolicies#peerReviewProcess	http://journals.assaf.org.za/index.php/tvl/about/editorialPolicies#focusAndScope	http://journals.assaf.org.za/index.php/tvl/about/submissions#authorGuidelines	Yes	http://journals.assaf.org.za/index.php/tvl/about/editorialPolicies#custom-0	16	http://journals.assaf.org.za/index.php/tvl/about/editorialPolicies#openAccessPolicy	Yes	http://journals.assaf.org.za/tvl/article/view/1173/1028	CC BY-SA		http://journals.assaf.org.za/index.php/tvl/about/editorialPolicies#custom-2	Yes		False
Tecnología Química	http://revistas.uo.edu.cu/index.php/tq		0041-8420	2224-6185	Universidad de Oriente	Universidad de Oriente	OJS	Cuba	No	http://revistas.uo.edu.cu/index.php/tq/about/editorialPolicies#custom-0				http://revistas.uo.edu.cu/index.php/tq/about/editorialPolicies#custom-0							CLOCKSS			https://thekeepers.org/journals?query=0041-8420					2008	PDF	chemistry industry, chemistry of materials	Spanish; Castilian	http://revistas.uo.edu.cu/index.php/tq/about/editorialTeam	Double blind peer review	http://revistas.uo.edu.cu/index.php/tq/about/editorialPolicies#peerReviewProcess	http://revistas.uo.edu.cu/index.php/tq/about/editorialPolicies#focusAndScope	http://revistas.uo.edu.cu/index.php/tq/about/submissions#authorGuidelines			12	http://revistas.uo.edu.cu/index.php/tq/about/editorialPolicies#openAccessPolicy			CC BY-NC		http://revistas.uo.edu.cu/index.php/tq/about/editorialPolicies#openAccessPolicy	Yes		False
Revista do Hospital das Clínicas	http://www.scielo.br/rhc		0041-8781	1678-9903	Universidade de São Paulo - FM/USP		SciELO Brazil		No Information																				1999		health sciences
Revista de Ciências Sociais	http://www.rcs.ufc.br		0041-8862	2318-4620	Universidade Federal do Ceará	Universidade Federal do Ceará, Departamento de Ciências Sociais	OJS	Brazil	No	http://www.periodicos.ufc.br/revcienso/about/editorialPolicies#openAccessPolicy				http://www.periodicos.ufc.br/revcienso/about/editorialPolicies#openAccessPolicy											Yes				2005	PDF	social science, anthropology, sociology, political science	Portuguese	http://www.periodicos.ufc.br/revcienso/about/editorialTeam	Double blind peer review	http://www.periodicos.ufc.br/revcienso/about/editorialPolicies#peerReviewProcess	http://www.periodicos.ufc.br/revcienso/about/editorialPolicies#focusAndScope	http://www.periodicos.ufc.br/revcienso/about/submissions#authorGuidelines			50	http://www.periodicos.ufc.br/revcienso/about/editorialPolicies#openAccessPolicy			CC BY		http://www.periodicos.ufc.br/revcienso/about/submissions#copyrightNotice	Yes	Diadorim	True
Veritas	http://revistaseletronicas.pucrs.br/ojs/index.php/veritas	Verita: Revista trimestral de filosofia da PUCRS	0042-3955	1984-6746	Editora da Pontifícia Universidade Católica do Rio Grande do Sul (EDIPUCRS)	Pontifícia Universidade Católica do Rio Grande do Sul	OJS	Brazil	No	http://revistaseletronicas.pucrs.br/ojs/index.php/veritas/about/editorialPolicies#custom-7				http://revistaseletronicas.pucrs.br/ojs/index.php/veritas/about/editorialPolicies#custom-7								Biblioteca Nacional do Brasil		http://revistaseletronicas.pucrs.br/ojs/index.php/veritas/about/editorialPolicies#archiving	Yes	DOI			2005	PDF	religion	English, French, German, Italian, Latin, Portuguese, Spanish; Castilian	http://revistaseletronicas.pucrs.br/ojs/index.php/veritas/about/editorialPolicies#custom-1	Double blind peer review	http://revistaseletronicas.pucrs.br/ojs/index.php/veritas/about/editorialPolicies#peerReviewProcess	http://revistaseletronicas.pucrs.br/ojs/index.php/veritas/about/editorialPolicies#focusAndScope	http://revistaseletronicas.pucrs.br/ojs/index.php/veritas/about/submissions#authorGuidelines			10	http://revistaseletronicas.pucrs.br/ojs/index.php/veritas/about/editorialPolicies#openAccessPolicy	Yes	http://revistaseletronicas.pucrs.br/ojs/index.php/veritas/article/view/15317/11345	CC BY		http://revistaseletronicas.pucrs.br/ojs/index.php/veritas/index	Yes	Sherpa/Romeo, Diadorim	True
Vestnik Dermatologii i Venerologii	http://www.vestnikdv.ru		0042-4609	2313-6294	State Scientific Center of Dermatovenereology and Cosmetology	Russian Society of Dermatovenereology and Cosmetology	Elpub.ru	Russian Federation	No	http://www.vestnikdv.ru/jour/about/editorialPolicies#custom-4				http://www.vestnikdv.ru/jour/about/editorialPolicies#custom-4									elibrary.ru	https://elibrary.ru/title_about.asp?id=7685	Yes	DOI			2014	PDF	cosmetology, dermatology, sexually-transmitted infections	Russian	http://www.vestnikdv.ru/index.php/jour/pages/view/EditorialS	Peer review	http://www.vestnikdv.ru/jour/about/editorialPolicies#custom-0	http://www.vestnikdv.ru/jour/about/editorialPolicies#focusAndScope	http://www.vestnikdv.ru/jour/about/submissions	Yes	http://www.vestnikdv.ru/jour/about/editorialPolicies#custom-6	8	http://www.vestnikdv.ru/jour/about/editorialPolicies#openAccessPolicy			CC BY		http://www.vestnikdv.ru/jour/about/submissions#copyrightNotice	Yes		True
Journal of Hydrology and Hydromechanics	http://www.degruyter.com/view/j/johh	Vodohospodársky Casopis	0042-790X		Sciendo	The Institute of Hydrology of the Slovak Academy of Sciences, Bratislava, Slovakia and the Institute of Hydrodynamics of the Academy of Sciences of the Czech Republic, v. v. i., Prague, Czech Republic	Sciendo	Poland	No	http://www.degruyter.com/view/supplement/s0042790X_Instructions_for_Authors.pdf				http://www.degruyter.com/view/supplement/s0042790X_Instructions_for_Authors.pdf							Portico			http://www.degruyter.com/page/860	Yes	DOI			2009	PDF	Biohydrology, Catchment hydrology, Vadose zone hydrology, hydromechanics	English	http://www.degruyter.com/view/j/johh	Blind peer review	http://www.degruyter.com/view/j/johh	http://www.degruyter.com/view/j/johh	http://www.degruyter.com/view/j/johh	Yes	http://degruyteropen.com/versita-takes-a-further-step-to-ward-off-plagiarism/	8	http://degruyteropen.com/you/journal-author/open-access-statement/	Yes	http://www.degruyter.com/view/j/johh.2015.63.issue-1/johh-2015-0005/johh-2015-0005.xml?format=INT	CC BY-NC-ND		http://degruyteropen.com/you/journal-author/copyright-and-license-statement/	Yes	Sherpa/Romeo	False
[truncated: 12,173 more rows]
[truncated: 7 more columns]

## Sheet: Total
Journal article processing charges (APCs)	(Alle)
[truncated: 7 more rows]

[truncated: 18 more sheets: PlanS compliant, Ark13, Publisher size statistics, Publishers, Licenses, Archiving, Total per  APC antall OK langua, Total per publsize og antall OK, Review, Fields, Ark1, Per field, size, APC, Ark3, Total per APC og antall OK, Ark5, Policy, Technical, Massaged data]
